# Supplementary material for: Resistance Exercise Reverses Aging in Human Skeletal Muscle
Source: PLoS One. 2007 May 23;2(5):e465. doi: 10.1371/journal.pone.0000465 (PMC1866181; doi:10.1371/journal.pone.0000465)
Supplement: Table S1 — Age and Sex of individuals used in these studies. The subset of individuals who were subjected to exercise training is also shown “Post exercise”. (0.03 MB XLS) [file pone.0000465.s001.xls]

## Sheet: Age
Subject Code	Age	Gender
A1	65	F
A2	66	F
A3	80	F
A4	65	F
A5	69	F
A6	68	F
A7	66	F
A8	69	F
A9	68	F
A10	65	F
A11	70	F
A12	73	F
A13	74	M
A14	73	M
A15	67	M
A16	66	M
A17	71	M
A18	74	M
A19	79	M
A20	73	M
A21	76	M
A22	67	M
A23	84	M
A24	68	M
A25	67	M
A26	20	M
A27	22	M
A28	19	M
A29	19	F
A30	19	F
A31	23	F
A32	21	F
A33	18	F
A34	22	F
A35	21	F
A36	28	F
A37	21	F
A38	20	M
A39	22	F
A40	22	M
A41	21	M
A42	27	F
A43	21	M
A44	20	M
A45	21	M
A46	22	F
A47	18	F
A48	23	F
A49	20	M
A50	20	M
A51	22	M

## Sheet: Post Exercise
Subject Code	Age	Gender
A2	66	F
A4	65	F
A5	69	F
A6	68	F
A8	69	F
A10	65	F
A11	70	F
A12	73	F
A14	73	M
A17	71	M
A19	79	M
A20	73	M
A22	67	M
A25	67	M
