# Supplementary material for: Resistance Exercise Reverses Aging in Human Skeletal Muscle
Source: PLoS One. 2007 May 23;2(5):e465. doi: 10.1371/journal.pone.0000465 (PMC1866181; doi:10.1371/journal.pone.0000465)
Supplement: Table S3 — GO miner analysis of the genes listed in Supplemental Table 2. For a complete description of the column headers, see http://discover.nci.nih.gov/gominer/hi-thruput-defs.jsp. (0.51 MB XLS) [file pone.0000465.s003.xls]

## Sheet: Sheet1
HYPERLINKED GO CATEGORY	HYPERLINKED GENE NAME	TOTAL GENES	CHANGED GENES	ENRICHMENT	LOG10(p)	CUMULATIVE NUMBER OF CATEGORIES	CUMULATIVE RANDOMS MEAN	FALSE DISCOVERY RATE
GO:0045333_cellular_respiration	SUCLA2	32	14	12.7014	-12.1744	1	0	0
GO:0045333_cellular_respiration	SUCLG1	32	14	12.7014	-12.1744	1	0	0
GO:0045333_cellular_respiration	CS	32	14	12.7014	-12.1744	1	0	0
GO:0045333_cellular_respiration	UQCRH	32	14	12.7014	-12.1744	1	0	0
GO:0045333_cellular_respiration	CYCS	32	14	12.7014	-12.1744	1	0	0
GO:0045333_cellular_respiration	PDHB	32	14	12.7014	-12.1744	1	0	0
GO:0045333_cellular_respiration	SDHB	32	14	12.7014	-12.1744	1	0	0
GO:0045333_cellular_respiration	IDH1	32	14	12.7014	-12.1744	1	0	0
GO:0045333_cellular_respiration	UQCRC2	32	14	12.7014	-12.1744	1	0	0
GO:0045333_cellular_respiration	IDH3A	32	14	12.7014	-12.1744	1	0	0
GO:0045333_cellular_respiration	SDHC	32	14	12.7014	-12.1744	1	0	0
GO:0045333_cellular_respiration	UQCRC1	32	14	12.7014	-12.1744	1	0	0
GO:0045333_cellular_respiration	OXA1L	32	14	12.7014	-12.1744	1	0	0
GO:0045333_cellular_respiration	UQCRB	32	14	12.7014	-12.1744	1	0	0
GO:0009060_aerobic_respiration	SUCLA2	30	13	12.5805	-11.2748	2	0	0
GO:0009060_aerobic_respiration	SUCLG1	30	13	12.5805	-11.2748	2	0	0
GO:0009060_aerobic_respiration	CS	30	13	12.5805	-11.2748	2	0	0
GO:0009060_aerobic_respiration	UQCRH	30	13	12.5805	-11.2748	2	0	0
GO:0009060_aerobic_respiration	PDHB	30	13	12.5805	-11.2748	2	0	0
GO:0009060_aerobic_respiration	SDHB	30	13	12.5805	-11.2748	2	0	0
GO:0009060_aerobic_respiration	IDH1	30	13	12.5805	-11.2748	2	0	0
GO:0009060_aerobic_respiration	UQCRC2	30	13	12.5805	-11.2748	2	0	0
GO:0009060_aerobic_respiration	IDH3A	30	13	12.5805	-11.2748	2	0	0
GO:0009060_aerobic_respiration	SDHC	30	13	12.5805	-11.2748	2	0	0
GO:0009060_aerobic_respiration	UQCRC1	30	13	12.5805	-11.2748	2	0	0
GO:0009060_aerobic_respiration	OXA1L	30	13	12.5805	-11.2748	2	0	0
GO:0009060_aerobic_respiration	UQCRB	30	13	12.5805	-11.2748	2	0	0
GO:0006084_acetyl-CoA_metabolism	SUCLA2	27	10	10.7525	-7.99056	7	0	0
GO:0006084_acetyl-CoA_metabolism	IDH1	27	10	10.7525	-7.99056	7	0	0
GO:0006084_acetyl-CoA_metabolism	IDH3A	27	10	10.7525	-7.99056	7	0	0
GO:0006084_acetyl-CoA_metabolism	DLAT	27	10	10.7525	-7.99056	7	0	0
GO:0006084_acetyl-CoA_metabolism	SUCLG1	27	10	10.7525	-7.99056	7	0	0
GO:0006084_acetyl-CoA_metabolism	SDHC	27	10	10.7525	-7.99056	7	0	0
GO:0006084_acetyl-CoA_metabolism	CS	27	10	10.7525	-7.99056	7	0	0
GO:0006084_acetyl-CoA_metabolism	PDHA1	27	10	10.7525	-7.99056	7	0	0
GO:0006084_acetyl-CoA_metabolism	PDHB	27	10	10.7525	-7.99056	7	0	0
GO:0006084_acetyl-CoA_metabolism	SDHB	27	10	10.7525	-7.99056	7	0	0
GO:0006099_tricarboxylic_acid_cycle	SUCLA2	22	8	10.557	-6.41985	12	0	0
GO:0006099_tricarboxylic_acid_cycle	IDH1	22	8	10.557	-6.41985	12	0	0
GO:0006099_tricarboxylic_acid_cycle	IDH3A	22	8	10.557	-6.41985	12	0	0
GO:0006099_tricarboxylic_acid_cycle	SUCLG1	22	8	10.557	-6.41985	12	0	0
GO:0006099_tricarboxylic_acid_cycle	SDHC	22	8	10.557	-6.41985	12	0	0
GO:0006099_tricarboxylic_acid_cycle	CS	22	8	10.557	-6.41985	12	0	0
GO:0006099_tricarboxylic_acid_cycle	PDHB	22	8	10.557	-6.41985	12	0	0
GO:0006099_tricarboxylic_acid_cycle	SDHB	22	8	10.557	-6.41985	12	0	0
GO:0046356_acetyl-CoA_catabolism	SUCLA2	22	8	10.557	-6.41985	12	0	0
GO:0046356_acetyl-CoA_catabolism	IDH1	22	8	10.557	-6.41985	12	0	0
GO:0046356_acetyl-CoA_catabolism	IDH3A	22	8	10.557	-6.41985	12	0	0
GO:0046356_acetyl-CoA_catabolism	SUCLG1	22	8	10.557	-6.41985	12	0	0
GO:0046356_acetyl-CoA_catabolism	SDHC	22	8	10.557	-6.41985	12	0	0
GO:0046356_acetyl-CoA_catabolism	CS	22	8	10.557	-6.41985	12	0	0
GO:0046356_acetyl-CoA_catabolism	PDHB	22	8	10.557	-6.41985	12	0	0
GO:0046356_acetyl-CoA_catabolism	SDHB	22	8	10.557	-6.41985	12	0	0
GO:0009109_coenzyme_catabolism	SUCLA2	23	8	10.098	-6.24732	13	0.01	0.000769
GO:0009109_coenzyme_catabolism	IDH1	23	8	10.098	-6.24732	13	0.01	0.000769
GO:0009109_coenzyme_catabolism	IDH3A	23	8	10.098	-6.24732	13	0.01	0.000769
GO:0009109_coenzyme_catabolism	SUCLG1	23	8	10.098	-6.24732	13	0.01	0.000769
GO:0009109_coenzyme_catabolism	SDHC	23	8	10.098	-6.24732	13	0.01	0.000769
GO:0009109_coenzyme_catabolism	CS	23	8	10.098	-6.24732	13	0.01	0.000769
GO:0009109_coenzyme_catabolism	PDHB	23	8	10.098	-6.24732	13	0.01	0.000769
GO:0009109_coenzyme_catabolism	SDHB	23	8	10.098	-6.24732	13	0.01	0.000769
GO:0051187_cofactor_catabolism	SUCLA2	27	8	8.60203	-5.64383	14	0.02	0.001429
GO:0051187_cofactor_catabolism	IDH1	27	8	8.60203	-5.64383	14	0.02	0.001429
GO:0051187_cofactor_catabolism	IDH3A	27	8	8.60203	-5.64383	14	0.02	0.001429
GO:0051187_cofactor_catabolism	SUCLG1	27	8	8.60203	-5.64383	14	0.02	0.001429
GO:0051187_cofactor_catabolism	SDHC	27	8	8.60203	-5.64383	14	0.02	0.001429
GO:0051187_cofactor_catabolism	CS	27	8	8.60203	-5.64383	14	0.02	0.001429
GO:0051187_cofactor_catabolism	PDHB	27	8	8.60203	-5.64383	14	0.02	0.001429
GO:0051187_cofactor_catabolism	SDHB	27	8	8.60203	-5.64383	14	0.02	0.001429
GO:0042775_ATP_synthesis_coupled_electron_transport_(sensu_Eukaryota)	NDUFB3	23	6	7.57353	-4.00946	19	0.11	0.005789
GO:0042775_ATP_synthesis_coupled_electron_transport_(sensu_Eukaryota)	NDUFS2	23	6	7.57353	-4.00946	19	0.11	0.005789
GO:0042775_ATP_synthesis_coupled_electron_transport_(sensu_Eukaryota)	NDUFB8	23	6	7.57353	-4.00946	19	0.11	0.005789
GO:0042775_ATP_synthesis_coupled_electron_transport_(sensu_Eukaryota)	NDUFS3	23	6	7.57353	-4.00946	19	0.11	0.005789
GO:0042775_ATP_synthesis_coupled_electron_transport_(sensu_Eukaryota)	UQCRH	23	6	7.57353	-4.00946	19	0.11	0.005789
GO:0042775_ATP_synthesis_coupled_electron_transport_(sensu_Eukaryota)	UQCRB	23	6	7.57353	-4.00946	19	0.11	0.005789
GO:0042773_ATP_synthesis_coupled_electron_transport	NDUFB3	24	6	7.25796	-3.89717	20	0.11	0.0055
GO:0042773_ATP_synthesis_coupled_electron_transport	NDUFS2	24	6	7.25796	-3.89717	20	0.11	0.0055
GO:0042773_ATP_synthesis_coupled_electron_transport	NDUFB8	24	6	7.25796	-3.89717	20	0.11	0.0055
GO:0042773_ATP_synthesis_coupled_electron_transport	NDUFS3	24	6	7.25796	-3.89717	20	0.11	0.0055
GO:0042773_ATP_synthesis_coupled_electron_transport	UQCRH	24	6	7.25796	-3.89717	20	0.11	0.0055
GO:0042773_ATP_synthesis_coupled_electron_transport	UQCRB	24	6	7.25796	-3.89717	20	0.11	0.0055
GO:0006119_oxidative_phosphorylation	ATP5I	57	13	6.6213	-7.32914	8	0	0
GO:0006119_oxidative_phosphorylation	NDUFS2	57	13	6.6213	-7.32914	8	0	0
GO:0006119_oxidative_phosphorylation	ATP5H	57	13	6.6213	-7.32914	8	0	0
GO:0006119_oxidative_phosphorylation	NDUFB8	57	13	6.6213	-7.32914	8	0	0
GO:0006119_oxidative_phosphorylation	ATP5J	57	13	6.6213	-7.32914	8	0	0
GO:0006119_oxidative_phosphorylation	UQCRH	57	13	6.6213	-7.32914	8	0	0
GO:0006119_oxidative_phosphorylation	NDUFB3	57	13	6.6213	-7.32914	8	0	0
GO:0006119_oxidative_phosphorylation	ATP5G3	57	13	6.6213	-7.32914	8	0	0
GO:0006119_oxidative_phosphorylation	UQCRC2	57	13	6.6213	-7.32914	8	0	0
GO:0006119_oxidative_phosphorylation	NDUFS3	57	13	6.6213	-7.32914	8	0	0
GO:0006119_oxidative_phosphorylation	UQCRC1	57	13	6.6213	-7.32914	8	0	0
GO:0006119_oxidative_phosphorylation	ATP5C1	57	13	6.6213	-7.32914	8	0	0
GO:0006119_oxidative_phosphorylation	UQCRB	57	13	6.6213	-7.32914	8	0	0
GO:0006092_main_pathways_of_carbohydrate_metabolism	SUCLA2	76	14	5.34797	-6.60649	9	0	0
GO:0006092_main_pathways_of_carbohydrate_metabolism	PKM2	76	14	5.34797	-6.60649	9	0	0
GO:0006092_main_pathways_of_carbohydrate_metabolism	DLAT	76	14	5.34797	-6.60649	9	0	0
GO:0006092_main_pathways_of_carbohydrate_metabolism	SUCLG1	76	14	5.34797	-6.60649	9	0	0
GO:0006092_main_pathways_of_carbohydrate_metabolism	CS	76	14	5.34797	-6.60649	9	0	0
GO:0006092_main_pathways_of_carbohydrate_metabolism	TPI1	76	14	5.34797	-6.60649	9	0	0
GO:0006092_main_pathways_of_carbohydrate_metabolism	PDHA1	76	14	5.34797	-6.60649	9	0	0
GO:0006092_main_pathways_of_carbohydrate_metabolism	PDHB	76	14	5.34797	-6.60649	9	0	0
GO:0006092_main_pathways_of_carbohydrate_metabolism	SDHB	76	14	5.34797	-6.60649	9	0	0
GO:0006092_main_pathways_of_carbohydrate_metabolism	IDH1	76	14	5.34797	-6.60649	9	0	0
GO:0006092_main_pathways_of_carbohydrate_metabolism	IDH3A	76	14	5.34797	-6.60649	9	0	0
GO:0006092_main_pathways_of_carbohydrate_metabolism	HIBADH	76	14	5.34797	-6.60649	9	0	0
GO:0006092_main_pathways_of_carbohydrate_metabolism	SDHC	76	14	5.34797	-6.60649	9	0	0
GO:0006092_main_pathways_of_carbohydrate_metabolism	ACN9	76	14	5.34797	-6.60649	9	0	0
GO:0006732_coenzyme_metabolism	ATP5I	115	21	5.30147	-9.563	5	0	0
GO:0006732_coenzyme_metabolism	SUCLA2	115	21	5.30147	-9.563	5	0	0
GO:0006732_coenzyme_metabolism	COQ3	115	21	5.30147	-9.563	5	0	0
GO:0006732_coenzyme_metabolism	ATP5H	115	21	5.30147	-9.563	5	0	0
GO:0006732_coenzyme_metabolism	DLAT	115	21	5.30147	-9.563	5	0	0
GO:0006732_coenzyme_metabolism	SUCLG1	115	21	5.30147	-9.563	5	0	0
GO:0006732_coenzyme_metabolism	CS	115	21	5.30147	-9.563	5	0	0
GO:0006732_coenzyme_metabolism	ATP5J	115	21	5.30147	-9.563	5	0	0
GO:0006732_coenzyme_metabolism	PDHA1	115	21	5.30147	-9.563	5	0	0
GO:0006732_coenzyme_metabolism	TPI1	115	21	5.30147	-9.563	5	0	0
GO:0006732_coenzyme_metabolism	PDHB	115	21	5.30147	-9.563	5	0	0
GO:0006732_coenzyme_metabolism	GGTL3	115	21	5.30147	-9.563	5	0	0
GO:0006732_coenzyme_metabolism	SDHB	115	21	5.30147	-9.563	5	0	0
GO:0006732_coenzyme_metabolism	ATP5G3	115	21	5.30147	-9.563	5	0	0
GO:0006732_coenzyme_metabolism	MOCS2	115	21	5.30147	-9.563	5	0	0
GO:0006732_coenzyme_metabolism	IDH1	115	21	5.30147	-9.563	5	0	0
GO:0006732_coenzyme_metabolism	GLRX2	115	21	5.30147	-9.563	5	0	0
GO:0006732_coenzyme_metabolism	IDH3A	115	21	5.30147	-9.563	5	0	0
GO:0006732_coenzyme_metabolism	SDHC	115	21	5.30147	-9.563	5	0	0
GO:0006732_coenzyme_metabolism	HIBADH	115	21	5.30147	-9.563	5	0	0
GO:0006732_coenzyme_metabolism	ATP5C1	115	21	5.30147	-9.563	5	0	0
GO:0051186_cofactor_metabolism	ATP5I	134	23	4.98308	-9.85725	4	0	0
GO:0051186_cofactor_metabolism	SUCLA2	134	23	4.98308	-9.85725	4	0	0
GO:0051186_cofactor_metabolism	COQ3	134	23	4.98308	-9.85725	4	0	0
GO:0051186_cofactor_metabolism	HMBS	134	23	4.98308	-9.85725	4	0	0
GO:0051186_cofactor_metabolism	ATP5H	134	23	4.98308	-9.85725	4	0	0
GO:0051186_cofactor_metabolism	DLAT	134	23	4.98308	-9.85725	4	0	0
GO:0051186_cofactor_metabolism	SUCLG1	134	23	4.98308	-9.85725	4	0	0
GO:0051186_cofactor_metabolism	CS	134	23	4.98308	-9.85725	4	0	0
GO:0051186_cofactor_metabolism	ATP5J	134	23	4.98308	-9.85725	4	0	0
GO:0051186_cofactor_metabolism	PDHA1	134	23	4.98308	-9.85725	4	0	0
GO:0051186_cofactor_metabolism	TPI1	134	23	4.98308	-9.85725	4	0	0
GO:0051186_cofactor_metabolism	PDHB	134	23	4.98308	-9.85725	4	0	0
GO:0051186_cofactor_metabolism	GGTL3	134	23	4.98308	-9.85725	4	0	0
GO:0051186_cofactor_metabolism	SDHB	134	23	4.98308	-9.85725	4	0	0
GO:0051186_cofactor_metabolism	ATP5G3	134	23	4.98308	-9.85725	4	0	0
GO:0051186_cofactor_metabolism	COX10	134	23	4.98308	-9.85725	4	0	0
GO:0051186_cofactor_metabolism	MOCS2	134	23	4.98308	-9.85725	4	0	0
GO:0051186_cofactor_metabolism	IDH1	134	23	4.98308	-9.85725	4	0	0
GO:0051186_cofactor_metabolism	GLRX2	134	23	4.98308	-9.85725	4	0	0
GO:0051186_cofactor_metabolism	IDH3A	134	23	4.98308	-9.85725	4	0	0
GO:0051186_cofactor_metabolism	SDHC	134	23	4.98308	-9.85725	4	0	0
GO:0051186_cofactor_metabolism	HIBADH	134	23	4.98308	-9.85725	4	0	0
GO:0051186_cofactor_metabolism	ATP5C1	134	23	4.98308	-9.85725	4	0	0
GO:0015980_energy_derivation_by_oxidation_of_organic_compounds	SUCLA2	122	20	4.75932	-8.27815	6	0	0
GO:0015980_energy_derivation_by_oxidation_of_organic_compounds	PKM2	122	20	4.75932	-8.27815	6	0	0
GO:0015980_energy_derivation_by_oxidation_of_organic_compounds	DLAT	122	20	4.75932	-8.27815	6	0	0
GO:0015980_energy_derivation_by_oxidation_of_organic_compounds	SUCLG1	122	20	4.75932	-8.27815	6	0	0
GO:0015980_energy_derivation_by_oxidation_of_organic_compounds	CS	122	20	4.75932	-8.27815	6	0	0
GO:0015980_energy_derivation_by_oxidation_of_organic_compounds	TPI1	122	20	4.75932	-8.27815	6	0	0
GO:0015980_energy_derivation_by_oxidation_of_organic_compounds	PDHA1	122	20	4.75932	-8.27815	6	0	0
GO:0015980_energy_derivation_by_oxidation_of_organic_compounds	UQCRH	122	20	4.75932	-8.27815	6	0	0
GO:0015980_energy_derivation_by_oxidation_of_organic_compounds	CYCS	122	20	4.75932	-8.27815	6	0	0
GO:0015980_energy_derivation_by_oxidation_of_organic_compounds	PDHB	122	20	4.75932	-8.27815	6	0	0
GO:0015980_energy_derivation_by_oxidation_of_organic_compounds	SDHB	122	20	4.75932	-8.27815	6	0	0
GO:0015980_energy_derivation_by_oxidation_of_organic_compounds	IDH1	122	20	4.75932	-8.27815	6	0	0
GO:0015980_energy_derivation_by_oxidation_of_organic_compounds	UQCRC2	122	20	4.75932	-8.27815	6	0	0
GO:0015980_energy_derivation_by_oxidation_of_organic_compounds	IDH3A	122	20	4.75932	-8.27815	6	0	0
GO:0015980_energy_derivation_by_oxidation_of_organic_compounds	HIBADH	122	20	4.75932	-8.27815	6	0	0
GO:0015980_energy_derivation_by_oxidation_of_organic_compounds	SDHC	122	20	4.75932	-8.27815	6	0	0
GO:0015980_energy_derivation_by_oxidation_of_organic_compounds	UQCRC1	122	20	4.75932	-8.27815	6	0	0
GO:0015980_energy_derivation_by_oxidation_of_organic_compounds	OXA1L	122	20	4.75932	-8.27815	6	0	0
GO:0015980_energy_derivation_by_oxidation_of_organic_compounds	ACN9	122	20	4.75932	-8.27815	6	0	0
GO:0015980_energy_derivation_by_oxidation_of_organic_compounds	UQCRB	122	20	4.75932	-8.27815	6	0	0
GO:0009145_purine_nucleoside_triphosphate_biosynthesis	ATP5G3	48	7	4.23381	-2.92975	26	0.88	0.033846
GO:0009145_purine_nucleoside_triphosphate_biosynthesis	NME2	48	7	4.23381	-2.92975	26	0.88	0.033846
GO:0009145_purine_nucleoside_triphosphate_biosynthesis	ATP5I	48	7	4.23381	-2.92975	26	0.88	0.033846
GO:0009145_purine_nucleoside_triphosphate_biosynthesis	ATP5H	48	7	4.23381	-2.92975	26	0.88	0.033846
GO:0009145_purine_nucleoside_triphosphate_biosynthesis	NME3	48	7	4.23381	-2.92975	26	0.88	0.033846
GO:0009145_purine_nucleoside_triphosphate_biosynthesis	ATP5J	48	7	4.23381	-2.92975	26	0.88	0.033846
GO:0009145_purine_nucleoside_triphosphate_biosynthesis	ATP5C1	48	7	4.23381	-2.92975	26	0.88	0.033846
GO:0009201_ribonucleoside_triphosphate_biosynthesis	ATP5G3	48	7	4.23381	-2.92975	26	0.88	0.033846
GO:0009201_ribonucleoside_triphosphate_biosynthesis	NME2	48	7	4.23381	-2.92975	26	0.88	0.033846
GO:0009201_ribonucleoside_triphosphate_biosynthesis	ATP5I	48	7	4.23381	-2.92975	26	0.88	0.033846
GO:0009201_ribonucleoside_triphosphate_biosynthesis	ATP5H	48	7	4.23381	-2.92975	26	0.88	0.033846
GO:0009201_ribonucleoside_triphosphate_biosynthesis	NME3	48	7	4.23381	-2.92975	26	0.88	0.033846
GO:0009201_ribonucleoside_triphosphate_biosynthesis	ATP5J	48	7	4.23381	-2.92975	26	0.88	0.033846
GO:0009201_ribonucleoside_triphosphate_biosynthesis	ATP5C1	48	7	4.23381	-2.92975	26	0.88	0.033846
GO:0009206_purine_ribonucleoside_triphosphate_biosynthesis	ATP5G3	48	7	4.23381	-2.92975	26	0.88	0.033846
GO:0009206_purine_ribonucleoside_triphosphate_biosynthesis	NME2	48	7	4.23381	-2.92975	26	0.88	0.033846
GO:0009206_purine_ribonucleoside_triphosphate_biosynthesis	ATP5I	48	7	4.23381	-2.92975	26	0.88	0.033846
GO:0009206_purine_ribonucleoside_triphosphate_biosynthesis	ATP5H	48	7	4.23381	-2.92975	26	0.88	0.033846
GO:0009206_purine_ribonucleoside_triphosphate_biosynthesis	NME3	48	7	4.23381	-2.92975	26	0.88	0.033846
GO:0009206_purine_ribonucleoside_triphosphate_biosynthesis	ATP5J	48	7	4.23381	-2.92975	26	0.88	0.033846
GO:0009206_purine_ribonucleoside_triphosphate_biosynthesis	ATP5C1	48	7	4.23381	-2.92975	26	0.88	0.033846
GO:0051188_cofactor_biosynthesis	ATP5G3	80	11	3.99188	-4.06943	18	0.11	0.006111
GO:0051188_cofactor_biosynthesis	ATP5I	80	11	3.99188	-4.06943	18	0.11	0.006111
GO:0051188_cofactor_biosynthesis	COQ3	80	11	3.99188	-4.06943	18	0.11	0.006111
GO:0051188_cofactor_biosynthesis	COX10	80	11	3.99188	-4.06943	18	0.11	0.006111
GO:0051188_cofactor_biosynthesis	SUCLA2	80	11	3.99188	-4.06943	18	0.11	0.006111
GO:0051188_cofactor_biosynthesis	MOCS2	80	11	3.99188	-4.06943	18	0.11	0.006111
GO:0051188_cofactor_biosynthesis	HMBS	80	11	3.99188	-4.06943	18	0.11	0.006111
GO:0051188_cofactor_biosynthesis	ATP5H	80	11	3.99188	-4.06943	18	0.11	0.006111
GO:0051188_cofactor_biosynthesis	ATP5J	80	11	3.99188	-4.06943	18	0.11	0.006111
GO:0051188_cofactor_biosynthesis	ATP5C1	80	11	3.99188	-4.06943	18	0.11	0.006111
GO:0051188_cofactor_biosynthesis	GGTL3	80	11	3.99188	-4.06943	18	0.11	0.006111
GO:0006118_electron_transport	NDUFS2	243	26	3.10629	-6.60103	10	0	0
GO:0006118_electron_transport	ETFDH	243	26	3.10629	-6.60103	10	0	0
GO:0006118_electron_transport	MTO1	243	26	3.10629	-6.60103	10	0	0
GO:0006118_electron_transport	NDUFB8	243	26	3.10629	-6.60103	10	0	0
GO:0006118_electron_transport	UQCRFS1	243	26	3.10629	-6.60103	10	0	0
GO:0006118_electron_transport	UQCRH	243	26	3.10629	-6.60103	10	0	0
GO:0006118_electron_transport	SDHB	243	26	3.10629	-6.60103	10	0	0
GO:0006118_electron_transport	NDUFB3	243	26	3.10629	-6.60103	10	0	0
GO:0006118_electron_transport	UQCRC2	243	26	3.10629	-6.60103	10	0	0
GO:0006118_electron_transport	GLRX2	243	26	3.10629	-6.60103	10	0	0
GO:0006118_electron_transport	COX7A3	243	26	3.10629	-6.60103	10	0	0
GO:0006118_electron_transport	HCCS	243	26	3.10629	-6.60103	10	0	0
GO:0006118_electron_transport	TARS	243	26	3.10629	-6.60103	10	0	0
GO:0006118_electron_transport	OXA1L	243	26	3.10629	-6.60103	10	0	0
GO:0006118_electron_transport	UQCRB	243	26	3.10629	-6.60103	10	0	0
GO:0006118_electron_transport	DLD	243	26	3.10629	-6.60103	10	0	0
GO:0006118_electron_transport	FRDA	243	26	3.10629	-6.60103	10	0	0
GO:0006118_electron_transport	CYP1B1	243	26	3.10629	-6.60103	10	0	0
GO:0006118_electron_transport	CYCS	243	26	3.10629	-6.60103	10	0	0
GO:0006118_electron_transport	PTGES2	243	26	3.10629	-6.60103	10	0	0
GO:0006118_electron_transport	NNT	243	26	3.10629	-6.60103	10	0	0
GO:0006118_electron_transport	FDXR	243	26	3.10629	-6.60103	10	0	0
GO:0006118_electron_transport	PDCD8	243	26	3.10629	-6.60103	10	0	0
GO:0006118_electron_transport	SDHC	243	26	3.10629	-6.60103	10	0	0
GO:0006118_electron_transport	NDUFS3	243	26	3.10629	-6.60103	10	0	0
GO:0006118_electron_transport	UQCRC1	243	26	3.10629	-6.60103	10	0	0
GO:0006091_generation_of_precursor_metabolites_and_energy	NDUFS2	426	44	2.99859	-10.4105	3	0	0
GO:0006091_generation_of_precursor_metabolites_and_energy	ETFDH	426	44	2.99859	-10.4105	3	0	0
GO:0006091_generation_of_precursor_metabolites_and_energy	MTO1	426	44	2.99859	-10.4105	3	0	0
GO:0006091_generation_of_precursor_metabolites_and_energy	DLAT	426	44	2.99859	-10.4105	3	0	0
GO:0006091_generation_of_precursor_metabolites_and_energy	NDUFB8	426	44	2.99859	-10.4105	3	0	0
GO:0006091_generation_of_precursor_metabolites_and_energy	UQCRFS1	426	44	2.99859	-10.4105	3	0	0
GO:0006091_generation_of_precursor_metabolites_and_energy	PDHA1	426	44	2.99859	-10.4105	3	0	0
GO:0006091_generation_of_precursor_metabolites_and_energy	ATP5J	426	44	2.99859	-10.4105	3	0	0
GO:0006091_generation_of_precursor_metabolites_and_energy	UQCRH	426	44	2.99859	-10.4105	3	0	0
GO:0006091_generation_of_precursor_metabolites_and_energy	PDHB	426	44	2.99859	-10.4105	3	0	0
GO:0006091_generation_of_precursor_metabolites_and_energy	SDHB	426	44	2.99859	-10.4105	3	0	0
GO:0006091_generation_of_precursor_metabolites_and_energy	NDUFB3	426	44	2.99859	-10.4105	3	0	0
GO:0006091_generation_of_precursor_metabolites_and_energy	UQCRC2	426	44	2.99859	-10.4105	3	0	0
GO:0006091_generation_of_precursor_metabolites_and_energy	IDH3A	426	44	2.99859	-10.4105	3	0	0
GO:0006091_generation_of_precursor_metabolites_and_energy	GLRX2	426	44	2.99859	-10.4105	3	0	0
GO:0006091_generation_of_precursor_metabolites_and_energy	COX7A3	426	44	2.99859	-10.4105	3	0	0
GO:0006091_generation_of_precursor_metabolites_and_energy	HCCS	426	44	2.99859	-10.4105	3	0	0
GO:0006091_generation_of_precursor_metabolites_and_energy	TARS	426	44	2.99859	-10.4105	3	0	0
GO:0006091_generation_of_precursor_metabolites_and_energy	ACN9	426	44	2.99859	-10.4105	3	0	0
GO:0006091_generation_of_precursor_metabolites_and_energy	OXA1L	426	44	2.99859	-10.4105	3	0	0
GO:0006091_generation_of_precursor_metabolites_and_energy	ATP5C1	426	44	2.99859	-10.4105	3	0	0
GO:0006091_generation_of_precursor_metabolites_and_energy	UQCRB	426	44	2.99859	-10.4105	3	0	0
GO:0006091_generation_of_precursor_metabolites_and_energy	DLD	426	44	2.99859	-10.4105	3	0	0
GO:0006091_generation_of_precursor_metabolites_and_energy	ATP5I	426	44	2.99859	-10.4105	3	0	0
GO:0006091_generation_of_precursor_metabolites_and_energy	SUCLA2	426	44	2.99859	-10.4105	3	0	0
GO:0006091_generation_of_precursor_metabolites_and_energy	FRDA	426	44	2.99859	-10.4105	3	0	0
GO:0006091_generation_of_precursor_metabolites_and_energy	PKM2	426	44	2.99859	-10.4105	3	0	0
GO:0006091_generation_of_precursor_metabolites_and_energy	ATP5H	426	44	2.99859	-10.4105	3	0	0
GO:0006091_generation_of_precursor_metabolites_and_energy	CYP1B1	426	44	2.99859	-10.4105	3	0	0
GO:0006091_generation_of_precursor_metabolites_and_energy	SUCLG1	426	44	2.99859	-10.4105	3	0	0
GO:0006091_generation_of_precursor_metabolites_and_energy	CS	426	44	2.99859	-10.4105	3	0	0
GO:0006091_generation_of_precursor_metabolites_and_energy	TPI1	426	44	2.99859	-10.4105	3	0	0
GO:0006091_generation_of_precursor_metabolites_and_energy	CYCS	426	44	2.99859	-10.4105	3	0	0
GO:0006091_generation_of_precursor_metabolites_and_energy	PTGES2	426	44	2.99859	-10.4105	3	0	0
GO:0006091_generation_of_precursor_metabolites_and_energy	NNT	426	44	2.99859	-10.4105	3	0	0
GO:0006091_generation_of_precursor_metabolites_and_energy	ATP5G3	426	44	2.99859	-10.4105	3	0	0
GO:0006091_generation_of_precursor_metabolites_and_energy	FDXR	426	44	2.99859	-10.4105	3	0	0
GO:0006091_generation_of_precursor_metabolites_and_energy	IDH1	426	44	2.99859	-10.4105	3	0	0
GO:0006091_generation_of_precursor_metabolites_and_energy	CKMT2	426	44	2.99859	-10.4105	3	0	0
GO:0006091_generation_of_precursor_metabolites_and_energy	PDCD8	426	44	2.99859	-10.4105	3	0	0
GO:0006091_generation_of_precursor_metabolites_and_energy	HIBADH	426	44	2.99859	-10.4105	3	0	0
GO:0006091_generation_of_precursor_metabolites_and_energy	SDHC	426	44	2.99859	-10.4105	3	0	0
GO:0006091_generation_of_precursor_metabolites_and_energy	NDUFS3	426	44	2.99859	-10.4105	3	0	0
GO:0006091_generation_of_precursor_metabolites_and_energy	UQCRC1	426	44	2.99859	-10.4105	3	0	0
GO:0006631_fatty_acid_metabolism	FAAH	123	12	2.83237	-2.97499	21	0.84	0.04
GO:0006631_fatty_acid_metabolism	PLA2G4B	123	12	2.83237	-2.97499	21	0.84	0.04
GO:0006631_fatty_acid_metabolism	LYPLA1	123	12	2.83237	-2.97499	21	0.84	0.04
GO:0006631_fatty_acid_metabolism	PCCA	123	12	2.83237	-2.97499	21	0.84	0.04
GO:0006631_fatty_acid_metabolism	LTB4DH	123	12	2.83237	-2.97499	21	0.84	0.04
GO:0006631_fatty_acid_metabolism	PECI	123	12	2.83237	-2.97499	21	0.84	0.04
GO:0006631_fatty_acid_metabolism	PRKAG1	123	12	2.83237	-2.97499	21	0.84	0.04
GO:0006631_fatty_acid_metabolism	TPI1	123	12	2.83237	-2.97499	21	0.84	0.04
GO:0006631_fatty_acid_metabolism	HPGD	123	12	2.83237	-2.97499	21	0.84	0.04
GO:0006631_fatty_acid_metabolism	PTGES2	123	12	2.83237	-2.97499	21	0.84	0.04
GO:0006631_fatty_acid_metabolism	PECR	123	12	2.83237	-2.97499	21	0.84	0.04
GO:0006631_fatty_acid_metabolism	MGST2	123	12	2.83237	-2.97499	21	0.84	0.04
GO:0044249_cellular_biosynthesis	COPS5	798	44	1.60075	-2.94867	23	0.86	0.037391
GO:0044249_cellular_biosynthesis	PLCE1	798	44	1.60075	-2.94867	23	0.86	0.037391
GO:0044249_cellular_biosynthesis	CTH	798	44	1.60075	-2.94867	23	0.86	0.037391
GO:0044249_cellular_biosynthesis	FUT6	798	44	1.60075	-2.94867	23	0.86	0.037391
GO:0044249_cellular_biosynthesis	PABPC4	798	44	1.60075	-2.94867	23	0.86	0.037391
GO:0044249_cellular_biosynthesis	MTIF2	798	44	1.60075	-2.94867	23	0.86	0.037391
GO:0044249_cellular_biosynthesis	AARS	798	44	1.60075	-2.94867	23	0.86	0.037391
GO:0044249_cellular_biosynthesis	MRPS18B	798	44	1.60075	-2.94867	23	0.86	0.037391
GO:0044249_cellular_biosynthesis	ATP5J	798	44	1.60075	-2.94867	23	0.86	0.037391
GO:0044249_cellular_biosynthesis	MRPS16	798	44	1.60075	-2.94867	23	0.86	0.037391
GO:0044249_cellular_biosynthesis	MRPL15	798	44	1.60075	-2.94867	23	0.86	0.037391
GO:0044249_cellular_biosynthesis	EIF2C4	798	44	1.60075	-2.94867	23	0.86	0.037391
GO:0044249_cellular_biosynthesis	GGTL3	798	44	1.60075	-2.94867	23	0.86	0.037391
GO:0044249_cellular_biosynthesis	MGST2	798	44	1.60075	-2.94867	23	0.86	0.037391
GO:0044249_cellular_biosynthesis	NARS	798	44	1.60075	-2.94867	23	0.86	0.037391
GO:0044249_cellular_biosynthesis	NME2	798	44	1.60075	-2.94867	23	0.86	0.037391
GO:0044249_cellular_biosynthesis	MRPL34	798	44	1.60075	-2.94867	23	0.86	0.037391
GO:0044249_cellular_biosynthesis	MOCS2	798	44	1.60075	-2.94867	23	0.86	0.037391
GO:0044249_cellular_biosynthesis	SIAT8E	798	44	1.60075	-2.94867	23	0.86	0.037391
GO:0044249_cellular_biosynthesis	EIF4EBP1	798	44	1.60075	-2.94867	23	0.86	0.037391
GO:0044249_cellular_biosynthesis	MRPL35	798	44	1.60075	-2.94867	23	0.86	0.037391
GO:0044249_cellular_biosynthesis	NME3	798	44	1.60075	-2.94867	23	0.86	0.037391
GO:0044249_cellular_biosynthesis	HPGD	798	44	1.60075	-2.94867	23	0.86	0.037391
GO:0044249_cellular_biosynthesis	TARS	798	44	1.60075	-2.94867	23	0.86	0.037391
GO:0044249_cellular_biosynthesis	ACN9	798	44	1.60075	-2.94867	23	0.86	0.037391
GO:0044249_cellular_biosynthesis	ATP5C1	798	44	1.60075	-2.94867	23	0.86	0.037391
GO:0044249_cellular_biosynthesis	MRPL13	798	44	1.60075	-2.94867	23	0.86	0.037391
GO:0044249_cellular_biosynthesis	ATP5I	798	44	1.60075	-2.94867	23	0.86	0.037391
GO:0044249_cellular_biosynthesis	COQ3	798	44	1.60075	-2.94867	23	0.86	0.037391
GO:0044249_cellular_biosynthesis	SUCLA2	798	44	1.60075	-2.94867	23	0.86	0.037391
GO:0044249_cellular_biosynthesis	HMBS	798	44	1.60075	-2.94867	23	0.86	0.037391
GO:0044249_cellular_biosynthesis	ATP5H	798	44	1.60075	-2.94867	23	0.86	0.037391
GO:0044249_cellular_biosynthesis	MRPS33	798	44	1.60075	-2.94867	23	0.86	0.037391
GO:0044249_cellular_biosynthesis	POMT1	798	44	1.60075	-2.94867	23	0.86	0.037391
GO:0044249_cellular_biosynthesis	TPI1	798	44	1.60075	-2.94867	23	0.86	0.037391
GO:0044249_cellular_biosynthesis	PTGES2	798	44	1.60075	-2.94867	23	0.86	0.037391
GO:0044249_cellular_biosynthesis	MAN2A1	798	44	1.60075	-2.94867	23	0.86	0.037391
GO:0044249_cellular_biosynthesis	PECR	798	44	1.60075	-2.94867	23	0.86	0.037391
GO:0044249_cellular_biosynthesis	ATP5G3	798	44	1.60075	-2.94867	23	0.86	0.037391
GO:0044249_cellular_biosynthesis	COX10	798	44	1.60075	-2.94867	23	0.86	0.037391
GO:0044249_cellular_biosynthesis	MRPL49	798	44	1.60075	-2.94867	23	0.86	0.037391
GO:0044249_cellular_biosynthesis	MRPS5	798	44	1.60075	-2.94867	23	0.86	0.037391
GO:0044249_cellular_biosynthesis	ASMTL	798	44	1.60075	-2.94867	23	0.86	0.037391
GO:0044249_cellular_biosynthesis	PRKAG1	798	44	1.60075	-2.94867	23	0.86	0.037391
GO:0009058_biosynthesis	COPS5	892	48	1.56225	-2.95223	22	0.86	0.039091
GO:0009058_biosynthesis	CTH	892	48	1.56225	-2.95223	22	0.86	0.039091
GO:0009058_biosynthesis	PLCE1	892	48	1.56225	-2.95223	22	0.86	0.039091
GO:0009058_biosynthesis	FUT6	892	48	1.56225	-2.95223	22	0.86	0.039091
GO:0009058_biosynthesis	MTIF2	892	48	1.56225	-2.95223	22	0.86	0.039091
GO:0009058_biosynthesis	PABPC4	892	48	1.56225	-2.95223	22	0.86	0.039091
GO:0009058_biosynthesis	MRPS18B	892	48	1.56225	-2.95223	22	0.86	0.039091
GO:0009058_biosynthesis	AARS	892	48	1.56225	-2.95223	22	0.86	0.039091
GO:0009058_biosynthesis	ATP5J	892	48	1.56225	-2.95223	22	0.86	0.039091
GO:0009058_biosynthesis	MRPL15	892	48	1.56225	-2.95223	22	0.86	0.039091
GO:0009058_biosynthesis	MRPS16	892	48	1.56225	-2.95223	22	0.86	0.039091
GO:0009058_biosynthesis	EIF2C4	892	48	1.56225	-2.95223	22	0.86	0.039091
GO:0009058_biosynthesis	GOT2	892	48	1.56225	-2.95223	22	0.86	0.039091
GO:0009058_biosynthesis	GGTL3	892	48	1.56225	-2.95223	22	0.86	0.039091
GO:0009058_biosynthesis	MGST2	892	48	1.56225	-2.95223	22	0.86	0.039091
GO:0009058_biosynthesis	NME2	892	48	1.56225	-2.95223	22	0.86	0.039091
GO:0009058_biosynthesis	NARS	892	48	1.56225	-2.95223	22	0.86	0.039091
GO:0009058_biosynthesis	MRPL34	892	48	1.56225	-2.95223	22	0.86	0.039091
GO:0009058_biosynthesis	MOCS2	892	48	1.56225	-2.95223	22	0.86	0.039091
GO:0009058_biosynthesis	SIAT8E	892	48	1.56225	-2.95223	22	0.86	0.039091
GO:0009058_biosynthesis	EIF4EBP1	892	48	1.56225	-2.95223	22	0.86	0.039091
GO:0009058_biosynthesis	MRPL35	892	48	1.56225	-2.95223	22	0.86	0.039091
GO:0009058_biosynthesis	NME3	892	48	1.56225	-2.95223	22	0.86	0.039091
GO:0009058_biosynthesis	HPGD	892	48	1.56225	-2.95223	22	0.86	0.039091
GO:0009058_biosynthesis	TARS	892	48	1.56225	-2.95223	22	0.86	0.039091
GO:0009058_biosynthesis	ACN9	892	48	1.56225	-2.95223	22	0.86	0.039091
GO:0009058_biosynthesis	ATP5C1	892	48	1.56225	-2.95223	22	0.86	0.039091
GO:0009058_biosynthesis	MRPL13	892	48	1.56225	-2.95223	22	0.86	0.039091
GO:0009058_biosynthesis	ATP5I	892	48	1.56225	-2.95223	22	0.86	0.039091
GO:0009058_biosynthesis	COQ3	892	48	1.56225	-2.95223	22	0.86	0.039091
GO:0009058_biosynthesis	SUCLA2	892	48	1.56225	-2.95223	22	0.86	0.039091
GO:0009058_biosynthesis	HMBS	892	48	1.56225	-2.95223	22	0.86	0.039091
GO:0009058_biosynthesis	HSD17B7	892	48	1.56225	-2.95223	22	0.86	0.039091
GO:0009058_biosynthesis	ATP5H	892	48	1.56225	-2.95223	22	0.86	0.039091
GO:0009058_biosynthesis	SPHK2	892	48	1.56225	-2.95223	22	0.86	0.039091
GO:0009058_biosynthesis	MRPS33	892	48	1.56225	-2.95223	22	0.86	0.039091
GO:0009058_biosynthesis	POMT1	892	48	1.56225	-2.95223	22	0.86	0.039091
GO:0009058_biosynthesis	TPI1	892	48	1.56225	-2.95223	22	0.86	0.039091
GO:0009058_biosynthesis	PTGES2	892	48	1.56225	-2.95223	22	0.86	0.039091
GO:0009058_biosynthesis	MAN2A1	892	48	1.56225	-2.95223	22	0.86	0.039091
GO:0009058_biosynthesis	PECR	892	48	1.56225	-2.95223	22	0.86	0.039091
GO:0009058_biosynthesis	ATP5G3	892	48	1.56225	-2.95223	22	0.86	0.039091
GO:0009058_biosynthesis	FDXR	892	48	1.56225	-2.95223	22	0.86	0.039091
GO:0009058_biosynthesis	COX10	892	48	1.56225	-2.95223	22	0.86	0.039091
GO:0009058_biosynthesis	MRPL49	892	48	1.56225	-2.95223	22	0.86	0.039091
GO:0009058_biosynthesis	MRPS5	892	48	1.56225	-2.95223	22	0.86	0.039091
GO:0009058_biosynthesis	ASMTL	892	48	1.56225	-2.95223	22	0.86	0.039091
GO:0009058_biosynthesis	PRKAG1	892	48	1.56225	-2.95223	22	0.86	0.039091
GO:0044237_cellular_metabolism	CRY2	5028	211	1.21832	-5.19074	16	0.02	0.00125
GO:0044237_cellular_metabolism	DCOHM	5028	211	1.21832	-5.19074	16	0.02	0.00125
GO:0044237_cellular_metabolism	HDAC4	5028	211	1.21832	-5.19074	16	0.02	0.00125
GO:0044237_cellular_metabolism	ZNF274	5028	211	1.21832	-5.19074	16	0.02	0.00125
GO:0044237_cellular_metabolism	UQCRC2	5028	211	1.21832	-5.19074	16	0.02	0.00125
GO:0044237_cellular_metabolism	EIF4EBP1	5028	211	1.21832	-5.19074	16	0.02	0.00125
GO:0044237_cellular_metabolism	UXS1	5028	211	1.21832	-5.19074	16	0.02	0.00125
GO:0044237_cellular_metabolism	HCCS	5028	211	1.21832	-5.19074	16	0.02	0.00125
GO:0044237_cellular_metabolism	TARS	5028	211	1.21832	-5.19074	16	0.02	0.00125
GO:0044237_cellular_metabolism	ATP5C1	5028	211	1.21832	-5.19074	16	0.02	0.00125
GO:0044237_cellular_metabolism	DLD	5028	211	1.21832	-5.19074	16	0.02	0.00125
GO:0044237_cellular_metabolism	DDX17	5028	211	1.21832	-5.19074	16	0.02	0.00125
GO:0044237_cellular_metabolism	CRYAB	5028	211	1.21832	-5.19074	16	0.02	0.00125
GO:0044237_cellular_metabolism	HSD17B7	5028	211	1.21832	-5.19074	16	0.02	0.00125
GO:0044237_cellular_metabolism	JUND	5028	211	1.21832	-5.19074	16	0.02	0.00125
GO:0044237_cellular_metabolism	ZNF32	5028	211	1.21832	-5.19074	16	0.02	0.00125
GO:0044237_cellular_metabolism	MRPS33	5028	211	1.21832	-5.19074	16	0.02	0.00125
GO:0044237_cellular_metabolism	BRF2	5028	211	1.21832	-5.19074	16	0.02	0.00125
GO:0044237_cellular_metabolism	UBP1	5028	211	1.21832	-5.19074	16	0.02	0.00125
GO:0044237_cellular_metabolism	HDAC5	5028	211	1.21832	-5.19074	16	0.02	0.00125
GO:0044237_cellular_metabolism	NFX1	5028	211	1.21832	-5.19074	16	0.02	0.00125
GO:0044237_cellular_metabolism	ZNF430	5028	211	1.21832	-5.19074	16	0.02	0.00125
GO:0044237_cellular_metabolism	LTB4DH	5028	211	1.21832	-5.19074	16	0.02	0.00125
GO:0044237_cellular_metabolism	ATBF1	5028	211	1.21832	-5.19074	16	0.02	0.00125
GO:0044237_cellular_metabolism	RBM5	5028	211	1.21832	-5.19074	16	0.02	0.00125
GO:0044237_cellular_metabolism	SFRS4	5028	211	1.21832	-5.19074	16	0.02	0.00125
GO:0044237_cellular_metabolism	HPN	5028	211	1.21832	-5.19074	16	0.02	0.00125
GO:0044237_cellular_metabolism	SMT3H1	5028	211	1.21832	-5.19074	16	0.02	0.00125
GO:0044237_cellular_metabolism	PLCE1	5028	211	1.21832	-5.19074	16	0.02	0.00125
GO:0044237_cellular_metabolism	MTIF2	5028	211	1.21832	-5.19074	16	0.02	0.00125
GO:0044237_cellular_metabolism	MRPS18B	5028	211	1.21832	-5.19074	16	0.02	0.00125
GO:0044237_cellular_metabolism	EIF2C4	5028	211	1.21832	-5.19074	16	0.02	0.00125
GO:0044237_cellular_metabolism	RABGGTB	5028	211	1.21832	-5.19074	16	0.02	0.00125
GO:0044237_cellular_metabolism	GGTL3	5028	211	1.21832	-5.19074	16	0.02	0.00125
GO:0044237_cellular_metabolism	NDUFA9	5028	211	1.21832	-5.19074	16	0.02	0.00125
GO:0044237_cellular_metabolism	PECI	5028	211	1.21832	-5.19074	16	0.02	0.00125
GO:0044237_cellular_metabolism	LIPT1	5028	211	1.21832	-5.19074	16	0.02	0.00125
GO:0044237_cellular_metabolism	SUCLA2	5028	211	1.21832	-5.19074	16	0.02	0.00125
GO:0044237_cellular_metabolism	ATP5H	5028	211	1.21832	-5.19074	16	0.02	0.00125
GO:0044237_cellular_metabolism	CS	5028	211	1.21832	-5.19074	16	0.02	0.00125
GO:0044237_cellular_metabolism	POMT1	5028	211	1.21832	-5.19074	16	0.02	0.00125
GO:0044237_cellular_metabolism	TEP1	5028	211	1.21832	-5.19074	16	0.02	0.00125
GO:0044237_cellular_metabolism	NNT	5028	211	1.21832	-5.19074	16	0.02	0.00125
GO:0044237_cellular_metabolism	XBP1	5028	211	1.21832	-5.19074	16	0.02	0.00125
GO:0044237_cellular_metabolism	PPIF	5028	211	1.21832	-5.19074	16	0.02	0.00125
GO:0044237_cellular_metabolism	COPS5	5028	211	1.21832	-5.19074	16	0.02	0.00125
GO:0044237_cellular_metabolism	CTH	5028	211	1.21832	-5.19074	16	0.02	0.00125
GO:0044237_cellular_metabolism	DLAT	5028	211	1.21832	-5.19074	16	0.02	0.00125
GO:0044237_cellular_metabolism	SLBP	5028	211	1.21832	-5.19074	16	0.02	0.00125
GO:0044237_cellular_metabolism	AARS	5028	211	1.21832	-5.19074	16	0.02	0.00125
GO:0044237_cellular_metabolism	MRPS16	5028	211	1.21832	-5.19074	16	0.02	0.00125
GO:0044237_cellular_metabolism	RAD51L1	5028	211	1.21832	-5.19074	16	0.02	0.00125
GO:0044237_cellular_metabolism	PDHB	5028	211	1.21832	-5.19074	16	0.02	0.00125
GO:0044237_cellular_metabolism	VLDLR	5028	211	1.21832	-5.19074	16	0.02	0.00125
GO:0044237_cellular_metabolism	DATF1	5028	211	1.21832	-5.19074	16	0.02	0.00125
GO:0044237_cellular_metabolism	TTF2	5028	211	1.21832	-5.19074	16	0.02	0.00125
GO:0044237_cellular_metabolism	GLRX2	5028	211	1.21832	-5.19074	16	0.02	0.00125
GO:0044237_cellular_metabolism	COX7A3	5028	211	1.21832	-5.19074	16	0.02	0.00125
GO:0044237_cellular_metabolism	CCNL2	5028	211	1.21832	-5.19074	16	0.02	0.00125
GO:0044237_cellular_metabolism	UQCRB	5028	211	1.21832	-5.19074	16	0.02	0.00125
GO:0044237_cellular_metabolism	DMRT2	5028	211	1.21832	-5.19074	16	0.02	0.00125
GO:0044237_cellular_metabolism	CBLB	5028	211	1.21832	-5.19074	16	0.02	0.00125
GO:0044237_cellular_metabolism	DCLRE1C	5028	211	1.21832	-5.19074	16	0.02	0.00125
GO:0044237_cellular_metabolism	HMBS	5028	211	1.21832	-5.19074	16	0.02	0.00125
GO:0044237_cellular_metabolism	CYP1B1	5028	211	1.21832	-5.19074	16	0.02	0.00125
GO:0044237_cellular_metabolism	CYCS	5028	211	1.21832	-5.19074	16	0.02	0.00125
GO:0044237_cellular_metabolism	TAZ	5028	211	1.21832	-5.19074	16	0.02	0.00125
GO:0044237_cellular_metabolism	SIRT5	5028	211	1.21832	-5.19074	16	0.02	0.00125
GO:0044237_cellular_metabolism	SNAI2	5028	211	1.21832	-5.19074	16	0.02	0.00125
GO:0044237_cellular_metabolism	TP73L	5028	211	1.21832	-5.19074	16	0.02	0.00125
GO:0044237_cellular_metabolism	HIBADH	5028	211	1.21832	-5.19074	16	0.02	0.00125
GO:0044237_cellular_metabolism	ATM	5028	211	1.21832	-5.19074	16	0.02	0.00125
GO:0044237_cellular_metabolism	ADH1A	5028	211	1.21832	-5.19074	16	0.02	0.00125
GO:0044237_cellular_metabolism	MTO1	5028	211	1.21832	-5.19074	16	0.02	0.00125
GO:0044237_cellular_metabolism	FUT6	5028	211	1.21832	-5.19074	16	0.02	0.00125
GO:0044237_cellular_metabolism	ZNF454	5028	211	1.21832	-5.19074	16	0.02	0.00125
GO:0044237_cellular_metabolism	MRPL15	5028	211	1.21832	-5.19074	16	0.02	0.00125
GO:0044237_cellular_metabolism	H1FX	5028	211	1.21832	-5.19074	16	0.02	0.00125
GO:0044237_cellular_metabolism	UQCRH	5028	211	1.21832	-5.19074	16	0.02	0.00125
GO:0044237_cellular_metabolism	ZNF266	5028	211	1.21832	-5.19074	16	0.02	0.00125
GO:0044237_cellular_metabolism	HMGN2	5028	211	1.21832	-5.19074	16	0.02	0.00125
GO:0044237_cellular_metabolism	DNAJC7	5028	211	1.21832	-5.19074	16	0.02	0.00125
GO:0044237_cellular_metabolism	NDUFB3	5028	211	1.21832	-5.19074	16	0.02	0.00125
GO:0044237_cellular_metabolism	UCHL3	5028	211	1.21832	-5.19074	16	0.02	0.00125
GO:0044237_cellular_metabolism	KLF5	5028	211	1.21832	-5.19074	16	0.02	0.00125
GO:0044237_cellular_metabolism	MIZ1	5028	211	1.21832	-5.19074	16	0.02	0.00125
GO:0044237_cellular_metabolism	ZNF91	5028	211	1.21832	-5.19074	16	0.02	0.00125
GO:0044237_cellular_metabolism	OXA1L	5028	211	1.21832	-5.19074	16	0.02	0.00125
GO:0044237_cellular_metabolism	RING1	5028	211	1.21832	-5.19074	16	0.02	0.00125
GO:0044237_cellular_metabolism	MRPL13	5028	211	1.21832	-5.19074	16	0.02	0.00125
GO:0044237_cellular_metabolism	TAF9	5028	211	1.21832	-5.19074	16	0.02	0.00125
GO:0044237_cellular_metabolism	COQ3	5028	211	1.21832	-5.19074	16	0.02	0.00125
GO:0044237_cellular_metabolism	HNRPM	5028	211	1.21832	-5.19074	16	0.02	0.00125
GO:0044237_cellular_metabolism	SPHK2	5028	211	1.21832	-5.19074	16	0.02	0.00125
GO:0044237_cellular_metabolism	MKKS	5028	211	1.21832	-5.19074	16	0.02	0.00125
GO:0044237_cellular_metabolism	ADH1B	5028	211	1.21832	-5.19074	16	0.02	0.00125
GO:0044237_cellular_metabolism	PECR	5028	211	1.21832	-5.19074	16	0.02	0.00125
GO:0044237_cellular_metabolism	GADD45G	5028	211	1.21832	-5.19074	16	0.02	0.00125
GO:0044237_cellular_metabolism	MRPL49	5028	211	1.21832	-5.19074	16	0.02	0.00125
GO:0044237_cellular_metabolism	IDH1	5028	211	1.21832	-5.19074	16	0.02	0.00125
GO:0044237_cellular_metabolism	ASMTL	5028	211	1.21832	-5.19074	16	0.02	0.00125
GO:0044237_cellular_metabolism	CDC14B	5028	211	1.21832	-5.19074	16	0.02	0.00125
GO:0044237_cellular_metabolism	TAF5	5028	211	1.21832	-5.19074	16	0.02	0.00125
GO:0044237_cellular_metabolism	UQCRC1	5028	211	1.21832	-5.19074	16	0.02	0.00125
GO:0044237_cellular_metabolism	PLA2G4B	5028	211	1.21832	-5.19074	16	0.02	0.00125
GO:0044237_cellular_metabolism	NDUFS2	5028	211	1.21832	-5.19074	16	0.02	0.00125
GO:0044237_cellular_metabolism	DDX23	5028	211	1.21832	-5.19074	16	0.02	0.00125
GO:0044237_cellular_metabolism	ETFDH	5028	211	1.21832	-5.19074	16	0.02	0.00125
GO:0044237_cellular_metabolism	UQCRFS1	5028	211	1.21832	-5.19074	16	0.02	0.00125
GO:0044237_cellular_metabolism	NDUFB8	5028	211	1.21832	-5.19074	16	0.02	0.00125
GO:0044237_cellular_metabolism	RBPSUH	5028	211	1.21832	-5.19074	16	0.02	0.00125
GO:0044237_cellular_metabolism	ATP5J	5028	211	1.21832	-5.19074	16	0.02	0.00125
GO:0044237_cellular_metabolism	PDHA1	5028	211	1.21832	-5.19074	16	0.02	0.00125
GO:0044237_cellular_metabolism	NARS	5028	211	1.21832	-5.19074	16	0.02	0.00125
GO:0044237_cellular_metabolism	OPN3	5028	211	1.21832	-5.19074	16	0.02	0.00125
GO:0044237_cellular_metabolism	RBM9	5028	211	1.21832	-5.19074	16	0.02	0.00125
GO:0044237_cellular_metabolism	NME3	5028	211	1.21832	-5.19074	16	0.02	0.00125
GO:0044237_cellular_metabolism	ACN9	5028	211	1.21832	-5.19074	16	0.02	0.00125
GO:0044237_cellular_metabolism	C1S	5028	211	1.21832	-5.19074	16	0.02	0.00125
GO:0044237_cellular_metabolism	MYC	5028	211	1.21832	-5.19074	16	0.02	0.00125
GO:0044237_cellular_metabolism	RXRG	5028	211	1.21832	-5.19074	16	0.02	0.00125
GO:0044237_cellular_metabolism	ATP5I	5028	211	1.21832	-5.19074	16	0.02	0.00125
GO:0044237_cellular_metabolism	ALS2CR2	5028	211	1.21832	-5.19074	16	0.02	0.00125
GO:0044237_cellular_metabolism	CDO1	5028	211	1.21832	-5.19074	16	0.02	0.00125
GO:0044237_cellular_metabolism	ZNF226	5028	211	1.21832	-5.19074	16	0.02	0.00125
GO:0044237_cellular_metabolism	PTGES2	5028	211	1.21832	-5.19074	16	0.02	0.00125
GO:0044237_cellular_metabolism	DPF2	5028	211	1.21832	-5.19074	16	0.02	0.00125
GO:0044237_cellular_metabolism	ATP5G3	5028	211	1.21832	-5.19074	16	0.02	0.00125
GO:0044237_cellular_metabolism	MRPS5	5028	211	1.21832	-5.19074	16	0.02	0.00125
GO:0044237_cellular_metabolism	HNRPAB	5028	211	1.21832	-5.19074	16	0.02	0.00125
GO:0044237_cellular_metabolism	INPP1	5028	211	1.21832	-5.19074	16	0.02	0.00125
GO:0044237_cellular_metabolism	ZNF264	5028	211	1.21832	-5.19074	16	0.02	0.00125
GO:0044237_cellular_metabolism	HSD11B1	5028	211	1.21832	-5.19074	16	0.02	0.00125
GO:0044237_cellular_metabolism	PRKAG1	5028	211	1.21832	-5.19074	16	0.02	0.00125
GO:0044237_cellular_metabolism	MAFG	5028	211	1.21832	-5.19074	16	0.02	0.00125
GO:0044237_cellular_metabolism	SIRT4	5028	211	1.21832	-5.19074	16	0.02	0.00125
GO:0044237_cellular_metabolism	PMSCL2	5028	211	1.21832	-5.19074	16	0.02	0.00125
GO:0044237_cellular_metabolism	GOT2	5028	211	1.21832	-5.19074	16	0.02	0.00125
GO:0044237_cellular_metabolism	NME2	5028	211	1.21832	-5.19074	16	0.02	0.00125
GO:0044237_cellular_metabolism	MRPL34	5028	211	1.21832	-5.19074	16	0.02	0.00125
GO:0044237_cellular_metabolism	NUP62	5028	211	1.21832	-5.19074	16	0.02	0.00125
GO:0044237_cellular_metabolism	IDH3A	5028	211	1.21832	-5.19074	16	0.02	0.00125
GO:0044237_cellular_metabolism	MRPL35	5028	211	1.21832	-5.19074	16	0.02	0.00125
GO:0044237_cellular_metabolism	HOXB2	5028	211	1.21832	-5.19074	16	0.02	0.00125
GO:0044237_cellular_metabolism	CHTF18	5028	211	1.21832	-5.19074	16	0.02	0.00125
GO:0044237_cellular_metabolism	AGXT2L1	5028	211	1.21832	-5.19074	16	0.02	0.00125
GO:0044237_cellular_metabolism	TUBA2	5028	211	1.21832	-5.19074	16	0.02	0.00125
GO:0044237_cellular_metabolism	MCM7	5028	211	1.21832	-5.19074	16	0.02	0.00125
GO:0044237_cellular_metabolism	SLC7A6	5028	211	1.21832	-5.19074	16	0.02	0.00125
GO:0044237_cellular_metabolism	TAF6L	5028	211	1.21832	-5.19074	16	0.02	0.00125
GO:0044237_cellular_metabolism	CRKL	5028	211	1.21832	-5.19074	16	0.02	0.00125
GO:0044237_cellular_metabolism	PTPLA	5028	211	1.21832	-5.19074	16	0.02	0.00125
GO:0044237_cellular_metabolism	FBXO22	5028	211	1.21832	-5.19074	16	0.02	0.00125
GO:0044237_cellular_metabolism	FBXO21	5028	211	1.21832	-5.19074	16	0.02	0.00125
GO:0044237_cellular_metabolism	LYPLA1	5028	211	1.21832	-5.19074	16	0.02	0.00125
GO:0044237_cellular_metabolism	LSM10	5028	211	1.21832	-5.19074	16	0.02	0.00125
GO:0044237_cellular_metabolism	COX10	5028	211	1.21832	-5.19074	16	0.02	0.00125
GO:0044237_cellular_metabolism	NDUFS3	5028	211	1.21832	-5.19074	16	0.02	0.00125
GO:0044237_cellular_metabolism	APG-1	5028	211	1.21832	-5.19074	16	0.02	0.00125
GO:0044237_cellular_metabolism	AK2	5028	211	1.21832	-5.19074	16	0.02	0.00125
GO:0044237_cellular_metabolism	MTMR4	5028	211	1.21832	-5.19074	16	0.02	0.00125
GO:0044237_cellular_metabolism	PCCA	5028	211	1.21832	-5.19074	16	0.02	0.00125
GO:0044237_cellular_metabolism	ZNF415	5028	211	1.21832	-5.19074	16	0.02	0.00125
GO:0044237_cellular_metabolism	PABPC4	5028	211	1.21832	-5.19074	16	0.02	0.00125
GO:0044237_cellular_metabolism	HNRPA2B1	5028	211	1.21832	-5.19074	16	0.02	0.00125
GO:0044237_cellular_metabolism	ENPP5	5028	211	1.21832	-5.19074	16	0.02	0.00125
GO:0044237_cellular_metabolism	MOCS2	5028	211	1.21832	-5.19074	16	0.02	0.00125
GO:0044237_cellular_metabolism	SIAT8E	5028	211	1.21832	-5.19074	16	0.02	0.00125
GO:0044237_cellular_metabolism	SORD	5028	211	1.21832	-5.19074	16	0.02	0.00125
GO:0044237_cellular_metabolism	MARK1	5028	211	1.21832	-5.19074	16	0.02	0.00125
GO:0044237_cellular_metabolism	CGBP	5028	211	1.21832	-5.19074	16	0.02	0.00125
GO:0044237_cellular_metabolism	RNF144	5028	211	1.21832	-5.19074	16	0.02	0.00125
GO:0044237_cellular_metabolism	FRDA	5028	211	1.21832	-5.19074	16	0.02	0.00125
GO:0044237_cellular_metabolism	SUCLG1	5028	211	1.21832	-5.19074	16	0.02	0.00125
GO:0044237_cellular_metabolism	SF3B2	5028	211	1.21832	-5.19074	16	0.02	0.00125
GO:0044237_cellular_metabolism	MAN2A1	5028	211	1.21832	-5.19074	16	0.02	0.00125
GO:0044237_cellular_metabolism	F13A1	5028	211	1.21832	-5.19074	16	0.02	0.00125
GO:0044237_cellular_metabolism	CRIM1	5028	211	1.21832	-5.19074	16	0.02	0.00125
GO:0044237_cellular_metabolism	FOXC1	5028	211	1.21832	-5.19074	16	0.02	0.00125
GO:0044237_cellular_metabolism	MAP3K5	5028	211	1.21832	-5.19074	16	0.02	0.00125
GO:0044237_cellular_metabolism	KLF13	5028	211	1.21832	-5.19074	16	0.02	0.00125
GO:0044237_cellular_metabolism	XRCC2	5028	211	1.21832	-5.19074	16	0.02	0.00125
GO:0044237_cellular_metabolism	FAAH	5028	211	1.21832	-5.19074	16	0.02	0.00125
GO:0044237_cellular_metabolism	NKTR	5028	211	1.21832	-5.19074	16	0.02	0.00125
GO:0044237_cellular_metabolism	DUSP19	5028	211	1.21832	-5.19074	16	0.02	0.00125
GO:0044237_cellular_metabolism	SDHB	5028	211	1.21832	-5.19074	16	0.02	0.00125
GO:0044237_cellular_metabolism	MGST2	5028	211	1.21832	-5.19074	16	0.02	0.00125
GO:0044237_cellular_metabolism	BHLHB3	5028	211	1.21832	-5.19074	16	0.02	0.00125
GO:0044237_cellular_metabolism	RPS6KC1	5028	211	1.21832	-5.19074	16	0.02	0.00125
GO:0044237_cellular_metabolism	HPGD	5028	211	1.21832	-5.19074	16	0.02	0.00125
GO:0044237_cellular_metabolism	FKBP14	5028	211	1.21832	-5.19074	16	0.02	0.00125
GO:0044237_cellular_metabolism	SIN3A	5028	211	1.21832	-5.19074	16	0.02	0.00125
GO:0044237_cellular_metabolism	FANCG	5028	211	1.21832	-5.19074	16	0.02	0.00125
GO:0044237_cellular_metabolism	ADAMTS5	5028	211	1.21832	-5.19074	16	0.02	0.00125
GO:0044237_cellular_metabolism	MIPEP	5028	211	1.21832	-5.19074	16	0.02	0.00125
GO:0044237_cellular_metabolism	FOXO1A	5028	211	1.21832	-5.19074	16	0.02	0.00125
GO:0044237_cellular_metabolism	CEBPB	5028	211	1.21832	-5.19074	16	0.02	0.00125
GO:0044237_cellular_metabolism	SOX15	5028	211	1.21832	-5.19074	16	0.02	0.00125
GO:0044237_cellular_metabolism	PKM2	5028	211	1.21832	-5.19074	16	0.02	0.00125
GO:0044237_cellular_metabolism	RFX1	5028	211	1.21832	-5.19074	16	0.02	0.00125
GO:0044237_cellular_metabolism	TPI1	5028	211	1.21832	-5.19074	16	0.02	0.00125
GO:0044237_cellular_metabolism	NR1D1	5028	211	1.21832	-5.19074	16	0.02	0.00125
GO:0044237_cellular_metabolism	ASXL1	5028	211	1.21832	-5.19074	16	0.02	0.00125
GO:0044237_cellular_metabolism	FDXR	5028	211	1.21832	-5.19074	16	0.02	0.00125
GO:0044237_cellular_metabolism	CKMT2	5028	211	1.21832	-5.19074	16	0.02	0.00125
GO:0044237_cellular_metabolism	PDCD8	5028	211	1.21832	-5.19074	16	0.02	0.00125
GO:0044237_cellular_metabolism	APG12L	5028	211	1.21832	-5.19074	16	0.02	0.00125
GO:0044237_cellular_metabolism	SDHC	5028	211	1.21832	-5.19074	16	0.02	0.00125
GO:0044237_cellular_metabolism	CREB1	5028	211	1.21832	-5.19074	16	0.02	0.00125
GO:0044237_cellular_metabolism	FOSL2	5028	211	1.21832	-5.19074	16	0.02	0.00125
GO:0044237_cellular_metabolism	PTPN3	5028	211	1.21832	-5.19074	16	0.02	0.00125
GO:0008152_metabolism	CRY2	5338	221	1.20196	-5.16013	17	0.03	0.001765
GO:0008152_metabolism	DCOHM	5338	221	1.20196	-5.16013	17	0.03	0.001765
GO:0008152_metabolism	HDAC4	5338	221	1.20196	-5.16013	17	0.03	0.001765
GO:0008152_metabolism	ZNF274	5338	221	1.20196	-5.16013	17	0.03	0.001765
GO:0008152_metabolism	PITPNM1	5338	221	1.20196	-5.16013	17	0.03	0.001765
GO:0008152_metabolism	UQCRC2	5338	221	1.20196	-5.16013	17	0.03	0.001765
GO:0008152_metabolism	EIF4EBP1	5338	221	1.20196	-5.16013	17	0.03	0.001765
GO:0008152_metabolism	UXS1	5338	221	1.20196	-5.16013	17	0.03	0.001765
GO:0008152_metabolism	ALDH1B1	5338	221	1.20196	-5.16013	17	0.03	0.001765
GO:0008152_metabolism	HCCS	5338	221	1.20196	-5.16013	17	0.03	0.001765
GO:0008152_metabolism	TARS	5338	221	1.20196	-5.16013	17	0.03	0.001765
GO:0008152_metabolism	ATP5C1	5338	221	1.20196	-5.16013	17	0.03	0.001765
GO:0008152_metabolism	DLD	5338	221	1.20196	-5.16013	17	0.03	0.001765
GO:0008152_metabolism	DDX17	5338	221	1.20196	-5.16013	17	0.03	0.001765
GO:0008152_metabolism	CRYAB	5338	221	1.20196	-5.16013	17	0.03	0.001765
GO:0008152_metabolism	HSD17B7	5338	221	1.20196	-5.16013	17	0.03	0.001765
GO:0008152_metabolism	APOD	5338	221	1.20196	-5.16013	17	0.03	0.001765
GO:0008152_metabolism	JUND	5338	221	1.20196	-5.16013	17	0.03	0.001765
GO:0008152_metabolism	MRPS33	5338	221	1.20196	-5.16013	17	0.03	0.001765
GO:0008152_metabolism	ZNF32	5338	221	1.20196	-5.16013	17	0.03	0.001765
GO:0008152_metabolism	BRF2	5338	221	1.20196	-5.16013	17	0.03	0.001765
GO:0008152_metabolism	UBP1	5338	221	1.20196	-5.16013	17	0.03	0.001765
GO:0008152_metabolism	HDAC5	5338	221	1.20196	-5.16013	17	0.03	0.001765
GO:0008152_metabolism	NFX1	5338	221	1.20196	-5.16013	17	0.03	0.001765
GO:0008152_metabolism	ZNF430	5338	221	1.20196	-5.16013	17	0.03	0.001765
GO:0008152_metabolism	LTB4DH	5338	221	1.20196	-5.16013	17	0.03	0.001765
GO:0008152_metabolism	ATBF1	5338	221	1.20196	-5.16013	17	0.03	0.001765
GO:0008152_metabolism	RBM5	5338	221	1.20196	-5.16013	17	0.03	0.001765
GO:0008152_metabolism	SFRS4	5338	221	1.20196	-5.16013	17	0.03	0.001765
GO:0008152_metabolism	HPN	5338	221	1.20196	-5.16013	17	0.03	0.001765
GO:0008152_metabolism	PLCE1	5338	221	1.20196	-5.16013	17	0.03	0.001765
GO:0008152_metabolism	SMT3H1	5338	221	1.20196	-5.16013	17	0.03	0.001765
GO:0008152_metabolism	MTIF2	5338	221	1.20196	-5.16013	17	0.03	0.001765
GO:0008152_metabolism	MRPS18B	5338	221	1.20196	-5.16013	17	0.03	0.001765
GO:0008152_metabolism	EIF2C4	5338	221	1.20196	-5.16013	17	0.03	0.001765
GO:0008152_metabolism	RABGGTB	5338	221	1.20196	-5.16013	17	0.03	0.001765
GO:0008152_metabolism	GGTL3	5338	221	1.20196	-5.16013	17	0.03	0.001765
GO:0008152_metabolism	NDUFA9	5338	221	1.20196	-5.16013	17	0.03	0.001765
GO:0008152_metabolism	PECI	5338	221	1.20196	-5.16013	17	0.03	0.001765
GO:0008152_metabolism	LIPT1	5338	221	1.20196	-5.16013	17	0.03	0.001765
GO:0008152_metabolism	SUCLA2	5338	221	1.20196	-5.16013	17	0.03	0.001765
GO:0008152_metabolism	ATP5H	5338	221	1.20196	-5.16013	17	0.03	0.001765
GO:0008152_metabolism	CS	5338	221	1.20196	-5.16013	17	0.03	0.001765
GO:0008152_metabolism	POMT1	5338	221	1.20196	-5.16013	17	0.03	0.001765
GO:0008152_metabolism	NNT	5338	221	1.20196	-5.16013	17	0.03	0.001765
GO:0008152_metabolism	TEP1	5338	221	1.20196	-5.16013	17	0.03	0.001765
GO:0008152_metabolism	XBP1	5338	221	1.20196	-5.16013	17	0.03	0.001765
GO:0008152_metabolism	PPIF	5338	221	1.20196	-5.16013	17	0.03	0.001765
GO:0008152_metabolism	COPS5	5338	221	1.20196	-5.16013	17	0.03	0.001765
GO:0008152_metabolism	CTH	5338	221	1.20196	-5.16013	17	0.03	0.001765
GO:0008152_metabolism	DLAT	5338	221	1.20196	-5.16013	17	0.03	0.001765
GO:0008152_metabolism	SLBP	5338	221	1.20196	-5.16013	17	0.03	0.001765
GO:0008152_metabolism	AARS	5338	221	1.20196	-5.16013	17	0.03	0.001765
GO:0008152_metabolism	MRPS16	5338	221	1.20196	-5.16013	17	0.03	0.001765
GO:0008152_metabolism	PDHB	5338	221	1.20196	-5.16013	17	0.03	0.001765
GO:0008152_metabolism	RAD51L1	5338	221	1.20196	-5.16013	17	0.03	0.001765
GO:0008152_metabolism	VLDLR	5338	221	1.20196	-5.16013	17	0.03	0.001765
GO:0008152_metabolism	DATF1	5338	221	1.20196	-5.16013	17	0.03	0.001765
GO:0008152_metabolism	TTF2	5338	221	1.20196	-5.16013	17	0.03	0.001765
GO:0008152_metabolism	GLRX2	5338	221	1.20196	-5.16013	17	0.03	0.001765
GO:0008152_metabolism	COX7A3	5338	221	1.20196	-5.16013	17	0.03	0.001765
GO:0008152_metabolism	CCNL2	5338	221	1.20196	-5.16013	17	0.03	0.001765
GO:0008152_metabolism	UQCRB	5338	221	1.20196	-5.16013	17	0.03	0.001765
GO:0008152_metabolism	DMRT2	5338	221	1.20196	-5.16013	17	0.03	0.001765
GO:0008152_metabolism	CBLB	5338	221	1.20196	-5.16013	17	0.03	0.001765
GO:0008152_metabolism	HMBS	5338	221	1.20196	-5.16013	17	0.03	0.001765
GO:0008152_metabolism	DCLRE1C	5338	221	1.20196	-5.16013	17	0.03	0.001765
GO:0008152_metabolism	CYP1B1	5338	221	1.20196	-5.16013	17	0.03	0.001765
GO:0008152_metabolism	CYCS	5338	221	1.20196	-5.16013	17	0.03	0.001765
GO:0008152_metabolism	TAZ	5338	221	1.20196	-5.16013	17	0.03	0.001765
GO:0008152_metabolism	SIRT5	5338	221	1.20196	-5.16013	17	0.03	0.001765
GO:0008152_metabolism	SNAI2	5338	221	1.20196	-5.16013	17	0.03	0.001765
GO:0008152_metabolism	TP73L	5338	221	1.20196	-5.16013	17	0.03	0.001765
GO:0008152_metabolism	HIBADH	5338	221	1.20196	-5.16013	17	0.03	0.001765
GO:0008152_metabolism	ATM	5338	221	1.20196	-5.16013	17	0.03	0.001765
GO:0008152_metabolism	ADH1A	5338	221	1.20196	-5.16013	17	0.03	0.001765
GO:0008152_metabolism	MTO1	5338	221	1.20196	-5.16013	17	0.03	0.001765
GO:0008152_metabolism	FUT6	5338	221	1.20196	-5.16013	17	0.03	0.001765
GO:0008152_metabolism	MRPL15	5338	221	1.20196	-5.16013	17	0.03	0.001765
GO:0008152_metabolism	ZNF454	5338	221	1.20196	-5.16013	17	0.03	0.001765
GO:0008152_metabolism	UQCRH	5338	221	1.20196	-5.16013	17	0.03	0.001765
GO:0008152_metabolism	H1FX	5338	221	1.20196	-5.16013	17	0.03	0.001765
GO:0008152_metabolism	ZNF266	5338	221	1.20196	-5.16013	17	0.03	0.001765
GO:0008152_metabolism	HMGN2	5338	221	1.20196	-5.16013	17	0.03	0.001765
GO:0008152_metabolism	NDUFB3	5338	221	1.20196	-5.16013	17	0.03	0.001765
GO:0008152_metabolism	DNAJC7	5338	221	1.20196	-5.16013	17	0.03	0.001765
GO:0008152_metabolism	UCHL3	5338	221	1.20196	-5.16013	17	0.03	0.001765
GO:0008152_metabolism	KLF5	5338	221	1.20196	-5.16013	17	0.03	0.001765
GO:0008152_metabolism	MIZ1	5338	221	1.20196	-5.16013	17	0.03	0.001765
GO:0008152_metabolism	ZNF91	5338	221	1.20196	-5.16013	17	0.03	0.001765
GO:0008152_metabolism	OXA1L	5338	221	1.20196	-5.16013	17	0.03	0.001765
GO:0008152_metabolism	MRPL13	5338	221	1.20196	-5.16013	17	0.03	0.001765
GO:0008152_metabolism	RING1	5338	221	1.20196	-5.16013	17	0.03	0.001765
GO:0008152_metabolism	HIBCH	5338	221	1.20196	-5.16013	17	0.03	0.001765
GO:0008152_metabolism	TAF9	5338	221	1.20196	-5.16013	17	0.03	0.001765
GO:0008152_metabolism	COQ3	5338	221	1.20196	-5.16013	17	0.03	0.001765
GO:0008152_metabolism	HNRPM	5338	221	1.20196	-5.16013	17	0.03	0.001765
GO:0008152_metabolism	SPHK2	5338	221	1.20196	-5.16013	17	0.03	0.001765
GO:0008152_metabolism	MKKS	5338	221	1.20196	-5.16013	17	0.03	0.001765
GO:0008152_metabolism	ADH1B	5338	221	1.20196	-5.16013	17	0.03	0.001765
GO:0008152_metabolism	PECR	5338	221	1.20196	-5.16013	17	0.03	0.001765
GO:0008152_metabolism	GADD45G	5338	221	1.20196	-5.16013	17	0.03	0.001765
GO:0008152_metabolism	MRPL49	5338	221	1.20196	-5.16013	17	0.03	0.001765
GO:0008152_metabolism	ASMTL	5338	221	1.20196	-5.16013	17	0.03	0.001765
GO:0008152_metabolism	IDH1	5338	221	1.20196	-5.16013	17	0.03	0.001765
GO:0008152_metabolism	CDC14B	5338	221	1.20196	-5.16013	17	0.03	0.001765
GO:0008152_metabolism	TAF5	5338	221	1.20196	-5.16013	17	0.03	0.001765
GO:0008152_metabolism	UQCRC1	5338	221	1.20196	-5.16013	17	0.03	0.001765
GO:0008152_metabolism	PLA2G4B	5338	221	1.20196	-5.16013	17	0.03	0.001765
GO:0008152_metabolism	NDUFS2	5338	221	1.20196	-5.16013	17	0.03	0.001765
GO:0008152_metabolism	DDX23	5338	221	1.20196	-5.16013	17	0.03	0.001765
GO:0008152_metabolism	ETFDH	5338	221	1.20196	-5.16013	17	0.03	0.001765
GO:0008152_metabolism	UQCRFS1	5338	221	1.20196	-5.16013	17	0.03	0.001765
GO:0008152_metabolism	NDUFB8	5338	221	1.20196	-5.16013	17	0.03	0.001765
GO:0008152_metabolism	RBPSUH	5338	221	1.20196	-5.16013	17	0.03	0.001765
GO:0008152_metabolism	ATP5J	5338	221	1.20196	-5.16013	17	0.03	0.001765
GO:0008152_metabolism	PDHA1	5338	221	1.20196	-5.16013	17	0.03	0.001765
GO:0008152_metabolism	NARS	5338	221	1.20196	-5.16013	17	0.03	0.001765
GO:0008152_metabolism	OPN3	5338	221	1.20196	-5.16013	17	0.03	0.001765
GO:0008152_metabolism	RBM9	5338	221	1.20196	-5.16013	17	0.03	0.001765
GO:0008152_metabolism	NME3	5338	221	1.20196	-5.16013	17	0.03	0.001765
GO:0008152_metabolism	ACN9	5338	221	1.20196	-5.16013	17	0.03	0.001765
GO:0008152_metabolism	C1S	5338	221	1.20196	-5.16013	17	0.03	0.001765
GO:0008152_metabolism	RXRG	5338	221	1.20196	-5.16013	17	0.03	0.001765
GO:0008152_metabolism	MYC	5338	221	1.20196	-5.16013	17	0.03	0.001765
GO:0008152_metabolism	ATP5I	5338	221	1.20196	-5.16013	17	0.03	0.001765
GO:0008152_metabolism	ALS2CR2	5338	221	1.20196	-5.16013	17	0.03	0.001765
GO:0008152_metabolism	CDO1	5338	221	1.20196	-5.16013	17	0.03	0.001765
GO:0008152_metabolism	ZNF226	5338	221	1.20196	-5.16013	17	0.03	0.001765
GO:0008152_metabolism	DPF2	5338	221	1.20196	-5.16013	17	0.03	0.001765
GO:0008152_metabolism	PTGES2	5338	221	1.20196	-5.16013	17	0.03	0.001765
GO:0008152_metabolism	ATP5G3	5338	221	1.20196	-5.16013	17	0.03	0.001765
GO:0008152_metabolism	MRPS5	5338	221	1.20196	-5.16013	17	0.03	0.001765
GO:0008152_metabolism	HNRPAB	5338	221	1.20196	-5.16013	17	0.03	0.001765
GO:0008152_metabolism	INPP1	5338	221	1.20196	-5.16013	17	0.03	0.001765
GO:0008152_metabolism	ZNF264	5338	221	1.20196	-5.16013	17	0.03	0.001765
GO:0008152_metabolism	HSD11B1	5338	221	1.20196	-5.16013	17	0.03	0.001765
GO:0008152_metabolism	PRKAG1	5338	221	1.20196	-5.16013	17	0.03	0.001765
GO:0008152_metabolism	MAFG	5338	221	1.20196	-5.16013	17	0.03	0.001765
GO:0008152_metabolism	SIRT4	5338	221	1.20196	-5.16013	17	0.03	0.001765
GO:0008152_metabolism	PMSCL2	5338	221	1.20196	-5.16013	17	0.03	0.001765
GO:0008152_metabolism	GOT2	5338	221	1.20196	-5.16013	17	0.03	0.001765
GO:0008152_metabolism	NME2	5338	221	1.20196	-5.16013	17	0.03	0.001765
GO:0008152_metabolism	PAFAH1B3	5338	221	1.20196	-5.16013	17	0.03	0.001765
GO:0008152_metabolism	MRPL34	5338	221	1.20196	-5.16013	17	0.03	0.001765
GO:0008152_metabolism	NUP62	5338	221	1.20196	-5.16013	17	0.03	0.001765
GO:0008152_metabolism	SCAP2	5338	221	1.20196	-5.16013	17	0.03	0.001765
GO:0008152_metabolism	IDH3A	5338	221	1.20196	-5.16013	17	0.03	0.001765
GO:0008152_metabolism	MRPL35	5338	221	1.20196	-5.16013	17	0.03	0.001765
GO:0008152_metabolism	HOXB2	5338	221	1.20196	-5.16013	17	0.03	0.001765
GO:0008152_metabolism	CHTF18	5338	221	1.20196	-5.16013	17	0.03	0.001765
GO:0008152_metabolism	AGXT2L1	5338	221	1.20196	-5.16013	17	0.03	0.001765
GO:0008152_metabolism	SLC7A6	5338	221	1.20196	-5.16013	17	0.03	0.001765
GO:0008152_metabolism	MCM7	5338	221	1.20196	-5.16013	17	0.03	0.001765
GO:0008152_metabolism	TUBA2	5338	221	1.20196	-5.16013	17	0.03	0.001765
GO:0008152_metabolism	NEU1	5338	221	1.20196	-5.16013	17	0.03	0.001765
GO:0008152_metabolism	TAF6L	5338	221	1.20196	-5.16013	17	0.03	0.001765
GO:0008152_metabolism	CRKL	5338	221	1.20196	-5.16013	17	0.03	0.001765
GO:0008152_metabolism	PTPLA	5338	221	1.20196	-5.16013	17	0.03	0.001765
GO:0008152_metabolism	FBXO22	5338	221	1.20196	-5.16013	17	0.03	0.001765
GO:0008152_metabolism	FBXO21	5338	221	1.20196	-5.16013	17	0.03	0.001765
GO:0008152_metabolism	LYPLA1	5338	221	1.20196	-5.16013	17	0.03	0.001765
GO:0008152_metabolism	LSM10	5338	221	1.20196	-5.16013	17	0.03	0.001765
GO:0008152_metabolism	COX10	5338	221	1.20196	-5.16013	17	0.03	0.001765
GO:0008152_metabolism	NDUFS3	5338	221	1.20196	-5.16013	17	0.03	0.001765
GO:0008152_metabolism	APG-1	5338	221	1.20196	-5.16013	17	0.03	0.001765
GO:0008152_metabolism	AK2	5338	221	1.20196	-5.16013	17	0.03	0.001765
GO:0008152_metabolism	MTMR4	5338	221	1.20196	-5.16013	17	0.03	0.001765
GO:0008152_metabolism	PCCA	5338	221	1.20196	-5.16013	17	0.03	0.001765
GO:0008152_metabolism	ZNF415	5338	221	1.20196	-5.16013	17	0.03	0.001765
GO:0008152_metabolism	DECR1	5338	221	1.20196	-5.16013	17	0.03	0.001765
GO:0008152_metabolism	PABPC4	5338	221	1.20196	-5.16013	17	0.03	0.001765
GO:0008152_metabolism	HNRPA2B1	5338	221	1.20196	-5.16013	17	0.03	0.001765
GO:0008152_metabolism	ENPP5	5338	221	1.20196	-5.16013	17	0.03	0.001765
GO:0008152_metabolism	MOCS2	5338	221	1.20196	-5.16013	17	0.03	0.001765
GO:0008152_metabolism	SIAT8E	5338	221	1.20196	-5.16013	17	0.03	0.001765
GO:0008152_metabolism	SORD	5338	221	1.20196	-5.16013	17	0.03	0.001765
GO:0008152_metabolism	MARK1	5338	221	1.20196	-5.16013	17	0.03	0.001765
GO:0008152_metabolism	CGBP	5338	221	1.20196	-5.16013	17	0.03	0.001765
GO:0008152_metabolism	RNF144	5338	221	1.20196	-5.16013	17	0.03	0.001765
GO:0008152_metabolism	OCRL	5338	221	1.20196	-5.16013	17	0.03	0.001765
GO:0008152_metabolism	FRDA	5338	221	1.20196	-5.16013	17	0.03	0.001765
GO:0008152_metabolism	SUCLG1	5338	221	1.20196	-5.16013	17	0.03	0.001765
GO:0008152_metabolism	SF3B2	5338	221	1.20196	-5.16013	17	0.03	0.001765
GO:0008152_metabolism	MAN2A1	5338	221	1.20196	-5.16013	17	0.03	0.001765
GO:0008152_metabolism	F13A1	5338	221	1.20196	-5.16013	17	0.03	0.001765
GO:0008152_metabolism	FOXC1	5338	221	1.20196	-5.16013	17	0.03	0.001765
GO:0008152_metabolism	MAP3K5	5338	221	1.20196	-5.16013	17	0.03	0.001765
GO:0008152_metabolism	CRIM1	5338	221	1.20196	-5.16013	17	0.03	0.001765
GO:0008152_metabolism	KLF13	5338	221	1.20196	-5.16013	17	0.03	0.001765
GO:0008152_metabolism	XRCC2	5338	221	1.20196	-5.16013	17	0.03	0.001765
GO:0008152_metabolism	FAAH	5338	221	1.20196	-5.16013	17	0.03	0.001765
GO:0008152_metabolism	NKTR	5338	221	1.20196	-5.16013	17	0.03	0.001765
GO:0008152_metabolism	DUSP19	5338	221	1.20196	-5.16013	17	0.03	0.001765
GO:0008152_metabolism	SDHB	5338	221	1.20196	-5.16013	17	0.03	0.001765
GO:0008152_metabolism	MGST2	5338	221	1.20196	-5.16013	17	0.03	0.001765
GO:0008152_metabolism	BHLHB3	5338	221	1.20196	-5.16013	17	0.03	0.001765
GO:0008152_metabolism	RPS6KC1	5338	221	1.20196	-5.16013	17	0.03	0.001765
GO:0008152_metabolism	HPGD	5338	221	1.20196	-5.16013	17	0.03	0.001765
GO:0008152_metabolism	FKBP14	5338	221	1.20196	-5.16013	17	0.03	0.001765
GO:0008152_metabolism	SIN3A	5338	221	1.20196	-5.16013	17	0.03	0.001765
GO:0008152_metabolism	FANCG	5338	221	1.20196	-5.16013	17	0.03	0.001765
GO:0008152_metabolism	MIPEP	5338	221	1.20196	-5.16013	17	0.03	0.001765
GO:0008152_metabolism	ADAMTS5	5338	221	1.20196	-5.16013	17	0.03	0.001765
GO:0008152_metabolism	FOXO1A	5338	221	1.20196	-5.16013	17	0.03	0.001765
GO:0008152_metabolism	CEBPB	5338	221	1.20196	-5.16013	17	0.03	0.001765
GO:0008152_metabolism	SOX15	5338	221	1.20196	-5.16013	17	0.03	0.001765
GO:0008152_metabolism	PKM2	5338	221	1.20196	-5.16013	17	0.03	0.001765
GO:0008152_metabolism	RFX1	5338	221	1.20196	-5.16013	17	0.03	0.001765
GO:0008152_metabolism	TPI1	5338	221	1.20196	-5.16013	17	0.03	0.001765
GO:0008152_metabolism	NR1D1	5338	221	1.20196	-5.16013	17	0.03	0.001765
GO:0008152_metabolism	AP2B1	5338	221	1.20196	-5.16013	17	0.03	0.001765
GO:0008152_metabolism	ASXL1	5338	221	1.20196	-5.16013	17	0.03	0.001765
GO:0008152_metabolism	FDXR	5338	221	1.20196	-5.16013	17	0.03	0.001765
GO:0008152_metabolism	CKMT2	5338	221	1.20196	-5.16013	17	0.03	0.001765
GO:0008152_metabolism	PDCD8	5338	221	1.20196	-5.16013	17	0.03	0.001765
GO:0008152_metabolism	APG12L	5338	221	1.20196	-5.16013	17	0.03	0.001765
GO:0008152_metabolism	CREB1	5338	221	1.20196	-5.16013	17	0.03	0.001765
GO:0008152_metabolism	SDHC	5338	221	1.20196	-5.16013	17	0.03	0.001765
GO:0008152_metabolism	FOSL2	5338	221	1.20196	-5.16013	17	0.03	0.001765
GO:0008152_metabolism	PTPN3	5338	221	1.20196	-5.16013	17	0.03	0.001765
GO:0050875_cellular_physiological_process	CRY2	7197	278	1.12142	-5.34703	15	0.02	0.001333
GO:0050875_cellular_physiological_process	DCOHM	7197	278	1.12142	-5.34703	15	0.02	0.001333
GO:0050875_cellular_physiological_process	HDAC4	7197	278	1.12142	-5.34703	15	0.02	0.001333
GO:0050875_cellular_physiological_process	ZNF274	7197	278	1.12142	-5.34703	15	0.02	0.001333
GO:0050875_cellular_physiological_process	PITPNM1	7197	278	1.12142	-5.34703	15	0.02	0.001333
GO:0050875_cellular_physiological_process	UQCRC2	7197	278	1.12142	-5.34703	15	0.02	0.001333
GO:0050875_cellular_physiological_process	EIF4EBP1	7197	278	1.12142	-5.34703	15	0.02	0.001333
GO:0050875_cellular_physiological_process	UXS1	7197	278	1.12142	-5.34703	15	0.02	0.001333
GO:0050875_cellular_physiological_process	SLC25A11	7197	278	1.12142	-5.34703	15	0.02	0.001333
GO:0050875_cellular_physiological_process	HCCS	7197	278	1.12142	-5.34703	15	0.02	0.001333
GO:0050875_cellular_physiological_process	TARS	7197	278	1.12142	-5.34703	15	0.02	0.001333
GO:0050875_cellular_physiological_process	PEX16	7197	278	1.12142	-5.34703	15	0.02	0.001333
GO:0050875_cellular_physiological_process	ATP5C1	7197	278	1.12142	-5.34703	15	0.02	0.001333
GO:0050875_cellular_physiological_process	DLD	7197	278	1.12142	-5.34703	15	0.02	0.001333
GO:0050875_cellular_physiological_process	DDX17	7197	278	1.12142	-5.34703	15	0.02	0.001333
GO:0050875_cellular_physiological_process	CRYAB	7197	278	1.12142	-5.34703	15	0.02	0.001333
GO:0050875_cellular_physiological_process	HSD17B7	7197	278	1.12142	-5.34703	15	0.02	0.001333
GO:0050875_cellular_physiological_process	MRPS33	7197	278	1.12142	-5.34703	15	0.02	0.001333
GO:0050875_cellular_physiological_process	ZNF32	7197	278	1.12142	-5.34703	15	0.02	0.001333
GO:0050875_cellular_physiological_process	NUSAP1	7197	278	1.12142	-5.34703	15	0.02	0.001333
GO:0050875_cellular_physiological_process	APOD	7197	278	1.12142	-5.34703	15	0.02	0.001333
GO:0050875_cellular_physiological_process	JUND	7197	278	1.12142	-5.34703	15	0.02	0.001333
GO:0050875_cellular_physiological_process	BRF2	7197	278	1.12142	-5.34703	15	0.02	0.001333
GO:0050875_cellular_physiological_process	PCNT2	7197	278	1.12142	-5.34703	15	0.02	0.001333
GO:0050875_cellular_physiological_process	UBP1	7197	278	1.12142	-5.34703	15	0.02	0.001333
GO:0050875_cellular_physiological_process	HDAC5	7197	278	1.12142	-5.34703	15	0.02	0.001333
GO:0050875_cellular_physiological_process	NFX1	7197	278	1.12142	-5.34703	15	0.02	0.001333
GO:0050875_cellular_physiological_process	ABCA8	7197	278	1.12142	-5.34703	15	0.02	0.001333
GO:0050875_cellular_physiological_process	ARHGAP1	7197	278	1.12142	-5.34703	15	0.02	0.001333
GO:0050875_cellular_physiological_process	ZNF430	7197	278	1.12142	-5.34703	15	0.02	0.001333
GO:0050875_cellular_physiological_process	AP3S1	7197	278	1.12142	-5.34703	15	0.02	0.001333
GO:0050875_cellular_physiological_process	LTB4DH	7197	278	1.12142	-5.34703	15	0.02	0.001333
GO:0050875_cellular_physiological_process	WISP2	7197	278	1.12142	-5.34703	15	0.02	0.001333
GO:0050875_cellular_physiological_process	ATBF1	7197	278	1.12142	-5.34703	15	0.02	0.001333
GO:0050875_cellular_physiological_process	RBM5	7197	278	1.12142	-5.34703	15	0.02	0.001333
GO:0050875_cellular_physiological_process	SFRS4	7197	278	1.12142	-5.34703	15	0.02	0.001333
GO:0050875_cellular_physiological_process	HPN	7197	278	1.12142	-5.34703	15	0.02	0.001333
GO:0050875_cellular_physiological_process	SMT3H1	7197	278	1.12142	-5.34703	15	0.02	0.001333
GO:0050875_cellular_physiological_process	PLCE1	7197	278	1.12142	-5.34703	15	0.02	0.001333
GO:0050875_cellular_physiological_process	MTIF2	7197	278	1.12142	-5.34703	15	0.02	0.001333
GO:0050875_cellular_physiological_process	MRPS18B	7197	278	1.12142	-5.34703	15	0.02	0.001333
GO:0050875_cellular_physiological_process	EIF2C4	7197	278	1.12142	-5.34703	15	0.02	0.001333
GO:0050875_cellular_physiological_process	RABGGTB	7197	278	1.12142	-5.34703	15	0.02	0.001333
GO:0050875_cellular_physiological_process	HGS	7197	278	1.12142	-5.34703	15	0.02	0.001333
GO:0050875_cellular_physiological_process	GGTL3	7197	278	1.12142	-5.34703	15	0.02	0.001333
GO:0050875_cellular_physiological_process	NDUFA9	7197	278	1.12142	-5.34703	15	0.02	0.001333
GO:0050875_cellular_physiological_process	PECI	7197	278	1.12142	-5.34703	15	0.02	0.001333
GO:0050875_cellular_physiological_process	LIPT1	7197	278	1.12142	-5.34703	15	0.02	0.001333
GO:0050875_cellular_physiological_process	SUCLA2	7197	278	1.12142	-5.34703	15	0.02	0.001333
GO:0050875_cellular_physiological_process	RAB40C	7197	278	1.12142	-5.34703	15	0.02	0.001333
GO:0050875_cellular_physiological_process	SLC25A12	7197	278	1.12142	-5.34703	15	0.02	0.001333
GO:0050875_cellular_physiological_process	ATP5H	7197	278	1.12142	-5.34703	15	0.02	0.001333
GO:0050875_cellular_physiological_process	CDC26	7197	278	1.12142	-5.34703	15	0.02	0.001333
GO:0050875_cellular_physiological_process	POMT1	7197	278	1.12142	-5.34703	15	0.02	0.001333
GO:0050875_cellular_physiological_process	CS	7197	278	1.12142	-5.34703	15	0.02	0.001333
GO:0050875_cellular_physiological_process	AMOT	7197	278	1.12142	-5.34703	15	0.02	0.001333
GO:0050875_cellular_physiological_process	ABCD3	7197	278	1.12142	-5.34703	15	0.02	0.001333
GO:0050875_cellular_physiological_process	NNT	7197	278	1.12142	-5.34703	15	0.02	0.001333
GO:0050875_cellular_physiological_process	TEP1	7197	278	1.12142	-5.34703	15	0.02	0.001333
GO:0050875_cellular_physiological_process	RAB13	7197	278	1.12142	-5.34703	15	0.02	0.001333
GO:0050875_cellular_physiological_process	MRC1	7197	278	1.12142	-5.34703	15	0.02	0.001333
GO:0050875_cellular_physiological_process	ABLIM2	7197	278	1.12142	-5.34703	15	0.02	0.001333
GO:0050875_cellular_physiological_process	CD97	7197	278	1.12142	-5.34703	15	0.02	0.001333
GO:0050875_cellular_physiological_process	XBP1	7197	278	1.12142	-5.34703	15	0.02	0.001333
GO:0050875_cellular_physiological_process	KCNJ16	7197	278	1.12142	-5.34703	15	0.02	0.001333
GO:0050875_cellular_physiological_process	PPIF	7197	278	1.12142	-5.34703	15	0.02	0.001333
GO:0050875_cellular_physiological_process	MRS3/4	7197	278	1.12142	-5.34703	15	0.02	0.001333
GO:0050875_cellular_physiological_process	COPS5	7197	278	1.12142	-5.34703	15	0.02	0.001333
GO:0050875_cellular_physiological_process	LTBP2	7197	278	1.12142	-5.34703	15	0.02	0.001333
GO:0050875_cellular_physiological_process	CTH	7197	278	1.12142	-5.34703	15	0.02	0.001333
GO:0050875_cellular_physiological_process	SLC15A4	7197	278	1.12142	-5.34703	15	0.02	0.001333
GO:0050875_cellular_physiological_process	SLBP	7197	278	1.12142	-5.34703	15	0.02	0.001333
GO:0050875_cellular_physiological_process	DLAT	7197	278	1.12142	-5.34703	15	0.02	0.001333
GO:0050875_cellular_physiological_process	AARS	7197	278	1.12142	-5.34703	15	0.02	0.001333
GO:0050875_cellular_physiological_process	MRPS16	7197	278	1.12142	-5.34703	15	0.02	0.001333
GO:0050875_cellular_physiological_process	RAD51L1	7197	278	1.12142	-5.34703	15	0.02	0.001333
GO:0050875_cellular_physiological_process	PDHB	7197	278	1.12142	-5.34703	15	0.02	0.001333
GO:0050875_cellular_physiological_process	VLDLR	7197	278	1.12142	-5.34703	15	0.02	0.001333
GO:0050875_cellular_physiological_process	AKAP7	7197	278	1.12142	-5.34703	15	0.02	0.001333
GO:0050875_cellular_physiological_process	DATF1	7197	278	1.12142	-5.34703	15	0.02	0.001333
GO:0050875_cellular_physiological_process	TTF2	7197	278	1.12142	-5.34703	15	0.02	0.001333
GO:0050875_cellular_physiological_process	GLRX2	7197	278	1.12142	-5.34703	15	0.02	0.001333
GO:0050875_cellular_physiological_process	COX7A3	7197	278	1.12142	-5.34703	15	0.02	0.001333
GO:0050875_cellular_physiological_process	CCNL2	7197	278	1.12142	-5.34703	15	0.02	0.001333
GO:0050875_cellular_physiological_process	DMRT2	7197	278	1.12142	-5.34703	15	0.02	0.001333
GO:0050875_cellular_physiological_process	UQCRB	7197	278	1.12142	-5.34703	15	0.02	0.001333
GO:0050875_cellular_physiological_process	MADHIP	7197	278	1.12142	-5.34703	15	0.02	0.001333
GO:0050875_cellular_physiological_process	C1QB	7197	278	1.12142	-5.34703	15	0.02	0.001333
GO:0050875_cellular_physiological_process	CBLB	7197	278	1.12142	-5.34703	15	0.02	0.001333
GO:0050875_cellular_physiological_process	HMBS	7197	278	1.12142	-5.34703	15	0.02	0.001333
GO:0050875_cellular_physiological_process	DCLRE1C	7197	278	1.12142	-5.34703	15	0.02	0.001333
GO:0050875_cellular_physiological_process	CHAD	7197	278	1.12142	-5.34703	15	0.02	0.001333
GO:0050875_cellular_physiological_process	CYP1B1	7197	278	1.12142	-5.34703	15	0.02	0.001333
GO:0050875_cellular_physiological_process	CYCS	7197	278	1.12142	-5.34703	15	0.02	0.001333
GO:0050875_cellular_physiological_process	SFXN4	7197	278	1.12142	-5.34703	15	0.02	0.001333
GO:0050875_cellular_physiological_process	TAZ	7197	278	1.12142	-5.34703	15	0.02	0.001333
GO:0050875_cellular_physiological_process	SIRT5	7197	278	1.12142	-5.34703	15	0.02	0.001333
GO:0050875_cellular_physiological_process	SNAI2	7197	278	1.12142	-5.34703	15	0.02	0.001333
GO:0050875_cellular_physiological_process	TP73L	7197	278	1.12142	-5.34703	15	0.02	0.001333
GO:0050875_cellular_physiological_process	HIBADH	7197	278	1.12142	-5.34703	15	0.02	0.001333
GO:0050875_cellular_physiological_process	ATM	7197	278	1.12142	-5.34703	15	0.02	0.001333
GO:0050875_cellular_physiological_process	MTX2	7197	278	1.12142	-5.34703	15	0.02	0.001333
GO:0050875_cellular_physiological_process	ADH1A	7197	278	1.12142	-5.34703	15	0.02	0.001333
GO:0050875_cellular_physiological_process	MTO1	7197	278	1.12142	-5.34703	15	0.02	0.001333
GO:0050875_cellular_physiological_process	FUT6	7197	278	1.12142	-5.34703	15	0.02	0.001333
GO:0050875_cellular_physiological_process	MRPL15	7197	278	1.12142	-5.34703	15	0.02	0.001333
GO:0050875_cellular_physiological_process	ZNF454	7197	278	1.12142	-5.34703	15	0.02	0.001333
GO:0050875_cellular_physiological_process	UQCRH	7197	278	1.12142	-5.34703	15	0.02	0.001333
GO:0050875_cellular_physiological_process	H1FX	7197	278	1.12142	-5.34703	15	0.02	0.001333
GO:0050875_cellular_physiological_process	ZNF266	7197	278	1.12142	-5.34703	15	0.02	0.001333
GO:0050875_cellular_physiological_process	CD14	7197	278	1.12142	-5.34703	15	0.02	0.001333
GO:0050875_cellular_physiological_process	HMGN2	7197	278	1.12142	-5.34703	15	0.02	0.001333
GO:0050875_cellular_physiological_process	DNAJC7	7197	278	1.12142	-5.34703	15	0.02	0.001333
GO:0050875_cellular_physiological_process	NDUFB3	7197	278	1.12142	-5.34703	15	0.02	0.001333
GO:0050875_cellular_physiological_process	UCHL3	7197	278	1.12142	-5.34703	15	0.02	0.001333
GO:0050875_cellular_physiological_process	VIM	7197	278	1.12142	-5.34703	15	0.02	0.001333
GO:0050875_cellular_physiological_process	KLF5	7197	278	1.12142	-5.34703	15	0.02	0.001333
GO:0050875_cellular_physiological_process	SLC25A19	7197	278	1.12142	-5.34703	15	0.02	0.001333
GO:0050875_cellular_physiological_process	MIZ1	7197	278	1.12142	-5.34703	15	0.02	0.001333
GO:0050875_cellular_physiological_process	ZNF91	7197	278	1.12142	-5.34703	15	0.02	0.001333
GO:0050875_cellular_physiological_process	SCGF	7197	278	1.12142	-5.34703	15	0.02	0.001333
GO:0050875_cellular_physiological_process	OXA1L	7197	278	1.12142	-5.34703	15	0.02	0.001333
GO:0050875_cellular_physiological_process	MRPL13	7197	278	1.12142	-5.34703	15	0.02	0.001333
GO:0050875_cellular_physiological_process	RING1	7197	278	1.12142	-5.34703	15	0.02	0.001333
GO:0050875_cellular_physiological_process	COQ3	7197	278	1.12142	-5.34703	15	0.02	0.001333
GO:0050875_cellular_physiological_process	SCN4B	7197	278	1.12142	-5.34703	15	0.02	0.001333
GO:0050875_cellular_physiological_process	SLC16A3	7197	278	1.12142	-5.34703	15	0.02	0.001333
GO:0050875_cellular_physiological_process	TAF9	7197	278	1.12142	-5.34703	15	0.02	0.001333
GO:0050875_cellular_physiological_process	HNRPM	7197	278	1.12142	-5.34703	15	0.02	0.001333
GO:0050875_cellular_physiological_process	SPHK2	7197	278	1.12142	-5.34703	15	0.02	0.001333
GO:0050875_cellular_physiological_process	MKKS	7197	278	1.12142	-5.34703	15	0.02	0.001333
GO:0050875_cellular_physiological_process	FEZ2	7197	278	1.12142	-5.34703	15	0.02	0.001333
GO:0050875_cellular_physiological_process	AKAP8	7197	278	1.12142	-5.34703	15	0.02	0.001333
GO:0050875_cellular_physiological_process	ADH1B	7197	278	1.12142	-5.34703	15	0.02	0.001333
GO:0050875_cellular_physiological_process	PECR	7197	278	1.12142	-5.34703	15	0.02	0.001333
GO:0050875_cellular_physiological_process	GADD45G	7197	278	1.12142	-5.34703	15	0.02	0.001333
GO:0050875_cellular_physiological_process	MRPL49	7197	278	1.12142	-5.34703	15	0.02	0.001333
GO:0050875_cellular_physiological_process	ASMTL	7197	278	1.12142	-5.34703	15	0.02	0.001333
GO:0050875_cellular_physiological_process	IDH1	7197	278	1.12142	-5.34703	15	0.02	0.001333
GO:0050875_cellular_physiological_process	CDC14B	7197	278	1.12142	-5.34703	15	0.02	0.001333
GO:0050875_cellular_physiological_process	TAF5	7197	278	1.12142	-5.34703	15	0.02	0.001333
GO:0050875_cellular_physiological_process	UQCRC1	7197	278	1.12142	-5.34703	15	0.02	0.001333
GO:0050875_cellular_physiological_process	CDKN1A	7197	278	1.12142	-5.34703	15	0.02	0.001333
GO:0050875_cellular_physiological_process	PLA2G4B	7197	278	1.12142	-5.34703	15	0.02	0.001333
GO:0050875_cellular_physiological_process	NDUFS2	7197	278	1.12142	-5.34703	15	0.02	0.001333
GO:0050875_cellular_physiological_process	DDX23	7197	278	1.12142	-5.34703	15	0.02	0.001333
GO:0050875_cellular_physiological_process	ETFDH	7197	278	1.12142	-5.34703	15	0.02	0.001333
GO:0050875_cellular_physiological_process	EPB41L3	7197	278	1.12142	-5.34703	15	0.02	0.001333
GO:0050875_cellular_physiological_process	UQCRFS1	7197	278	1.12142	-5.34703	15	0.02	0.001333
GO:0050875_cellular_physiological_process	NDUFB8	7197	278	1.12142	-5.34703	15	0.02	0.001333
GO:0050875_cellular_physiological_process	ATP5J	7197	278	1.12142	-5.34703	15	0.02	0.001333
GO:0050875_cellular_physiological_process	PDHA1	7197	278	1.12142	-5.34703	15	0.02	0.001333
GO:0050875_cellular_physiological_process	RBPSUH	7197	278	1.12142	-5.34703	15	0.02	0.001333
GO:0050875_cellular_physiological_process	NARS	7197	278	1.12142	-5.34703	15	0.02	0.001333
GO:0050875_cellular_physiological_process	OPN3	7197	278	1.12142	-5.34703	15	0.02	0.001333
GO:0050875_cellular_physiological_process	RBM9	7197	278	1.12142	-5.34703	15	0.02	0.001333
GO:0050875_cellular_physiological_process	NME3	7197	278	1.12142	-5.34703	15	0.02	0.001333
GO:0050875_cellular_physiological_process	ACN9	7197	278	1.12142	-5.34703	15	0.02	0.001333
GO:0050875_cellular_physiological_process	C1S	7197	278	1.12142	-5.34703	15	0.02	0.001333
GO:0050875_cellular_physiological_process	DLEU1	7197	278	1.12142	-5.34703	15	0.02	0.001333
GO:0050875_cellular_physiological_process	MYC	7197	278	1.12142	-5.34703	15	0.02	0.001333
GO:0050875_cellular_physiological_process	TNFRSF10B	7197	278	1.12142	-5.34703	15	0.02	0.001333
GO:0050875_cellular_physiological_process	RXRG	7197	278	1.12142	-5.34703	15	0.02	0.001333
GO:0050875_cellular_physiological_process	ATP5I	7197	278	1.12142	-5.34703	15	0.02	0.001333
GO:0050875_cellular_physiological_process	LRP1B	7197	278	1.12142	-5.34703	15	0.02	0.001333
GO:0050875_cellular_physiological_process	MAPK8IP3	7197	278	1.12142	-5.34703	15	0.02	0.001333
GO:0050875_cellular_physiological_process	ALS2CR2	7197	278	1.12142	-5.34703	15	0.02	0.001333
GO:0050875_cellular_physiological_process	CDO1	7197	278	1.12142	-5.34703	15	0.02	0.001333
GO:0050875_cellular_physiological_process	LGI1	7197	278	1.12142	-5.34703	15	0.02	0.001333
GO:0050875_cellular_physiological_process	ZNF226	7197	278	1.12142	-5.34703	15	0.02	0.001333
GO:0050875_cellular_physiological_process	PTGES2	7197	278	1.12142	-5.34703	15	0.02	0.001333
GO:0050875_cellular_physiological_process	DPF2	7197	278	1.12142	-5.34703	15	0.02	0.001333
GO:0050875_cellular_physiological_process	ATP5G3	7197	278	1.12142	-5.34703	15	0.02	0.001333
GO:0050875_cellular_physiological_process	MRPS5	7197	278	1.12142	-5.34703	15	0.02	0.001333
GO:0050875_cellular_physiological_process	HNRPAB	7197	278	1.12142	-5.34703	15	0.02	0.001333
GO:0050875_cellular_physiological_process	TEGT	7197	278	1.12142	-5.34703	15	0.02	0.001333
GO:0050875_cellular_physiological_process	INPP1	7197	278	1.12142	-5.34703	15	0.02	0.001333
GO:0050875_cellular_physiological_process	SOCS2	7197	278	1.12142	-5.34703	15	0.02	0.001333
GO:0050875_cellular_physiological_process	ZNF264	7197	278	1.12142	-5.34703	15	0.02	0.001333
GO:0050875_cellular_physiological_process	HSD11B1	7197	278	1.12142	-5.34703	15	0.02	0.001333
GO:0050875_cellular_physiological_process	PRKAG1	7197	278	1.12142	-5.34703	15	0.02	0.001333
GO:0050875_cellular_physiological_process	RABEP1	7197	278	1.12142	-5.34703	15	0.02	0.001333
GO:0050875_cellular_physiological_process	MAFG	7197	278	1.12142	-5.34703	15	0.02	0.001333
GO:0050875_cellular_physiological_process	SIRT4	7197	278	1.12142	-5.34703	15	0.02	0.001333
GO:0050875_cellular_physiological_process	PMSCL2	7197	278	1.12142	-5.34703	15	0.02	0.001333
GO:0050875_cellular_physiological_process	GOT2	7197	278	1.12142	-5.34703	15	0.02	0.001333
GO:0050875_cellular_physiological_process	NME2	7197	278	1.12142	-5.34703	15	0.02	0.001333
GO:0050875_cellular_physiological_process	MRPL34	7197	278	1.12142	-5.34703	15	0.02	0.001333
GO:0050875_cellular_physiological_process	NUP62	7197	278	1.12142	-5.34703	15	0.02	0.001333
GO:0050875_cellular_physiological_process	IDH3A	7197	278	1.12142	-5.34703	15	0.02	0.001333
GO:0050875_cellular_physiological_process	MRPL35	7197	278	1.12142	-5.34703	15	0.02	0.001333
GO:0050875_cellular_physiological_process	HOXB2	7197	278	1.12142	-5.34703	15	0.02	0.001333
GO:0050875_cellular_physiological_process	PMP22	7197	278	1.12142	-5.34703	15	0.02	0.001333
GO:0050875_cellular_physiological_process	CHTF18	7197	278	1.12142	-5.34703	15	0.02	0.001333
GO:0050875_cellular_physiological_process	AGXT2L1	7197	278	1.12142	-5.34703	15	0.02	0.001333
GO:0050875_cellular_physiological_process	TUBA2	7197	278	1.12142	-5.34703	15	0.02	0.001333
GO:0050875_cellular_physiological_process	SLC7A6	7197	278	1.12142	-5.34703	15	0.02	0.001333
GO:0050875_cellular_physiological_process	MCM7	7197	278	1.12142	-5.34703	15	0.02	0.001333
GO:0050875_cellular_physiological_process	TAF6L	7197	278	1.12142	-5.34703	15	0.02	0.001333
GO:0050875_cellular_physiological_process	PTPLA	7197	278	1.12142	-5.34703	15	0.02	0.001333
GO:0050875_cellular_physiological_process	CRKL	7197	278	1.12142	-5.34703	15	0.02	0.001333
GO:0050875_cellular_physiological_process	FBXO22	7197	278	1.12142	-5.34703	15	0.02	0.001333
GO:0050875_cellular_physiological_process	FBXO21	7197	278	1.12142	-5.34703	15	0.02	0.001333
GO:0050875_cellular_physiological_process	DNM1L	7197	278	1.12142	-5.34703	15	0.02	0.001333
GO:0050875_cellular_physiological_process	LYPLA1	7197	278	1.12142	-5.34703	15	0.02	0.001333
GO:0050875_cellular_physiological_process	LSM10	7197	278	1.12142	-5.34703	15	0.02	0.001333
GO:0050875_cellular_physiological_process	COX10	7197	278	1.12142	-5.34703	15	0.02	0.001333
GO:0050875_cellular_physiological_process	APG-1	7197	278	1.12142	-5.34703	15	0.02	0.001333
GO:0050875_cellular_physiological_process	NDUFS3	7197	278	1.12142	-5.34703	15	0.02	0.001333
GO:0050875_cellular_physiological_process	AK2	7197	278	1.12142	-5.34703	15	0.02	0.001333
GO:0050875_cellular_physiological_process	MTMR4	7197	278	1.12142	-5.34703	15	0.02	0.001333
GO:0050875_cellular_physiological_process	TIMM8A	7197	278	1.12142	-5.34703	15	0.02	0.001333
GO:0050875_cellular_physiological_process	VEGFB	7197	278	1.12142	-5.34703	15	0.02	0.001333
GO:0050875_cellular_physiological_process	PCCA	7197	278	1.12142	-5.34703	15	0.02	0.001333
GO:0050875_cellular_physiological_process	ZNF415	7197	278	1.12142	-5.34703	15	0.02	0.001333
GO:0050875_cellular_physiological_process	PABPC4	7197	278	1.12142	-5.34703	15	0.02	0.001333
GO:0050875_cellular_physiological_process	ATP1B4	7197	278	1.12142	-5.34703	15	0.02	0.001333
GO:0050875_cellular_physiological_process	FOLR2	7197	278	1.12142	-5.34703	15	0.02	0.001333
GO:0050875_cellular_physiological_process	HNRPA2B1	7197	278	1.12142	-5.34703	15	0.02	0.001333
GO:0050875_cellular_physiological_process	CRADD	7197	278	1.12142	-5.34703	15	0.02	0.001333
GO:0050875_cellular_physiological_process	ENPP5	7197	278	1.12142	-5.34703	15	0.02	0.001333
GO:0050875_cellular_physiological_process	RAB18	7197	278	1.12142	-5.34703	15	0.02	0.001333
GO:0050875_cellular_physiological_process	SIAT8E	7197	278	1.12142	-5.34703	15	0.02	0.001333
GO:0050875_cellular_physiological_process	MOCS2	7197	278	1.12142	-5.34703	15	0.02	0.001333
GO:0050875_cellular_physiological_process	MARK1	7197	278	1.12142	-5.34703	15	0.02	0.001333
GO:0050875_cellular_physiological_process	SORD	7197	278	1.12142	-5.34703	15	0.02	0.001333
GO:0050875_cellular_physiological_process	CGBP	7197	278	1.12142	-5.34703	15	0.02	0.001333
GO:0050875_cellular_physiological_process	RNF144	7197	278	1.12142	-5.34703	15	0.02	0.001333
GO:0050875_cellular_physiological_process	FRDA	7197	278	1.12142	-5.34703	15	0.02	0.001333
GO:0050875_cellular_physiological_process	BCL2	7197	278	1.12142	-5.34703	15	0.02	0.001333
GO:0050875_cellular_physiological_process	SUCLG1	7197	278	1.12142	-5.34703	15	0.02	0.001333
GO:0050875_cellular_physiological_process	SF3B2	7197	278	1.12142	-5.34703	15	0.02	0.001333
GO:0050875_cellular_physiological_process	FTL	7197	278	1.12142	-5.34703	15	0.02	0.001333
GO:0050875_cellular_physiological_process	MAN2A1	7197	278	1.12142	-5.34703	15	0.02	0.001333
GO:0050875_cellular_physiological_process	F13A1	7197	278	1.12142	-5.34703	15	0.02	0.001333
GO:0050875_cellular_physiological_process	FOXC1	7197	278	1.12142	-5.34703	15	0.02	0.001333
GO:0050875_cellular_physiological_process	MAP3K5	7197	278	1.12142	-5.34703	15	0.02	0.001333
GO:0050875_cellular_physiological_process	CRIM1	7197	278	1.12142	-5.34703	15	0.02	0.001333
GO:0050875_cellular_physiological_process	KLF13	7197	278	1.12142	-5.34703	15	0.02	0.001333
GO:0050875_cellular_physiological_process	FABP3	7197	278	1.12142	-5.34703	15	0.02	0.001333
GO:0050875_cellular_physiological_process	XRCC2	7197	278	1.12142	-5.34703	15	0.02	0.001333
GO:0050875_cellular_physiological_process	PCTP	7197	278	1.12142	-5.34703	15	0.02	0.001333
GO:0050875_cellular_physiological_process	CDKN2B	7197	278	1.12142	-5.34703	15	0.02	0.001333
GO:0050875_cellular_physiological_process	FAAH	7197	278	1.12142	-5.34703	15	0.02	0.001333
GO:0050875_cellular_physiological_process	NKTR	7197	278	1.12142	-5.34703	15	0.02	0.001333
GO:0050875_cellular_physiological_process	DUSP19	7197	278	1.12142	-5.34703	15	0.02	0.001333
GO:0050875_cellular_physiological_process	SDHB	7197	278	1.12142	-5.34703	15	0.02	0.001333
GO:0050875_cellular_physiological_process	MGST2	7197	278	1.12142	-5.34703	15	0.02	0.001333
GO:0050875_cellular_physiological_process	BHLHB3	7197	278	1.12142	-5.34703	15	0.02	0.001333
GO:0050875_cellular_physiological_process	RPS6KC1	7197	278	1.12142	-5.34703	15	0.02	0.001333
GO:0050875_cellular_physiological_process	FKBP14	7197	278	1.12142	-5.34703	15	0.02	0.001333
GO:0050875_cellular_physiological_process	HPGD	7197	278	1.12142	-5.34703	15	0.02	0.001333
GO:0050875_cellular_physiological_process	ARHGEF6	7197	278	1.12142	-5.34703	15	0.02	0.001333
GO:0050875_cellular_physiological_process	SIN3A	7197	278	1.12142	-5.34703	15	0.02	0.001333
GO:0050875_cellular_physiological_process	FANCG	7197	278	1.12142	-5.34703	15	0.02	0.001333
GO:0050875_cellular_physiological_process	ADAMTS5	7197	278	1.12142	-5.34703	15	0.02	0.001333
GO:0050875_cellular_physiological_process	MIPEP	7197	278	1.12142	-5.34703	15	0.02	0.001333
GO:0050875_cellular_physiological_process	FOXO1A	7197	278	1.12142	-5.34703	15	0.02	0.001333
GO:0050875_cellular_physiological_process	CEBPB	7197	278	1.12142	-5.34703	15	0.02	0.001333
GO:0050875_cellular_physiological_process	CDKN2C	7197	278	1.12142	-5.34703	15	0.02	0.001333
GO:0050875_cellular_physiological_process	CACNG1	7197	278	1.12142	-5.34703	15	0.02	0.001333
GO:0050875_cellular_physiological_process	COL4A5	7197	278	1.12142	-5.34703	15	0.02	0.001333
GO:0050875_cellular_physiological_process	SOX15	7197	278	1.12142	-5.34703	15	0.02	0.001333
GO:0050875_cellular_physiological_process	PKM2	7197	278	1.12142	-5.34703	15	0.02	0.001333
GO:0050875_cellular_physiological_process	RFX1	7197	278	1.12142	-5.34703	15	0.02	0.001333
GO:0050875_cellular_physiological_process	NR1D1	7197	278	1.12142	-5.34703	15	0.02	0.001333
GO:0050875_cellular_physiological_process	TPI1	7197	278	1.12142	-5.34703	15	0.02	0.001333
GO:0050875_cellular_physiological_process	AP2B1	7197	278	1.12142	-5.34703	15	0.02	0.001333
GO:0050875_cellular_physiological_process	ASXL1	7197	278	1.12142	-5.34703	15	0.02	0.001333
GO:0050875_cellular_physiological_process	FDXR	7197	278	1.12142	-5.34703	15	0.02	0.001333
GO:0050875_cellular_physiological_process	CKMT2	7197	278	1.12142	-5.34703	15	0.02	0.001333
GO:0050875_cellular_physiological_process	PDCD8	7197	278	1.12142	-5.34703	15	0.02	0.001333
GO:0050875_cellular_physiological_process	APG12L	7197	278	1.12142	-5.34703	15	0.02	0.001333
GO:0050875_cellular_physiological_process	STX7	7197	278	1.12142	-5.34703	15	0.02	0.001333
GO:0050875_cellular_physiological_process	SDHC	7197	278	1.12142	-5.34703	15	0.02	0.001333
GO:0050875_cellular_physiological_process	CREB1	7197	278	1.12142	-5.34703	15	0.02	0.001333
GO:0050875_cellular_physiological_process	FOSL2	7197	278	1.12142	-5.34703	15	0.02	0.001333
GO:0050875_cellular_physiological_process	PTPN3	7197	278	1.12142	-5.34703	15	0.02	0.001333
