# Supplementary material for: Resistance Exercise Reverses Aging in Human Skeletal Muscle
Source: PLoS One. 2007 May 23;2(5):e465. doi: 10.1371/journal.pone.0000465 (PMC1866181; doi:10.1371/journal.pone.0000465)
Supplement: Table S5 — Exercise reverses gene expression in older adults to that of younger adults. 179 genes are shown relative to the average of young expression both before and after 6 months of exercise training. The readings are the average of the 14 adults listed in Supplemental Table 1, Post exercise. NB, Figure 3a is a diagram of this data. (0.12 MB XLS) [file pone.0000465.s005.xls]

## Sheet: Sheet1
DIFFERENTIAL EXPRESSION W.R.T EXERCISE						DIFFERENTIAL EXPRESSION W.R.T AGE
		Ratio of Expression for Post exercise/Pre exercise				Ratio of Expression for Old/Young
			Raw P-value	Adjusted P-values			Raw P-value	Adjusted P-values
				FWER (Holm's)	FDR (BH)			FWER (Holm's)	FDR (BH)
genes	Cluster									accession	symbol	type	definition	ontology	synonym
GI_16950596-A	11	1.31383	9.22e-09	5.49e-06	5.49e-06	0.747393	1.14e-08	0.0002752	1.69e-06	NM_053035.1	MRPS33	A	Homo sapiens mitochondrial ribosomal protein S33 (MRPS33), nuclear gene encoding mitochondrial protein, transcript variant 2, mRNA.	go_component: mitochondrion [goid 0005739] [evidence IEA]; go_component: mitochondrial small ribosomal subunit [goid 0005763] [evidence NAS] [pmid 11279123]; go_function: structural constituent of ribosome [goid 0003735] [evidence NAS] [pmid 11
GI_28372544-S	11	1.38512	4.05e-08	2.41e-05	1.21e-05	0.702552	2.65e-07	0.0063598	1.85e-05	NM_174925.1	LOC205251	S	Homo sapiens hypothetical protein LOC205251 (LOC205251), mRNA.
GI_7705703-S	11	1.35694	2.24e-07	0.0001328	3.58e-05	0.771508	1.68e-07	0.0040298	1.32e-05	NM_015917.1	LOC51064	S	Homo sapiens glutathione S-transferase subunit 13 homolog (LOC51064), mRNA.	go_component: mitochondrion [goid 0005739] [evidence IEA]; go_component: periplasmic space (sensu Gram-negative Bacteria) [goid 0030288] [evidence IEA]; go_function: glutathione transferase activity [goid 0004364] [evidence IEA]; go_function: t
GI_19913429-S	11	1.34938	2.4e-07	0.0001423	3.58e-05	0.795793	4.29e-08	0.0010358	4.57e-06	NM_001685.3	ATP5J	S	Homo sapiens ATP synthase, H+ transporting, mitochondrial F0 complex, subunit F6 (ATP5J), nuclear gene encoding mitochondrial protein, mRNA.	go_component: mitochondrial inner membrane [goid 0005743] [evidence TAS] [pmid 7698763]; go_component: membrane fraction [goid 0005624] [evidence NR]; go_component: mitochondrion [goid 0005739] [evidence TAS] [pmid 1825642]; go_function: adenos
GI_26665890-A	11	1.27051	1.3e-06	0.0007655	0.0001129	0.799936	7.31e-07	0.01747	3.99e-05	NM_172199.1	AK2	A	Homo sapiens adenylate kinase 2 (AK2), transcript variant AK2C, mRNA.	go_component: mitochondrion [goid 0005739] [evidence IEA]; go_function: adenylate kinase activity [goid 0004017] [evidence TAS] [pmid 9504408]; go_function: ATP binding [goid 0005524] [evidence IEA]; go_function: kinase activity [goid 0016301]
GI_5453558-S	11	1.24852	1.42e-06	0.0008357	0.0001129	0.772828	1.08e-10	2.63e-06	7.97e-08	NM_006356.1	ATP5H	S	Homo sapiens ATP synthase, H+ transporting, mitochondrial F0 complex, subunit d (ATP5H), mRNA.	go_component: mitochondrion [goid 0005739] [evidence IEA]; go_function: hydrogen ion transporter activity [goid 0015078] [evidence IEA]; go_function: hydrogen-transporting two-sector ATPase activity [goid 0003936] [evidence IEA]; go_process: pr
GI_4502300-S	11	1.26398	1.74e-06	0.0010242	0.0001153	0.713812	1.35e-10	3.28e-06	9.14e-08	NM_001689.1	ATP5G3	S	Homo sapiens ATP synthase, H+ transporting, mitochondrial F0 complex, subunit c (subunit 9) isoform 3 (ATP5G3), mRNA.	go_component: proton-transporting ATP synthase complex (sensu Eukarya) [goid 0005753] [evidence TAS] [pmid 7698763]; go_component: mitochondrion [goid 0005739] [evidence IEA]; go_component: integral to membrane [goid 0016021] [evidence IEA]; go
GI_20127622-S	11	1.22669	2.37e-06	0.0013865	0.0001282	0.807304	5.22e-07	0.0125017	3.12e-05	NM_024102.2	MEP50	S	Homo sapiens MEP50 protein (MEP50), mRNA.
GI_4758787-S	11	1.15226	1.2e-05	0.0069345	0.0003417	0.751642	9.8e-08	0.0023606	8.81e-06	NM_004551.1	NDUFS3	S	Homo sapiens NADH dehydrogenase (ubiquinone) Fe-S protein 3, 30kDa (NADH-coenzyme Q reductase) (NDUFS3), mRNA.	go_component: NADH dehydrogenase complex (ubiquinone) (sensu Eukarya) [goid 0005748] [evidence TAS] [pmid 9647766]; go_component: mitochondrion [goid 0005739] [evidence IEA]; go_component: membrane fraction [goid 0005624] [evidence NR]; go_comp
GI_28372554-S	11	1.17728	1.45e-05	0.0083225	0.0003921	0.691685	1.14e-06	0.0272942	5.48e-05	NM_174934.1	SCN4B	S	Homo sapiens sodium channel, voltage-gated, type IV, beta (SCN4B), mRNA.
GI_4758939-S	11	1.24019	1.99e-05	0.0113282	0.0004118	0.737991	1.21e-08	0.0002936	1.75e-06	NM_004894.1	C14orf2	S	Homo sapiens chromosome 14 open reading frame 2 (C14orf2), mRNA.	go_component: mitochondrion [goid 0005739] [evidence IEA]
GI_40549423-S	11	1.16929	2e-05	0.0113805	0.0004118	0.764713	5.38e-07	0.0128839	3.2e-05	NM_018473.2	THEM2	S	Homo sapiens thioesterase superfamily member 2 (THEM2), mRNA.	go_function: catalytic activity [goid 0003824] [evidence IEA]; go_function: hydrolase activity [goid 0016787] [evidence IEA]
GI_27498545-S	11	1.27703	2.36e-05	0.0133819	0.0004689	0.710392	4.96e-10	1.2e-05	1.86e-07	XM_166346.2	LOC154467	S	Homo sapiens hypothetical protein BC003515 (LOC154467), mRNA.
GI_4502854-S	11	1.21561	2.67e-05	0.0150685	0.0004967	0.66657	5.04e-10	1.22e-05	1.86e-07	NM_001825.1	CKMT2	S	Homo sapiens creatine kinase, mitochondrial 2 (sarcomeric) (CKMT2), nuclear gene encoding mitochondrial protein, mRNA.	go_component: mitochondrion [goid 0005739] [evidence TAS] [pmid 2324105]; go_function: creatine kinase activity [goid 0004111] [evidence TAS] [pmid 2324105]; go_function: transferase activity, transferring phosphorus-containing groups [goid 001
GI_35249735-I	11	1.16873	4.58e-05	0.0256482	0.0007378	1.20917	1.69e-06	0.0402889	7.27e-05	NM_015919.2	ZNF226	I	Homo sapiens zinc finger protein 226 (ZNF226), mRNA.
GI_6005716-S	11	1.30873	5.41e-05	0.0302211	0.0008371	0.73557	2.51e-07	0.0060339	1.78e-05	NM_007100.1	ATP5I	S	Homo sapiens ATP synthase, H+ transporting, mitochondrial F0 complex, subunit e (ATP5I), mRNA.	go_component: mitochondrion [goid 0005739] [evidence IEA]; go_function: hydrogen ion transporter activity [goid 0015078] [evidence IEA]; go_function: hydrogen-transporting two-sector ATPase activity [goid 0003936] [evidence IEA]; go_process: pr
GI_22547132-S	11	1.21001	6.55e-05	0.0364875	0.0009761	0.713975	3.4e-07	0.0081466	2.23e-05	NM_023937.2	MRPL34	S	Homo sapiens mitochondrial ribosomal protein L34 (MRPL34), nuclear gene encoding mitochondrial protein, mRNA.	go_component: ribosome [goid 0005840] [evidence IEA]; go_component: intracellular [goid 0005622] [evidence IEA]; go_component: mitochondrion [goid 0005739] [evidence IEA]; go_function: structural constituent of ribosome [goid 0003735] [evidence
GI_34147649-S	11	1.23503	0.0001004	0.0556385	0.0013535	0.704811	2.4e-10	5.83e-06	1.03e-07	NM_003562.3	SLC25A11	S	Homo sapiens solute carrier family 25 (mitochondrial carrier; oxoglutarate carrier), member 11 (SLC25A11), mRNA.	go_component: mitochondrial inner membrane [goid 0005743] [evidence TAS] [pmid 1457818]; go_component: mitochondrion [goid 0005739] [evidence IEA]; go_component: integral to plasma membrane [goid 0005887] [evidence TAS] [pmid 1457818]; go_funct
GI_38327624-A	11	1.30872	0.0001022	0.0564115	0.0013535	0.784344	6.27e-07	0.0149924	3.57e-05	NM_004077.2	CS	A	Homo sapiens citrate synthase (CS), nuclear gene encoding mitochondrial protein, transcript variant 1, mRNA.	go_component: mitochondrion [goid 0005739] [evidence TAS] [pmid 9543345]; go_function: citrate (Si)-synthase activity [goid 0004108] [evidence TAS] [pmid 9543345]; go_function: lyase activity [goid 0016829] [evidence IEA]; go_function: transfer
GI_29029592-S	11	1.07609	0.0001177	0.064762	0.0014932	0.876539	1.15e-06	0.0273712	5.48e-05	NM_017629.2	EIF2C4	S	Homo sapiens eukaryotic translation initiation factor 2C, 4 (EIF2C4), mRNA.	go_function: translation initiation factor activity [goid 0003743] [evidence IEA]; go_process: protein biosynthesis [goid 0006412] [evidence IEA]
GI_44680151-S	11	1.15745	0.0001736	0.0949606	0.0020693	1.24891	6.87e-09	0.0001663	1.17e-06	NM_005253.3	FOSL2	S	Homo sapiens FOS-like antigen 2 (FOSL2), mRNA.	go_component: nucleus [goid 0005634] [evidence TAS] [pmid 8954781]; go_function: transcription factor activity [goid 0003700] [evidence TAS] [pmid 8954781]; go_process: cell death [goid 0008219] [evidence TAS] [pmid 8954781]; go_process: regula
GI_21389406-S	11	1.26182	0.0002037	0.111036	0.0023351	0.659701	6.05e-10	1.47e-05	2.17e-07	NM_144608.1	FLJ32384	S	Homo sapiens hypothetical protein MGC39389 (FLJ32384), mRNA.
GI_8923416-S	11	1.17311	0.0002877	0.155059	0.0029403	1.21402	9.16e-07	0.0218674	4.64e-05	NM_017825.1	ADPRHL2	S	Homo sapiens ADP-ribosylhydrolase like 2 (ADPRHL2), mRNA.	go_function: hydrolase activity [goid 0016787] [evidence IEA]
GI_20149519-S	11	1.23571	0.0002911	0.156597	0.0029403	1.3376	2.05e-06	0.0486092	8.4e-05	NM_002573.2	PAFAH1B3	S	Homo sapiens platelet-activating factor acetylhydrolase, isoform Ib, gamma subunit 29kDa (PAFAH1B3), mRNA.	go_component: soluble fraction [goid 0005625] [evidence NR]; go_component: cytoplasm [goid 0005737] [evidence NR]; go_function: 1-alkyl-2-acetylglycerophosphocholine esterase activity [goid 0003847] [evidence IEA]; go_function: hydrolase activi
GI_13994241-S	11	1.22698	0.000329	0.176031	0.0031493	0.636561	1.06e-07	0.0025626	9.29e-06	NM_031892.1	SH3KBP1	S	Homo sapiens SH3-domain kinase binding protein 1 (SH3KBP1), mRNA.	go_component: kinesin complex [goid 0005871] [evidence IEA]; go_component: membrane [goid 0016020] [evidence IEA]; go_component: nucleus [goid 0005634] [evidence IEA]
GI_40354191-S	11	1.16039	0.0003715	0.197987	0.0034592	0.802739	1.39e-06	0.0330874	6.25e-05	NM_000421.2	KRT10	S	Homo sapiens keratin 10 (epidermolytic hyperkeratosis; keratosis palmaris et plantaris) (KRT10), mRNA.	go_component: intermediate filament [goid 0005882] [evidence TAS] [pmid 1380725]; go_component: kinesin complex [goid 0005871] [evidence IEA]; go_function: structural molecule activity [goid 0005198] [evidence TAS] [pmid 1380725]; go_process: e
GI_21687152-S	11	1.1219	0.0004332	0.229155	0.0037967	1.29687	5.13e-08	0.001236	5.22e-06	NM_145306.1	C10orf35	S	Homo sapiens chromosome 10 open reading frame 35 (C10orf35), mRNA.
GI_21265092-S	11	1.25507	0.0004517	0.238472	0.0038533	0.688168	1.21e-07	0.002906	1.01e-05	NM_032477.1	MRPL41	S	Homo sapiens mitochondrial ribosomal protein L41 (MRPL41), nuclear gene encoding mitochondrial protein, mRNA.	go_function: structural constituent of ribosome [goid 0003735] [evidence IEA]
GI_31541784-S	11	1.11231	0.0005323	0.27893	0.0043374	0.838014	1.03e-06	0.0245695	5.07e-05	NM_005759.3	ABI2	S	Homo sapiens abl interactor 2 (ABI2), mRNA.	go_component: cytoplasm [goid 0005737] [evidence TAS] [pmid 8649853]; go_function: SH3/SH2 adaptor protein activity [goid 0005070] [evidence TAS] [pmid 7590236]; go_function: tumor suppressor [goid 0008181] [evidence P] [pmid 7590236]; go_funct
GI_21918871-S	11	1.12688	0.0005385	0.281656	0.0043374	0.800633	1.73e-07	0.0041648	1.36e-05	NM_145315.2	LACE1	S	Homo sapiens lactation elevated 1 (LACE1), mRNA.
GI_45505146-S	11	1.11747	0.0006606	0.342833	0.0050474	0.81503	1.25e-06	0.0298617	5.81e-05	NM_022344.2	NJMU-R1	S	Homo sapiens protein kinase Njmu-R1 (NJMU-R1), mRNA.	go_component: cellular_component unknown [goid 0008372] [evidence ND]; go_function: molecular_function unknown [goid 0005554] [evidence ND]; go_process: spermatogenesis [goid 0007283] [evidence NAS]
GI_45387954-S	11	1.24296	0.0007896	0.407435	0.0057844	0.73848	2.36e-09	5.72e-05	5.85e-07	NM_205767.1	QIL1	S	Homo sapiens QIL1 protein (QIL1), mRNA.
GI_22325371-I	11	1.16495	0.0012382	0.627773	0.0081997	0.773738	8.19e-07	0.0195609	4.33e-05	NM_148179.1	C9orf23	I	Homo sapiens chromosome 9 open reading frame 23 (C9orf23), transcript variant 2, mRNA.
GI_22035639-S	11	1.21659	0.0012931	0.654327	0.0084693	0.818572	1.38e-06	0.0328482	6.24e-05	NM_002413.3	MGST2	S	Homo sapiens microsomal glutathione S-transferase 2 (MGST2), mRNA.	go_component: microsome [goid 0005792] [evidence TAS] [pmid 8703034]; go_component: integral to membrane [goid 0016021] [evidence IEA]; go_component: membrane fraction [goid 0005624] [evidence TAS] [pmid 8703034]; go_function: glutathione trans
GI_32698875-S	11	1.1263	0.0023689	1	0.0135594	0.796469	3.07e-09	7.44e-05	6.63e-07	NM_182523.1	MGC61571	S	Homo sapiens hypothetical protein MGC61571 (MGC61571), mRNA.
GI_32469514-S	11	1.23429	0.0029869	1	0.0158946	0.618318	1.42e-10	3.46e-06	9.22e-08	NM_181843.1	NUDT8	S	Homo sapiens nudix (nucleoside diphosphate linked moiety X)-type motif 8 (NUDT8), mRNA.
GI_31543665-S	11	1.11663	0.003124	1	0.0163324	1.18527	6.97e-08	0.0016796	6.76e-06	NM_003164.2	STX5A	S	Homo sapiens syntaxin 5A (STX5A), mRNA.	go_process: nonselective vesicle targeting [goid 0006903] [evidence P] [pmid 9188044]
GI_6912661-S	11	1.17651	0.0036489	1	0.0185874	0.741518	1.34e-08	0.0003246	1.86e-06	NM_012240.1	SIRT4	S	Homo sapiens sirtuin (silent mating type information regulation 2 homolog) 4 (S. cerevisiae) (SIRT4), mRNA.	go_component: chromatin silencing complex [goid 0005677] [evidence IEA]; go_function: NAD ADP-ribosyltransferase activity [goid 0003950] [evidence TAS] [pmid 10381378]; go_function: DNA binding [goid 0003677] [evidence IEA]; go_function: hydrol
GI_40789232-S	11	1.14166	0.0038894	1	0.0194279	0.773544	3.9e-07	0.0093399	2.45e-05	NM_020312.1	DKFZP434K046	S	Homo sapiens hypothetical protein DKFZp434K046 (DKFZP434K046), mRNA.
GI_21361386-S	11	1.10692	0.0039386	1	0.0194279	0.651005	2.91e-08	0.000702	3.42e-06	NM_006917.2	RXRG	S	Homo sapiens retinoid X receptor, gamma (RXRG), mRNA.	go_component: nucleus [goid 0005634] [evidence IEA]; go_function: retinoid-X receptor activity [goid 0004886] [evidence TAS] [pmid 8034312]; go_function: steroid hormone receptor activity [goid 0003707] [evidence IEA]; go_function: steroid bind
GI_37542476-S	11	1.19786	0.0039992	1	0.019537	1.81784	1.78e-06	0.0422615	7.55e-05	XM_353148.1	LOC374821	S	Homo sapiens LOC374821 (LOC374821), mRNA.
GI_22035593-A	11	1.14343	0.0045243	1	0.0210664	0.709697	6.85e-09	0.0001657	1.17e-06	NM_145644.1	MRPL35	A	Homo sapiens mitochondrial ribosomal protein L35 (MRPL35), nuclear gene encoding mitochondrial protein, transcript variant 2, mRNA.
GI_18426910-S	11	1.15985	0.0057754	1	0.0253099	1.35704	1.2e-06	0.0285775	5.69e-05	NM_080792.1	PTPNS1	S	Homo sapiens protein tyrosine phosphatase, non-receptor type substrate 1 (PTPNS1), mRNA.	go_component: plasma membrane [goid 0005886] [evidence TAS] [pmid 9070220]; go_component: membrane [goid 0016020] [evidence P]; go_component: integral to membrane [goid 0016021] [evidence IEA]; go_function: receptor activity [goid 0004872] [evi
GI_24371247-S	11	1.08946	0.0064295	1	0.0273712	0.814251	1.25e-06	0.029747	5.81e-05	NM_023934.2	HCBP6	S	Homo sapiens hepatitis C virus core-binding protein 6 (HCBP6), mRNA.
GI_4758897-I	11	1.1063	0.0069916	1	0.0282891	1.23528	6.46e-07	0.0154579	3.66e-05	NM_004813.1	PEX16	I	Homo sapiens peroxisomal biogenesis factor 16 (PEX16), transcript variant 1, mRNA.	go_component: integral to peroxisomal membrane [goid 0005779] [evidence NR]; go_component: peroxisome [goid 0005777] [evidence E]; go_process: peroxisome organization and biogenesis [goid 0007031] [evidence E]
GI_42476215-S	11	1.1095	0.0078405	1	0.0301482	0.767597	1.7e-09	4.11e-05	4.69e-07	NM_138787.2	LOC119710	S	Homo sapiens hypothetical protein BC009561 (LOC119710), mRNA.
GI_38348359-S	11	1.16366	0.0082123	1	0.0311754	0.727856	7.02e-08	0.0016928	6.76e-06	NM_198527.1	MGC45386	S	Homo sapiens Similar to RIKEN cDNA 1110033O09 gene (MGC45386), mRNA.	go_function: catalytic activity [goid 0003824] [evidence IEA]
GI_10938020-S	11	1.26686	0.0085369	1	0.0319998	0.634338	8.4e-09	0.0002033	1.35e-06	NM_004102.2	FABP3	S	Homo sapiens fatty acid binding protein 3, muscle and heart (mammary-derived growth inhibitor) (FABP3), mRNA.	go_component: soluble fraction [goid 0005625] [evidence NR]; go_component: cytoplasm [goid 0005737] [evidence NR]; go_function: lipid binding [goid 0008289] [evidence P]; go_function: fatty acid binding [goid 0005504] [evidence NR]; go_function
GI_9507164-S	11	1.06671	0.0110206	1	0.0390968	1.11915	1.21e-07	0.0029142	1.01e-05	NM_018968.1	SNTG2	S	Homo sapiens syntrophin, gamma 2 (SNTG2), mRNA.	go_component: peripheral plasma membrane protein [goid 0000157] [evidence P] [pmid 10747910]; go_component: syntrophin complex [goid 0016013] [evidence TAS] [pmid 10747910]; go_component: membrane [goid 0016020] [evidence IEA]; go_component: cy
GI_31543666-S	11	1.07875	0.0113077	1	0.0397415	0.827988	2.32e-07	0.0055764	1.68e-05	NM_003171.2	SUPV3L1	S	Homo sapiens suppressor of var1, 3-like 1 (S. cerevisiae) (SUPV3L1), mRNA.	go_component: mitochondrion [goid 0005739] [evidence TAS] [pmid 9925937]; go_function: helicase activity [goid 0004386] [evidence P] [pmid 9925937]; go_function: adenosinetriphosphatase activity [goid 0004002] [evidence P] [pmid 9925937]; go_fu
GI_20336200-I	11	1.09274	0.0121649	1	0.041909	1.1616	4.62e-08	0.0011142	4.83e-06	NM_138293.1	ATM	I	Homo sapiens ataxia telangiectasia mutated (includes complementation groups A, C and D) (ATM), transcript variant 3, mRNA.	go_component: nucleus [goid 0005634] [evidence IEA]; go_function: protein serine/threonine kinase activity [goid 0004674] [evidence TAS]; go_function: protein kinase activity [goid 0004672] [evidence E]; go_function: cAMP-dependent protein kina
GI_5174566-S	12	1.14709	9.3e-07	0.0005505	0.0001108	0.760103	5.53e-08	0.0013343	5.52e-06	NM_005932.1	MIPEP	S	Homo sapiens mitochondrial intermediate peptidase (MIPEP), nuclear gene encoding mitochondrial protein, mRNA.	go_component: mitochondrion [goid 0005739] [evidence TAS] [pmid 9073519]; go_function: metalloendopeptidase activity [goid 0004222] [evidence IEA] [pmid 9073519]; go_function: zinc ion binding [goid 0008270] [evidence IEA]; go_function: magnesi
GI_38788352-S	12	1.26843	1.52e-06	0.0008927	0.0001129	0.872058	1.52e-06	0.0362403	6.69e-05	NM_006402.2	HBXIP	S	Homo sapiens hepatitis B virus x interacting protein (HBXIP), mRNA.	go_function: antiviral response protein activity [goid 0003800] [evidence TAS] [pmid 9499022]; go_process: viral replication [goid 0008166] [evidence TAS] [pmid 9499022]; go_process: invasive growth [goid 0007125] [evidence TAS] [pmid 9499022];
GI_4826853-S	12	1.34174	2.08e-06	0.0012238	0.0001243	0.758007	6.96e-10	1.69e-05	2.32e-07	NM_005004.1	NDUFB8	S	Homo sapiens NADH dehydrogenase (ubiquinone) 1 beta subcomplex, 8, 19kDa (NDUFB8), mRNA.	go_component: NADH dehydrogenase complex (ubiquinone) (sensu Eukarya) [goid 0005748] [evidence TAS] [pmid 9878551]; go_component: mitochondrion [goid 0005739] [evidence IEA]; go_component: membrane fraction [goid 0005624] [evidence NR]; go_func
GI_7705623-S	12	1.23064	4.36e-06	0.0025441	0.0001997	0.765499	5.13e-12	1.25e-07	1.39e-08	NM_016063.1	C6orf74	S	Homo sapiens chromosome 6 open reading frame 74 (C6orf74), mRNA.
GI_4758773-S	12	1.2865	5.42e-06	0.0031561	0.0002155	0.780081	8.76e-09	0.0002121	1.4e-06	NM_004548.1	NDUFB10	S	Homo sapiens NADH dehydrogenase (ubiquinone) 1 beta subcomplex, 10, 22kDa (NDUFB10), mRNA.	go_component: NADH dehydrogenase complex (ubiquinone) (sensu Eukarya) [goid 0005748] [evidence P] [pmid 9878551]; go_component: membrane fraction [goid 0005624] [evidence NR]; go_function: NADH dehydrogenase (ubiquinone) activity [goid 0008137]
GI_4885080-S	12	1.31005	8.99e-06	0.0052157	0.000292	0.777349	1.51e-06	0.0359407	6.66e-05	NM_005175.1	ATP5G1	S	Homo sapiens ATP synthase, H+ transporting, mitochondrial F0 complex, subunit c (subunit 9), isoform 1 (ATP5G1), mRNA.	go_component: proton-transporting ATP synthase complex (sensu Eukarya) [goid 0005753] [evidence TAS] [pmid 8328972]; go_component: mitochondrion [goid 0005739] [evidence IEA]; go_component: integral to membrane [goid 0016021] [evidence IEA]; go
GI_31341729-S	12	1.23378	9.23e-06	0.0053451	0.000292	0.784157	3.11e-09	7.54e-05	6.64e-07	NM_178547.2	ARCH	S	Homo sapiens archease (ARCH), mRNA.
GI_34147363-S	12	1.20076	1.83e-05	0.0104597	0.0004118	0.653435	1.79e-11	4.37e-07	3.12e-08	NM_024122.2	MGC4825	S	Homo sapiens hypothetical protein MGC4825 (MGC4825), mRNA.
GI_24475985-S	12	1.352	3.87e-05	0.021764	0.0006776	0.541377	3.15e-09	7.64e-05	6.68e-07	NM_016498.2	HSPC242	S	Homo sapiens hypothetical protein HSPC242 (HSPC242), mRNA.
GI_34328934-S	12	1.30151	4.5e-05	0.0252322	0.0007378	0.807876	3.12e-08	0.0007535	3.57e-06	NM_014078.4	MRPL13	S	Homo sapiens mitochondrial ribosomal protein L13 (MRPL13), nuclear gene encoding mitochondrial protein, mRNA.	go_component: ribosome [goid 0005840] [evidence IEA]; go_component: intracellular [goid 0005622] [evidence IEA]; go_component: mitochondrion [goid 0005739] [evidence IEA]; go_component: mitochondrial large ribosomal subunit [goid 0005762] [evid
GI_34147623-S	12	1.17424	0.0001005	0.0556385	0.0013535	0.734371	7.12e-09	0.0001723	1.2e-06	NM_003104.3	SORD	S	Homo sapiens sorbitol dehydrogenase (SORD), mRNA.	go_function: alcohol dehydrogenase activity, zinc-dependent [goid 0004024] [evidence IEA]; go_function: zinc ion binding [goid 0008270] [evidence IEA]; go_function: L-iditol 2-dehydrogenase activity [goid 0003939] [evidence IEA]; go_function: o
GI_4503300-S	12	1.14201	0.0001579	0.0867052	0.001961	0.711094	4.3e-10	1.04e-05	1.72e-07	NM_001359.1	DECR1	S	Homo sapiens 2,4-dienoyl CoA reductase 1, mitochondrial (DECR1), nuclear gene encoding mitochondrial protein, mRNA.	go_component: mitochondrion [goid 0005739] [evidence TAS] [pmid 7818482]; go_function: 2,4-dienoyl-CoA reductase (NADPH) activity [goid 0008670] [evidence TAS] [pmid 7818482]; go_function: oxidoreductase activity [goid 0016491] [evidence IEA];
GI_23308744-S	12	1.14518	0.0001627	0.0891529	0.0019788	0.813694	3.77e-08	0.000909	4.17e-06	NM_152503.1	C20orf132	S	Homo sapiens chromosome 20 open reading frame 132 (C20orf132), mRNA.
GI_7662501-S	12	1.19795	0.0002465	0.133618	0.0026715	0.764707	4.87e-09	0.0001179	9.12e-07	NM_014060.1	MCTS1	S	Homo sapiens malignant T cell amplified sequence 1 (MCTS1), mRNA.	go_function: RNA binding [goid 0003723] [evidence IEA]; go_process: positive regulation of cell proliferation [goid 0008284] [evidence TAS] [pmid 9766643]; go_process: oncogenesis [goid 0007048] [evidence TAS] [pmid 9766643]; go_process: regula
GI_31542761-S	12	1.18528	0.0004182	0.222064	0.0037765	0.666608	5.63e-09	0.0001365	1.03e-06	NM_144576.2	FLJ32452	S	Homo sapiens hypothetical protein FLJ32452 (FLJ32452), mRNA.
GI_42476040-S	12	1.20356	0.000459	0.24145	0.0038533	0.707912	6.75e-11	1.64e-06	5.87e-08	NM_020188.2	DC13	S	Homo sapiens DC13 protein (DC13), mRNA.
GI_25777729-S	12	1.16672	0.0006366	0.331051	0.0049277	0.728881	4.85e-09	0.0001175	9.12e-07	NM_000692.3	ALDH1B1	S	Homo sapiens aldehyde dehydrogenase 1 family, member B1 (ALDH1B1), nuclear gene encoding mitochondrial protein, mRNA.	go_component: mitochondrion [goid 0005739] [evidence IEA]; go_function: aldehyde dehydrogenase activity [goid 0004028] [evidence NR]; go_function: aldehyde dehydrogenase (NAD) activity [goid 0004029] [evidence IEA]; go_function: oxidoreductase
GI_26665889-I	12	1.19308	0.0006965	0.36081	0.0052549	0.8239	2.02e-06	0.0480982	8.34e-05	NM_001625.2	AK2	I	Homo sapiens adenylate kinase 2 (AK2), transcript variant AK2A, mRNA.	go_component: mitochondrion [goid 0005739] [evidence IEA]; go_function: adenylate kinase activity [goid 0004017] [evidence TAS] [pmid 9504408]; go_function: ATP binding [goid 0005524] [evidence IEA]; go_function: kinase activity [goid 0016301]
GI_22547118-A	12	1.11743	0.0007958	0.409857	0.0057844	1.39788	1.06e-09	2.56e-05	3.22e-07	NM_147187.1	TNFRSF10B	A	Homo sapiens tumor necrosis factor receptor superfamily, member 10b (TNFRSF10B), transcript variant 2, mRNA.	go_component: integral to membrane [goid 0016021] [evidence IC] [pmid 9311998]; go_component: integral to plasma membrane [goid 0005887] [evidence E] [pmid 9311998]; go_function: death receptor activity [goid 0005035] [evidence E] [pmid 9311998
GI_14150093-S	12	1.16274	0.0009983	0.511146	0.0070001	0.70781	1.64e-07	0.0039336	1.29e-05	NM_032321.1	MGC13057	S	Homo sapiens hypothetical protein MGC13057 (MGC13057), mRNA.
GI_4505684-S	12	1.15046	0.0010733	0.547381	0.0073527	0.794781	1.86e-09	4.52e-05	4.93e-07	NM_000284.1	PDHA1	S	Homo sapiens pyruvate dehydrogenase (lipoamide) alpha 1 (PDHA1), mRNA.	go_component: mitochondrion [goid 0005739] [evidence TAS] [pmid 3034892]; go_function: pyruvate dehydrogenase (lipoamide) activity [goid 0004739] [evidence IEA]; go_function: oxidoreductase activity [goid 0016491] [evidence IEA]; go_process: ac
GI_9257241-S	12	1.21331	0.0016793	0.844663	0.0106472	0.725645	6.09e-09	0.0001474	1.07e-06	NM_003000.1	SDHB	S	Homo sapiens succinate dehydrogenase complex, subunit B, iron sulfur (Ip) (SDHB), mRNA.	go_component: mitochondrion [goid 0005739] [evidence TAS] [pmid 2302193]; go_function: electron transporter activity [goid 0005489] [evidence IEA]; go_function: succinate dehydrogenase (ubiquinone) activity [goid 0008177] [evidence IEA]; go_fun
GI_31543907-S	12	1.12576	0.0017833	0.895199	0.0111876	0.829895	3.69e-07	0.0088521	2.37e-05	NM_014517.2	UBP1	S	Homo sapiens upstream binding protein 1 (LBP-1a) (UBP1), mRNA.	go_function: transcription co-repressor activity [goid 0003714] [evidence TAS] [pmid 8114710]; go_function: DNA binding [goid 0003677] [evidence E] [pmid 8114710]; go_function: transcription factor activity [goid 0003700] [evidence TAS] [pmid 8
GI_37546946-S	12	1.31893	0.0018926	0.948176	0.0117096	0.564341	2.03e-10	4.93e-06	1.02e-07	XM_351442.1	LOC375211	S	Homo sapiens similar to BolA domain-containing protein like (11.4 kD) (1P25) (LOC375211), mRNA.
GI_34147407-S	12	1.13039	0.0020441	1	0.012183	0.745726	2e-06	0.0476248	8.3e-05	NM_032273.2	DKFZp586C1924	S	Homo sapiens hypothetical protein DKFZp586C1924 (DKFZp586C1924), mRNA.
GI_16579882-S	12	1.20347	0.00235	1	0.0135594	0.749691	4.29e-08	0.0010349	4.57e-06	NM_014018.2	MRPS28	S	Homo sapiens mitochondrial ribosomal protein S28 (MRPS28), nuclear gene encoding mitochondrial protein, mRNA.	go_component: mitochondrion [goid 0005739] [evidence IEA]; go_component: mitochondrial small ribosomal subunit [goid 0005763] [evidence TAS] [pmid 10938081]; go_function: structural constituent of ribosome [goid 0003735] [evidence IEA]; go_func
GI_16554612-S	12	1.24023	0.002882	1	0.0156149	0.732725	4.1e-08	0.0009902	4.46e-06	NM_016065.2	MRPS16	S	Homo sapiens mitochondrial ribosomal protein S16 (MRPS16), nuclear gene encoding mitochondrial protein, mRNA.	go_component: ribosome [goid 0005840] [evidence IEA]; go_component: intracellular [goid 0005622] [evidence IEA]; go_component: mitochondrion [goid 0005739] [evidence IEA]; go_component: mitochondrial small ribosomal subunit [goid 0005763] [evid
GI_37546978-S	12	1.23767	0.0032323	1	0.0167517	0.701575	5.17e-07	0.0123778	3.11e-05	XM_352441.1	LOC376872	S	Homo sapiens similar to Ubiquinol-cytochrome C reductase complex 11 kDa protein, mitochondrial precursor (Mitochondrial hinge protein) (Cytochrome C1, nonheme 11 kDa protein) (Complex III subunit VIII) (LOC376872), mRNA.
GI_38348323-S	12	1.21819	0.0045142	1	0.0210664	0.566846	1.53e-08	0.0003702	2.06e-06	NM_198504.1	PAQR9	S	Homo sapiens progestin and adipoQ receptor family member IX (PAQR9), mRNA.
GI_6912437-S	12	1.12392	0.0062446	1	0.0267754	0.715515	2.14e-10	5.19e-06	1.02e-07	NM_012278.1	ITGB1BP2	S	Homo sapiens integrin beta 1 binding protein (melusin) 2 (ITGB1BP2), mRNA.	go_component: peripheral plasma membrane protein [goid 0000157] [evidence P] [pmid 10506186]; go_function: protein binding [goid 0005515] [evidence TAS] [pmid 10506186]; go_process: muscle development [goid 0007517] [evidence TAS] [pmid 1050618
GI_11038661-S	12	1.33533	0.0067102	1	0.0281638	1.81737	5.05e-07	0.012088	3.05e-05	NM_000491.2	C1QB	S	Homo sapiens complement component 1, q subcomponent, beta polypeptide (C1QB), mRNA.	go_component: complement component C1q complex [goid 0005602] [evidence TAS] [pmid 1706597]; go_component: microfibril [goid 0001527] [evidence IEA]; go_function: complement activity [goid 0003811] [evidence TAS] [pmid 1706597]; go_process: com
GI_34222094-S	12	1.0973	0.0069519	1	0.0282891	0.743721	6.49e-07	0.015526	3.67e-05	NM_012212.2	LTB4DH	S	Homo sapiens leukotriene B4 12-hydroxydehydrogenase (LTB4DH), mRNA.	go_component: cytoplasm [goid 0005737] [evidence NAS]; go_function: catalytic activity [goid 0003824] [evidence E] [pmid 8576264]; go_function: alcohol dehydrogenase activity, zinc-dependent [goid 0004024] [evidence IEA]; go_function: zinc ion
GI_21396492-A	12	1.085	0.0073254	1	0.0291063	1.19921	1.93e-06	0.045935	8.11e-05	NM_001587.3	OCRL	A	Homo sapiens oculocerebrorenal syndrome of Lowe (OCRL), transcript variant b, mRNA.	go_component: Golgi vesicle [goid 0005798] [evidence TAS] [pmid 1840503]; go_component: Golgi stack [goid 0005795] [evidence TAS] [pmid 1840503]; go_component: Golgi membrane [goid 0000139] [evidence NR]; go_function: phosphoinositide 5-phospha
GI_34147508-S	12	1.23473	0.0076965	1	0.0299811	0.591891	3.52e-10	8.56e-06	1.45e-07	NM_030929.3	FKSG28	S	Homo sapiens hypothetical protein FKSG28 (FKSG28), mRNA.
GI_22027524-S	12	1.1171	0.0078237	1	0.0301482	0.693729	1.28e-08	0.0003095	1.79e-06	NM_004840.1	ARHGEF6	S	Homo sapiens Rac/Cdc42 guanine nucleotide exchange factor (GEF) 6 (ARHGEF6), mRNA.	go_component: intracellular [goid 0005622] [evidence IC] [pmid 11017088]; go_function: Rho guanyl-nucleotide exchange factor activity [goid 0005089] [evidence NAS] [pmid 11017088]; go_function: GTPase activator activity [goid 0005096] [evidence
GI_4758311-S	12	1.1479	0.0081627	1	0.0311754	0.673573	2.43e-08	0.0005859	2.94e-06	NM_004453.1	ETFDH	S	Homo sapiens electron-transferring-flavoprotein dehydrogenase (ETFDH), nuclear gene encoding mitochondrial protein, mRNA.	go_component: mitochondrial inner membrane [goid 0005743] [evidence NR] [pmid 8306995]; go_component: mitochondrion [goid 0005739] [evidence IEA]; go_component: integral to membrane [goid 0016021] [evidence IEA]; go_component: membrane fraction
GI_4759059-I	12	1.18808	0.0093545	1	0.0344154	0.747568	4.29e-08	0.0010357	4.57e-06	NM_004799.1	MADHIP	I	Homo sapiens MAD, mothers against decapentaplegic homolog (Drosophila) interacting protein, receptor activation anchor (MADHIP), transcript variant 3, mRNA.	go_component: cytoplasm [goid 0005737] [evidence NAS]; go_function: serine-type peptidase activity [goid 0008236] [evidence NAS] [pmid 9582421]; go_function: zinc ion binding [goid 0008270] [evidence IEA]; go_function: receptor activity [goid 0
GI_29570796-S	12	1.22947	0.0099399	1	0.0363447	0.71313	8.59e-07	0.0205214	4.46e-05	NM_013261.2	PPARGC1A	S	Homo sapiens peroxisome proliferative activated receptor, gamma, coactivator 1, alpha (PPARGC1A), mRNA.	go_component: nucleus [goid 0005634] [evidence P] [pmid 10713165]; go_function: DNA binding [goid 0003677] [evidence P] [pmid 10713165]; go_function: transcription coactivator activity [goid 0003713] [evidence E] [pmid 10713165]; go_function: n
GI_22035561-S	12	1.10572	0.0108845	1	0.0388454	1.18548	1.3e-06	0.0309779	5.99e-05	NM_018310.2	BRF2	S	Homo sapiens BRF2, subunit of RNA polymerase III transcription initiation factor, BRF1-like (BRF2), mRNA.
GI_21687219-S	12	1.11886	0.0117061	1	0.0408003	0.712364	2.57e-09	6.24e-05	6.14e-07	NM_145274.1	MGC21518	S	Homo sapiens hypothetical protein MGC21518 (MGC21518), mRNA.
GI_38348207-S	12	1.10744	0.0128115	1	0.0436323	0.732161	1.35e-06	0.0320899	6.16e-05	NM_198446.1	FLJ45459	S	Homo sapiens FLJ45459 protein (FLJ45459), mRNA.
GI_42656935-S	12	1.21626	0.0139928	1	0.0468523	0.567188	3.68e-09	8.93e-05	7.6e-07	XM_373030.2	LOC285556	S	Homo sapiens hypothetical protein LOC285556 (LOC285556), mRNA.
GI_31542755-S	13	1.247	2.63e-05	0.0149057	0.0004967	0.603833	5.76e-11	1.4e-06	5.39e-08	NM_152341.2	FLJ30002	S	Homo sapiens hypothetical protein FLJ30002 (FLJ30002), mRNA.
GI_34304324-S	13	1.20484	4.38e-05	0.0246273	0.0007378	0.81563	4.97e-07	0.0119079	3.03e-05	NM_031902.3	MRPS5	S	Homo sapiens mitochondrial ribosomal protein S5 (MRPS5), nuclear gene encoding mitochondrial protein, mRNA.	go_component: ribosome [goid 0005840] [evidence IEA]; go_component: intracellular [goid 0005622] [evidence IEA]; go_component: mitochondrion [goid 0005739] [evidence IEA]; go_function: structural constituent of ribosome [goid 0003735] [evidence
GI_21269867-S	13	1.21551	0.0001959	0.106988	0.0022899	1.18052	1.44e-06	0.0342327	6.44e-05	NM_006473.2	TAF6L	S	Homo sapiens TAF6-like RNA polymerase II, p300/CBP-associated factor (PCAF)-associated factor, 65kDa (TAF6L), mRNA.	go_component: histone deacetylase complex [goid 0000118] [evidence TAS] [pmid 9674425]; go_component: nucleus [goid 0005634] [evidence IEA]; go_function: DNA binding [goid 0003677] [evidence TAS] [pmid 9674425]; go_function: transcription initi
GI_21281672-S	13	1.17121	0.0002653	0.14351	0.0028232	1.44882	4.57e-07	0.0109477	2.81e-05	NM_139284.1	LGI4	S	Homo sapiens leucine-rich repeat LGI family, member 4 (LGI4), mRNA.
GI_4759111-S	13	1.46526	0.000576	0.300686	0.0045775	0.446971	1e-07	0.0024144	8.94e-06	NM_004207.1	SLC16A3	S	Homo sapiens solute carrier family 16 (monocarboxylic acid transporters), member 3 (SLC16A3), mRNA.	go_component: membrane fraction [goid 0005624] [evidence TAS] [pmid 9425115]; go_component: integral to plasma membrane [goid 0005887] [evidence TAS] [pmid 9425115]; go_function: monocarboxylic acid transporter activity [goid 0008028] [evidence
GI_40254872-S	13	1.16487	0.0010578	0.540554	0.007331	1.21342	8.23e-08	0.0019832	7.71e-06	NM_014149.2	HSPC049	S	Homo sapiens HSPC049 protein (HSPC049), mRNA.
GI_39725673-S	13	1.2233	0.0027071	1	0.0150788	0.67347	1.5e-06	0.0356438	6.64e-05	NM_003377.3	VEGFB	S	Homo sapiens vascular endothelial growth factor B (VEGFB), mRNA.	go_component: membrane [goid 0016020] [evidence IEA]; go_component: extracellular [goid 0005576] [evidence NAS] [pmid 8919691]; go_function: vascular endothelial growth factor receptor binding [goid 0005172] [evidence NAS] [pmid 8919691]; go_fu
GI_5453861-S	13	1.17957	0.0034741	1	0.0178497	0.780614	1.5e-06	0.0356729	6.64e-05	NM_006202.1	PDE4A	S	Homo sapiens phosphodiesterase 4A, cAMP-specific (phosphodiesterase E2 dunce homolog, Drosophila) (PDE4A), mRNA.	go_component: insoluble fraction [goid 0005626] [evidence TAS] [pmid 8940140]; go_component: soluble fraction [goid 0005625] [evidence TAS] [pmid 8940140]; go_component: membrane fraction [goid 0005624] [evidence TAS] [pmid 9677330]; go_functio
GI_41350322-I	13	1.19909	0.003697	1	0.0186729	1.28781	1.56e-06	0.0371033	6.8e-05	NM_033392.3	MAPK8IP3	I	Homo sapiens mitogen-activated protein kinase 8 interacting protein 3 (MAPK8IP3), transcript variant 2, mRNA.	go_component: kinesin complex [goid 0005871] [evidence IEA]; go_component: cytoplasm [goid 0005737] [evidence ISS]; go_function: kinesin binding [goid 0019894] [evidence ISS]; go_function: MAP-kinase scaffold activity [goid 0005078] [evidence I
GI_40806192-S	13	1.104	0.0043247	1	0.0207863	0.826068	1.12e-07	0.002689	9.55e-06	NM_199129.1	Kua	S	Homo sapiens ubiquitin-conjugating enzyme variant Kua (Kua), mRNA.
GI_31317262-A	13	1.10861	0.0046415	1	0.0214445	0.792679	1.96e-06	0.0465858	8.17e-05	NM_181313.1	TAZ	A	Homo sapiens tafazzin (cardiomyopathy, dilated 3A (X-linked); endocardial fibroelastosis 2; Barth syndrome) (TAZ), transcript variant 4, mRNA.	go_process: heart development [goid 0007507] [evidence E] [pmid 9382096]; go_process: muscle development [goid 0007517] [evidence E] [pmid 9382096]; go_process: muscle contraction [goid 0006936] [evidence NR]; go_process: oncogenesis [goid 0007
GI_33286417-A	13	1.21773	0.0049981	1	0.0227396	0.69997	6e-07	0.0143499	3.44e-05	NM_002654.3	PKM2	A	Homo sapiens pyruvate kinase, muscle (PKM2), transcript variant 1, mRNA.
GI_20127485-S	13	1.16052	0.0056793	1	0.0253099	1.30569	2.96e-07	0.0071121	1.99e-05	NM_005817.2	M6PRBP1	S	Homo sapiens mannose-6-phosphate receptor binding protein 1 (M6PRBP1), mRNA.	go_component: endosome [goid 0005768] [evidence TAS] [pmid 9590177]; go_component: Golgi apparatus [goid 0005794] [evidence TAS] [pmid 9590177]; go_component: cytoplasm [goid 0005737] [evidence E] [pmid 9590177]; go_process: vesicle-mediated tr
GI_11072092-I	13	1.11703	0.0069174	1	0.0282891	1.35182	2.17e-07	0.0052169	1.6e-05	NM_018031.2	WDR6	I	Homo sapiens WD repeat domain 6 (WDR6), mRNA.	go_component: cellular_component unknown [goid 0008372] [evidence ND]; go_function: molecular_function unknown [goid 0005554] [evidence ND]; go_process: biological_process unknown [goid 0000004] [evidence ND]
GI_4507840-S	13	1.08874	0.0103841	1	0.0377373	0.80606	1.53e-06	0.0364972	6.73e-05	NM_003365.1	UQCRC1	S	Homo sapiens ubiquinol-cytochrome c reductase core protein I (UQCRC1), mRNA.	go_component: mitochondrial electron transport chain [goid 0005746] [evidence TAS] [pmid 8407948]; go_component: mitochondrion [goid 0005739] [evidence IEA]; go_component: inner membrane [goid 0019866] [evidence IEA]; go_function: ubiquinol-cyt
GI_21450766-S	13	1.13045	0.0107307	1	0.0385269	0.75262	5.67e-09	0.0001373	1.03e-06	NM_145029.1	C6orf136	S	Homo sapiens chromosome 6 open reading frame 136 (C6orf136), mRNA.
GI_27479430-S	21	0.811087	5.05e-06	0.0029458	0.0002151	1.37741	1.23e-08	0.0002985	1.75e-06	XM_050793.4	KIAA1393	S	Homo sapiens KIAA1393 protein (KIAA1393), mRNA.
GI_20336197-A	21	0.869502	7.85e-06	0.0045583	0.000292	0.75483	5.83e-07	0.0139523	3.37e-05	NM_004842.2	AKAP7	A	Homo sapiens A kinase (PRKA) anchor protein 7 (AKAP7), transcript variant alpha, mRNA.	go_component: plasma membrane [goid 0005886] [evidence NR]; go_function: protein kinase A anchoring activity [goid 0005079] [evidence NR]; go_process: ion transport [goid 0006811] [evidence E] [pmid 9545239]
GI_25777627-A	21	0.842098	1.03e-05	0.0059304	0.0003063	1.24022	9.88e-07	0.0235669	4.89e-05	NM_170741.1	KCNJ16	A	Homo sapiens potassium inwardly-rectifying channel, subfamily J, member 16 (KCNJ16), transcript variant 2, mRNA.	go_component: integral to membrane [goid 0016021] [evidence IEA]; go_function: voltage-gated ion channel activity [goid 0005244] [evidence IEA]; go_function: potassium channel activity [goid 0005267] [evidence IEA]; go_function: inward rectifie
GI_34147475-S	21	0.814084	1.63e-05	0.0093336	0.000406	1.28388	5e-10	1.21e-05	1.86e-07	NM_053048.2	MGC16384	S	Homo sapiens hypothetical protein MGC16384 (MGC16384), mRNA.
GI_21717815-S	21	0.806083	1.64e-05	0.0093705	0.000406	1.31228	1.09e-06	0.0259137	5.28e-05	NM_145648.1	SLC15A4	S	Homo sapiens solute carrier family 15, member 4 (SLC15A4), mRNA.	go_component: membrane [goid 0016020] [evidence IEA]; go_function: copper ion binding [goid 0005507] [evidence IEA]; go_function: transporter activity [goid 0005215] [evidence IEA]; go_process: oligopeptide transport [goid 0006857] [evidence IE
GI_19913344-S	21	0.871067	1.7e-05	0.0097411	0.000406	1.18792	2.96e-08	0.0007138	3.42e-06	NM_006527.2	SLBP	S	Homo sapiens stem-loop (histone) binding protein (SLBP), mRNA.	go_component: nucleus [goid 0005634] [evidence IEA]; go_component: ribonucleoprotein complex [goid 0030529] [evidence TAS]; go_function: ribonucleoprotein [goid 0003733] [evidence TAS] [pmid 10825184]; go_function: mRNA binding [goid 0003729] [
GI_27262623-I	21	0.725697	5.48e-05	0.0305641	0.0008371	1.5533	1.44e-10	3.51e-06	9.22e-08	NM_018672.2	ABCA5	I	Homo sapiens ATP-binding cassette, sub-family A (ABC1), member 5 (ABCA5), transcript variant 1, mRNA.	go_component: membrane [goid 0016020] [evidence IEA]; go_function: nucleotide binding [goid 0000166] [evidence IEA]; go_function: ATP binding [goid 0005524] [evidence IEA]; go_function: ATP-binding cassette (ABC) transporter activity [goid 0004
GI_31377721-S	21	0.805074	0.0001145	0.0630799	0.0014833	1.28673	1.71e-08	0.0004122	2.21e-06	NM_022121.2	PERP	S	Homo sapiens PERP, TP53 apoptosis effector (PERP), mRNA.
GI_13236586-S	21	0.857108	0.000218	0.118373	0.0024061	1.32464	5.42e-07	0.0129803	3.21e-05	NM_024334.1	MGC3222	S	Homo sapiens hypothetical protein MGC3222 (MGC3222), mRNA.
GI_5031748-S	21	0.82864	0.0002966	0.15929	0.0029465	1.32292	2.85e-07	0.0068493	1.93e-05	NM_005517.1	HMGN2	S	Homo sapiens high-mobility group nucleosomal binding domain 2 (HMGN2), mRNA.
GI_27436906-S	21	0.890177	0.000328	0.175807	0.0031493	1.21436	3.23e-07	0.0077533	2.14e-05	NM_004927.2	MRPL49	S	Homo sapiens mitochondrial ribosomal protein L49 (MRPL49), nuclear gene encoding mitochondrial protein, mRNA.	go_component: mitochondrion [goid 0005739] [evidence IEA]; go_component: cellular_component unknown [goid 0008372] [evidence ND]; go_function: structural constituent of ribosome [goid 0003735] [evidence IEA]; go_function: molecular_function unk
GI_4502754-S	21	0.820654	0.0003329	0.177767	0.0031493	1.2833	1.22e-06	0.0290323	5.72e-05	NM_001801.1	CDO1	S	Homo sapiens cysteine dioxygenase, type I (CDO1), mRNA.	go_function: electron transporter activity [goid 0005489] [evidence NR]; go_function: oxidoreductase activity [goid 0016491] [evidence IEA]; go_function: cysteine dioxygenase activity [goid 0017172] [evidence IEA]
GI_24430164-A	21	0.794791	0.0008632	0.443699	0.0061986	1.68284	2.14e-08	0.0005177	2.66e-06	NM_153322.1	PMP22	A	Homo sapiens peripheral myelin protein 22 (PMP22), transcript variant 3, mRNA.	go_component: membrane fraction [goid 0005624] [evidence NR]; go_component: integral to plasma membrane [goid 0005887] [evidence NR]; go_process: negative regulation of cell proliferation [goid 0008285] [evidence NR]; go_process: peripheral ner
GI_15451934-I	21	0.672388	0.0014881	0.751473	0.0096281	0.553842	4.91e-13	1.2e-08	1.99e-09	NM_003671.2	CDC14B	I	Homo sapiens CDC14 cell division cycle 14 homolog B (S. cerevisiae) (CDC14B), transcript variant 1, mRNA.
GI_22001414-S	21	0.75592	0.0015024	0.757194	0.0096281	1.50221	5.91e-07	0.0141498	3.4e-05	NM_015444.1	RIS1	S	Homo sapiens Ras-induced senescence 1 (RIS1), mRNA.
GI_34577060-S	21	0.787714	0.0020152	1	0.012183	1.90139	1.07e-06	0.0254627	5.22e-05	NM_000668.3	ADH1B	S	Homo sapiens alcohol dehydrogenase IB (class I), beta polypeptide (ADH1B), mRNA.	go_function: alcohol dehydrogenase activity, zinc-dependent [goid 0004024] [evidence TAS] [pmid 9982]; go_function: alcohol dehydrogenase activity [goid 0004022] [evidence E]; go_function: zinc ion binding [goid 0008270] [evidence TAS] [pmid 99
GI_9055269-S	21	0.813298	0.0022678	1	0.013251	1.7605	3.41e-07	0.0081896	2.24e-05	NM_018557.1	LRP1B	S	Homo sapiens low density lipoprotein-related protein 1B (deleted in tumors) (LRP1B), mRNA.	go_component: membrane [goid 0016020] [evidence IEA]; go_component: nucleus [goid 0005634] [evidence IEA]; go_function: internalization receptor activity [goid 0015029] [evidence TAS] [pmid 10766186]; go_function: low-density lipoprotein recept
GI_13325059-S	21	0.819507	0.0023888	1	0.0135594	1.62757	3.25e-08	0.0007851	3.68e-06	NM_000104.2	CYP1B1	S	Homo sapiens cytochrome P450, family 1, subfamily B, polypeptide 1 (CYP1B1), mRNA.	go_component: membrane [goid 0016020] [evidence IEA]; go_component: microsome [goid 0005792] [evidence IEA]; go_component: endoplasmic reticulum [goid 0005783] [evidence IEA]; go_function: cytochrome P450 activity [goid 0015034] [evidence TAS]
GI_38455393-S	21	0.887237	0.0026998	1	0.0150788	1.22795	8.81e-07	0.0210399	4.54e-05	NM_019896.2	POLE4	S	Homo sapiens polymerase (DNA-directed), epsilon 4 (p12 subunit) (POLE4), mRNA.	go_component: nucleus [goid 0005634] [evidence TAS] [pmid 10801849]; go_function: epsilon DNA polymerase activity [goid 0003893] [evidence TAS] [pmid 10801849]; go_function: DNA binding [goid 0003677] [evidence IEA]
GI_42560228-A	21	0.911581	0.0027739	1	0.0152355	1.25984	1.24e-08	0.0002991	1.75e-06	NM_015874.3	RBPSUH	A	Homo sapiens recombining binding protein suppressor of hairless (Drosophila) (RBPSUH), transcript variant 2, mRNA.	go_component: nucleus [goid 0005634] [evidence NAS]; go_function: tyrosine-based site-specific recombinase activity [goid 0009037] [evidence P]; go_function: DNA binding [goid 0003677] [evidence NAS] [pmid 8406481]; go_function: recombinase act
GI_31543817-S	21	0.788466	0.0030649	1	0.0161655	1.46112	1.41e-08	0.0003398	1.91e-06	NM_003722.3	TP73L	S	Homo sapiens tumor protein p73-like (TP73L), mRNA.	go_process: induction of apoptosis [goid 0006917] [evidence E] [pmid 9662378]
GI_4505854-S	21	0.913606	0.0044575	1	0.0210664	1.18469	5.83e-09	0.0001412	1.04e-06	NM_002655.1	PLAG1	S	Homo sapiens pleiomorphic adenoma gene 1 (PLAG1), mRNA.	go_function: transcription factor activity [goid 0003700] [evidence TAS] [pmid 9722527]
GI_4826815-S	21	0.833723	0.0057655	1	0.0253099	1.67761	8.4e-11	2.04e-06	6.82e-08	NM_005097.1	LGI1	S	Homo sapiens leucine-rich, glioma inactivated 1 (LGI1), mRNA.	go_function: tumor suppressor [goid 0008181] [evidence TAS] [pmid 9879993]; go_process: neurogenesis [goid 0007399] [evidence TAS] [pmid 9879993]; go_process: cell proliferation [goid 0008283] [evidence TAS] [pmid 9879993]
GI_4507894-S	21	0.831073	0.0065277	1	0.0275921	1.48063	1.11e-06	0.0264627	5.36e-05	NM_003380.1	VIM	S	Homo sapiens vimentin (VIM), mRNA.
GI_32455237-A	21	0.842674	0.00683	1	0.0282891	1.46602	4.32e-09	0.0001047	8.48e-07	NM_005525.2	HSD11B1	A	Homo sapiens hydroxysteroid (11-beta) dehydrogenase 1 (HSD11B1), transcript variant 1, mRNA.	go_component: microsome [goid 0005792] [evidence NAS] [pmid 1885595]; go_function: 11-beta-hydroxysteroid dehydrogenase activity [goid 0003845] [evidence NAS] [pmid 1885595]; go_function: oxidoreductase activity [goid 0016491] [evidence IEA]; g
GI_41327761-S	21	0.863677	0.0070433	1	0.0282891	1.33484	8.51e-07	0.0203404	4.45e-05	NM_007168.2	ABCA8	S	Homo sapiens ATP-binding cassette, sub-family A (ABC1), member 8 (ABCA8), mRNA.	go_component: membrane [goid 0016020] [evidence IEA]; go_function: nucleotide binding [goid 0000166] [evidence IEA]; go_function: ATP binding [goid 0005524] [evidence IEA]; go_function: ATP-binding cassette (ABC) transporter activity [goid 0004
GI_38202220-A	21	0.804995	0.0075695	1	0.0296804	1.73495	2.76e-09	6.7e-05	6.18e-07	NM_013281.2	FLRT3	A	Homo sapiens fibronectin leucine rich transmembrane protein 3 (FLRT3), transcript variant 1, mRNA.	go_component: integral to plasma membrane [goid 0005887] [evidence NAS] [pmid 10644439]; go_function: cell adhesion receptor activity [goid 0004895] [evidence TAS] [pmid 10644439]; go_function: receptor signaling protein activity [goid 0005057]
GI_42656266-S	21	0.922946	0.0088164	1	0.032841	0.76003	1.76e-07	0.0042299	1.37e-05	XM_372919.2	LOC391356	S	Homo sapiens similar to ENSANGP00000018456 (LOC391356), mRNA.
GI_15812179-S	21	0.837961	0.0089938	1	0.0332937	1.58653	2.07e-07	0.0049797	1.53e-05	NM_004926.2	ZFP36L1	S	Homo sapiens zinc finger protein 36, C3H type-like 1 (ZFP36L1), mRNA.	go_component: nucleus [goid 0005634] [evidence NR]; go_function: transcription factor activity [goid 0003700] [evidence NR] [pmid 8595910]
GI_24308174-S	21	0.931765	0.0120511	1	0.0417584	1.23984	1.55e-06	0.0369189	6.78e-05	NM_017940.1	FLJ20719	S	Homo sapiens hypothetical protein FLJ20719 (FLJ20719), mRNA.
GI_11496886-S	21	0.782442	0.0126675	1	0.0433898	1.67358	1.14e-07	0.0027493	9.73e-06	NM_000667.2	ADH1A	S	Homo sapiens alcohol dehydrogenase 1A (class I), alpha polypeptide (ADH1A), mRNA.	go_component: cytoplasm [goid 0005737] [evidence NAS]; go_function: alcohol dehydrogenase activity, zinc-dependent [goid 0004024] [evidence NAS] [pmid 2935875]; go_function: zinc ion binding [goid 0008270] [evidence IEA]; go_function: electron
GI_15834622-S	21	0.722168	0.0138801	1	0.0467375	2.85305	1.99e-11	4.85e-07	3.24e-08	NM_003064.2	SLPI	S	Homo sapiens secretory leukocyte protease inhibitor (antileukoproteinase) (SLPI), mRNA.	go_function: endopeptidase inhibitor activity [goid 0004866] [evidence P]; go_function: plasma protein [goid 0005209] [evidence TAS] [pmid 3485543]; go_function: serine protease inhibitor activity [goid 0004867] [evidence IEA]
GI_20302148-S	22	0.72812	2.78e-06	0.0016274	0.0001382	0.677491	1.78e-10	4.32e-06	9.69e-08	NM_006330.2	LYPLA1	S	Homo sapiens lysophospholipase I (LYPLA1), mRNA.	go_component: membrane fraction [goid 0005624] [evidence NR]; go_function: lysophospholipase activity [goid 0004622] [evidence TAS] [pmid 10064899]; go_function: catalytic activity [goid 0003824] [evidence IEA]
GI_10092638-S	22	0.718351	9.31e-06	0.0053798	0.000292	1.34591	4.37e-07	0.01047	2.72e-05	NM_016441.1	CRIM1	S	Homo sapiens cysteine-rich motor neuron 1 (CRIM1), mRNA.	go_component: extracellular [goid 0005576] [evidence IEA]; go_component: integral to membrane [goid 0016021] [evidence TAS] [pmid 10642437]; go_component: membrane fraction [goid 0005624] [evidence NR]; go_function: insulin-like growth factor r
GI_24475709-S	22	0.879672	1.9e-05	0.0108071	0.0004118	0.801178	1.11e-07	0.0026668	9.5e-06	NM_030940.2	HBLD2	S	Homo sapiens HESB like domain containing 2 (HBLD2), mRNA.	go_function: molecular_function unknown [goid 0005554] [evidence IEA]
GI_19923718-S	22	0.804407	2.78e-05	0.0156888	0.0005024	0.786609	1.68e-06	0.0398956	7.22e-05	NM_138288.1	C14orf147	S	Homo sapiens chromosome 14 open reading frame 147 (C14orf147), mRNA.
GI_34556206-I	22	0.737961	9.83e-05	0.054672	0.0013535	1.46323	3.32e-09	8.04e-05	6.97e-07	NM_183422.1	TSC22	I	Homo sapiens transforming growth factor beta-stimulated protein TSC-22 (TSC22), transcript variant 1, mRNA.	go_component: nucleus [goid 0005634] [evidence IEA]; go_function: transcription activating factor [goid 0003710] [evidence E] [pmid 9022669]; go_function: transcription factor activity [goid 0003700] [evidence IEA]; go_process: transcription fr
GI_22748762-S	22	0.847338	9.88e-05	0.0548402	0.0013535	0.6623	9.84e-14	2.4e-09	1.02e-09	NM_152352.1	MGC24180	S	Homo sapiens hypothetical protein MGC24180 (MGC24180), mRNA.
GI_40807495-I	22	0.839588	0.000211	0.114808	0.0023733	0.840996	1.6e-06	0.0380319	6.94e-05	NM_199324.1	HSHIN1	I	Homo sapiens HIV-1 induced protein HIN-1 (HSHIN1), transcript variant 1, mRNA.	go_component: cellular_component unknown [goid 0008372] [evidence ND]; go_component: nucleus [goid 0005634] [evidence IEA]; go_function: molecular_function unknown [goid 0005554] [evidence ND]; go_function: DNA binding [goid 0003677] [evidence
GI_13386461-A	22	0.851839	0.0002762	0.14916	0.0028882	1.27949	6.44e-07	0.0154122	3.66e-05	NM_024668.1	MASK	A	Homo sapiens multiple ankyrin repeats, single KH-domain (MASK) homolog (MASK), mRNA.
GI_31542241-S	22	0.870323	0.0003812	0.202775	0.0034949	0.839693	1.13e-06	0.0270329	5.46e-05	NM_017917.2	C14orf10	S	Homo sapiens chromosome 14 open reading frame 10 (C14orf10), mRNA.	go_function: calcium ion binding [goid 0005509] [evidence IEA]
GI_24475886-S	22	0.798962	0.0004305	0.228188	0.0037967	1.40789	4.09e-07	0.0098004	2.56e-05	NM_003667.2	GPR49	S	Homo sapiens G protein-coupled receptor 49 (GPR49), mRNA.	go_component: integral to plasma membrane [goid 0005887] [evidence TAS] [pmid 9642114]; go_function: G-protein coupled receptor activity [goid 0004930] [evidence P] [pmid 9642114]; go_function: protein-hormone receptor activity [goid 0016500] [
GI_14251214-S	22	0.803206	0.0004573	0.241016	0.0038533	1.48915	9.99e-08	0.0024049	8.94e-06	NM_001730.2	KLF5	S	Homo sapiens Kruppel-like factor 5 (intestinal) (KLF5), mRNA.	go_component: nucleus [goid 0005634] [evidence IEA]; go_function: RNA polymerase II transcription factor activity [goid 0003702] [evidence TAS] [pmid 8479902]; go_function: DNA binding [goid 0003677] [evidence IEA]; go_function: translation reg
GI_21687118-S	22	0.897667	0.000488	0.256197	0.0040395	1.3325	5.94e-12	1.45e-07	1.45e-08	NM_145263.1	LOC132671	S	Homo sapiens LOC132671 (LOC132671), mRNA.
GI_38373691-S	22	0.83381	0.0006071	0.316299	0.0047609	1.47985	1.42e-08	0.0003434	1.92e-06	NM_005324.3	H3F3B	S	Homo sapiens H3 histone, family 3B (H3.3B) (H3F3B), mRNA.	go_component: chromosome [goid 0005694] [evidence IEA]; go_component: nucleus [goid 0005634] [evidence IEA]; go_component: nucleosome [goid 0000786] [evidence ISS] [pmid 7557364]; go_function: DNA binding [goid 0003677] [evidence ISS] [pmid 755
GI_12965168-S	22	0.725387	0.0007415	0.383341	0.005524	1.62789	1.85e-07	0.0044477	1.42e-05	NM_012069.2	ATP1B4	S	Homo sapiens ATPase, (Na+)/K+ transporting, beta 4 polypeptide (ATP1B4), mRNA.	go_component: integral to plasma membrane [goid 0005887] [evidence TAS] [pmid 10456317]; go_function: monovalent inorganic cation transporter activity [goid 0015077] [evidence P] [pmid 10456317]; go_function: adenosinetriphosphatase activity [g
GI_32454732-A	22	0.827221	0.0009793	0.50237	0.0069482	1.19879	7.06e-07	0.0168699	3.87e-05	NM_181740.1	WINS1	A	Homo sapiens WINS1 protein with Drosophila Lines (Lin) homologous domain (WINS1), transcript variant 3, mRNA.
GI_8923389-S	22	0.899951	0.0011246	0.572413	0.0076165	0.72399	2.41e-10	5.85e-06	1.03e-07	NM_017812.1	CHCHD3	S	Homo sapiens coiled-coil-helix-coiled-coil-helix domain containing 3 (CHCHD3), mRNA.
GI_35493922-S	22	0.82478	0.001198	0.608566	0.0080223	1.48725	2.61e-09	6.34e-05	6.18e-07	NM_006031.3	PCNT2	S	Homo sapiens pericentrin 2 (kendrin) (PCNT2), mRNA.	go_component: centrosome [goid 0005813] [evidence E] [pmid 8124707]; go_component: microtubule cytoskeleton [goid 0015630] [evidence NR]; go_function: structural constituent of cytoskeleton [goid 0005200] [evidence NR]; go_process: microtubule
GI_8923929-S	22	0.839674	0.0019058	0.952875	0.0117096	0.734243	2.28e-09	5.52e-05	5.71e-07	NM_018464.1	C10orf70	S	Homo sapiens chromosome 10 open reading frame 70 (C10orf70), mRNA.
GI_21314723-S	22	0.899479	0.0020315	1	0.012183	1.39127	1.63e-06	0.0388545	7.04e-05	NM_024790.2	FLJ22490	S	Homo sapiens hypothetical protein FLJ22490 (FLJ22490), mRNA.
GI_26051230-I	22	0.880967	0.0022349	1	0.0131883	0.719244	2.64e-09	6.4e-05	6.18e-07	NM_032857.2	LACTB	I	Homo sapiens lactamase, beta (LACTB), nuclear gene encoding mitochondrial protein, transcript variant 1, mRNA.	go_component: mitochondrion [goid 0005739] [evidence IEA]; go_function: structural constituent of ribosome [goid 0003735] [evidence IEA]
GI_11321580-S	22	0.908819	0.0027864	1	0.0152355	0.754358	1.08e-08	0.0002621	1.63e-06	NM_003849.1	SUCLG1	S	Homo sapiens succinate-CoA ligase, GDP-forming, alpha subunit (SUCLG1), mRNA.	go_component: mitochondrion [goid 0005739] [evidence TAS] [pmid 9128182]; go_function: GTP binding [goid 0005525] [evidence IEA]; go_function: succinate-CoA ligase (GDP-forming) activity [goid 0004776] [evidence IEA]; go_function: ligase activi
GI_38570151-A	22	0.856635	0.0029365	1	0.0157671	0.81902	3.67e-07	0.008806	2.37e-05	NM_016283.3	TAF9	A	Homo sapiens TAF9 RNA polymerase II, TATA box binding protein (TBP)-associated factor, 32kDa (TAF9), transcript variant 2, mRNA.	go_component: transcription factor TFIID complex [goid 0005669] [evidence E] [pmid 7597030]; go_component: nucleus [goid 0005634] [evidence NR]; go_function: protein C-terminus binding [goid 0008022] [evidence E] [pmid 7597030]; go_function: ge
GI_14249503-S	22	0.904521	0.0039443	1	0.0194279	0.841056	1.78e-06	0.0423046	7.55e-05	NM_032813.1	FLJ14624	S	Homo sapiens hypothetical protein FLJ14624 (FLJ14624), mRNA.
GI_33386694-A	22	0.851593	0.0041146	1	0.0199376	0.7386	1.39e-07	0.0033474	1.13e-05	NM_182790.1	PBEF1	A	Homo sapiens pre-B-cell colony enhancing factor 1 (PBEF1), transcript variant 2, mRNA.	go_function: cytokine activity [goid 0005125] [evidence TAS] [pmid 8289818]; go_process: positive regulation of cell proliferation [goid 0008284] [evidence TAS] [pmid 8289818]; go_process: signal transduction [goid 0007165] [evidence TAS] [pmid
GI_5729936-S	22	0.897191	0.0043703	1	0.0208376	0.743608	1.12e-11	2.73e-07	2.28e-08	NM_006554.1	MTX2	S	Homo sapiens metaxin 2 (MTX2), mRNA.	go_component: mitochondrial outer membrane [goid 0005741] [evidence TAS] [pmid 10381257]; go_component: mitochondrion [goid 0005739] [evidence IEA]; go_function: protein transporter activity [goid 0008565] [evidence IEA]; go_process: mitochondr
GI_22041854-S	22	0.923014	0.0048914	1	0.022425	1.44735	1.65e-09	4e-05	4.62e-07	XM_042323.8	CAMTA1	S	Homo sapiens calmodulin binding transcription activator 1 (CAMTA1), mRNA.
GI_4502846-S	22	0.875456	0.0055894	1	0.0252371	1.34479	7.71e-08	0.001859	7.31e-06	NM_001280.1	CIRBP	S	Homo sapiens cold inducible RNA binding protein (CIRBP), mRNA.	go_component: nucleus [goid 0005634] [evidence IEA]; go_function: RNA binding [goid 0003723] [evidence TAS] [pmid 9151692]; go_function: DNA binding [goid 0003677] [evidence IEA]; go_process: response to cold [goid 0009409] [evidence TAS] [pmid
GI_27532983-A	22	0.902445	0.0057285	1	0.0253099	0.809683	1.03e-07	0.0024753	9.07e-06	NM_173206.1	MIZ1	A	Homo sapiens Msx-interacting-zinc finger (MIZ1), transcript variant alpha, mRNA.	go_component: nucleus [goid 0005634] [evidence IEA]; go_function: zinc ion binding [goid 0008270] [evidence TAS]; go_function: DNA binding [goid 0003677] [evidence IEA]
GI_37539300-S	22	0.763555	0.0058276	1	0.0253521	0.598105	8.78e-09	0.0002124	1.4e-06	XM_353706.1	LOC378204	S	Homo sapiens similar to amyotrophic lateral sclerosis 2 (juvenile) chromosome region, candidate 2; ILP-interacting protein ILPIPA (LOC378204), mRNA.
GI_5902095-S	22	0.904263	0.0059042	1	0.0254994	1.21499	1.87e-07	0.0044975	1.43e-05	NM_006936.1	SMT3H1	S	Homo sapiens SMT3 suppressor of mif two 3 homolog 1 (yeast) (SMT3H1), mRNA.	go_component: kinetochore [goid 0005699] [evidence TAS] [pmid 9119407]; go_component: kinetochore [goid 0000776] [evidence TAS]
GI_31542938-S	22	0.830245	0.0070359	1	0.0282891	1.41384	2.64e-08	0.0006387	3.14e-06	NM_000860.2	HPGD	S	Homo sapiens hydroxyprostaglandin dehydrogenase 15-(NAD) (HPGD), mRNA.	go_function: catalytic activity [goid 0003824] [evidence E] [pmid 1697582]; go_function: prostaglandin-D synthase activity [goid 0004667] [evidence NR]; go_function: electron transporter activity [goid 0005489] [evidence NR]; go_function: oxido
GI_20270310-S	22	0.886818	0.0070723	1	0.0282891	0.72037	8.88e-07	0.0212039	4.55e-05	NM_138773.1	LOC91137	S	Homo sapiens hypothetical protein BC017169 (LOC91137), mRNA.	go_component: mitochondrial inner membrane [goid 0005743] [evidence IEA]; go_component: membrane [goid 0016020] [evidence IEA]; go_component: cellular_component unknown [goid 0008372] [evidence ND]; go_function: binding [goid 0005488] [evidence
GI_32171240-S	22	0.8218	0.0075564	1	0.0296804	1.35624	1.04e-06	0.0247999	5.09e-05	NM_002600.2	PDE4B	S	Homo sapiens phosphodiesterase 4B, cAMP-specific (phosphodiesterase E4 dunce homolog, Drosophila) (PDE4B), mRNA.	go_component: insoluble fraction [goid 0005626] [evidence TAS] [pmid 9371714]; go_component: soluble fraction [goid 0005625] [evidence TAS] [pmid 9371714]; go_function: cAMP-specific phosphodiesterase activity [goid 0004115] [evidence TAS] [pmi
GI_6912299-A	22	0.930531	0.0083623	1	0.0315437	0.849299	1.61e-06	0.0382229	6.95e-05	NM_012123.1	MTO1	A	Homo sapiens mitochondrial translation optimization 1 homolog (S. cerevisiae) (MTO1), mRNA.	go_function: molecular_function unknown [goid 0005554] [evidence IEA]; go_function: disulfide oxidoreductase activity [goid 0015036] [evidence IEA]; go_process: electron transport [goid 0006118] [evidence IEA]
GI_34147366-S	22	0.923702	0.0105793	1	0.0382136	0.748602	4.75e-08	0.0011467	4.95e-06	NM_024117.2	MAPKAP1	S	Homo sapiens mitogen-activated protein kinase associated protein 1 (MAPKAP1), mRNA.	go_component: cellular_component unknown [goid 0008372] [evidence ND]; go_function: Ras interactor activity [goid 0017016] [evidence NAS] [pmid 1849280]; go_process: biological_process unknown [goid 0000004] [evidence ND]
GI_17978488-A	22	0.886018	0.0113357	1	0.0397415	1.26438	6.91e-07	0.0165357	3.84e-05	NM_001784.2	CD97	A	Homo sapiens CD97 antigen (CD97), transcript variant 2, mRNA.	go_component: integral to plasma membrane [goid 0005887] [evidence P]; go_component: plasma membrane [goid 0005886] [evidence E]; go_function: G-protein coupled receptor activity [goid 0004930] [evidence P]; go_function: transmembrane receptor
GI_23503258-S	22	0.951229	0.013011	1	0.0440599	1.1227	1.24e-06	0.029495	5.78e-05	NM_153339.1	FLJ90811	S	Homo sapiens hypothetical protein FLJ90811 (FLJ90811), mRNA.	go_function: pseudouridylate synthase activity [goid 0004730] [evidence IEA]; go_process: tRNA processing [goid 0008033] [evidence IEA]
GI_19923286-S	22	0.80701	0.0145335	1	0.0483908	1.37641	1.71e-06	0.0405993	7.31e-05	NM_006885.2	ATBF1	S	Homo sapiens AT-binding transcription factor 1 (ATBF1), mRNA.	go_component: nucleus [goid 0005634] [evidence TAS] [pmid 1719379]; go_function: RNA polymerase II transcription factor activity, enhancer binding [goid 0003705] [evidence TAS] [pmid 1719379]; go_function: transcription factor activity [goid 00
